# Supplementary material
Source: PubMed Central journal article supplement (PMC6583381)
Supplement: jamapsychiatry-e173206-s001.pdf [file jamapsychiatry-e173206-s001.pdf]

---

**Clinical Study Protocol**

|                |                |
|----------------|----------------|
| Drug Substance | XR-NTX         |
| Study Code     | NTX-204725-1   |
| EudraCT Code   | 2011-002858-31 |
| Edition Number | 3C             |
| Date           | 12. Jun 2012   |

---

---

**Optimal Prevention of Overdose Deaths and Opioid Relapse Following Discharge: A Multi-Center RCT**

---

**Sponsor:** The Norwegian Centre for Addiction Research, University of Oslo, Norway, Research Director Jørgen Bramness, Professor MD

**Funding:** Norwegian Research Council (unrestricted grant # 204725/V50)

**National Coordinating Investigator (PI) & Sponsor Representative:** Lars Tanum MD, PhD

**Project Coordinator:** Nikolaj Kunøe PhD

The following Amendment(s) and Administrative Changes have been made to this protocol since the date of preparation:

| <b>Amendment No.</b>             | <b>Date of Amendment</b>             | <b>Local Amendment No:</b>             | <b>Date of Local Amendment</b>             |
|----------------------------------|--------------------------------------|----------------------------------------|--------------------------------------------|
| _____                            | _____                                | _____                                  | _____                                      |
| <b>Administrative Change No.</b> | <b>Date of Administrative Change</b> | <b>Local Administrative Change No.</b> | <b>Date of Local Administrative Change</b> |
| B                                | April 1 <sup>st</sup> 2012           | _____                                  | _____                                      |
| C                                | Jun 12th 2012                        | _____                                  | _____                                      |
| _____                            | _____                                | _____                                  | _____                                      |
| _____                            | _____                                | _____                                  | _____                                      |

1  
2  
3

4 **SPONSOR SIGNATURE PAGE**

Title Optimal Prevention of Overdose Deaths and Opioid Relapse Following Discharge:  
A Multi-Center RCT

Protocol ID NTX-SBX  
no:

EudraCT no: 2011-002858-31

5

6 **Sponsor signatory approval**

7

8 ***I hereby declare that I will conduct the study in compliance with the Protocol, ICH GCP***  
9 ***and the applicable regulatory requirements:***

10

1.1 Jørgen G. Bramness, Professor, MD  
Research Director, Norwegian Centre for Addiction Research,  
University of Oslo, Norway

---

*Sponsor signature*

---

*Date*

11

12 **PI signatory approval**

13

14 ***I hereby declare that I will conduct the study in compliance with the Protocol, ICH GCP***  
15 ***and the applicable regulatory requirements:***

1.1.1.1 Lars Tanum, assistant Professor, MD  
National Coordinating Investigator (PI)

---

*PI signature*

---

*Date*

16 **PROTOCOL SYNOPSIS**

---

**Optimal Prevention of Overdose Deaths and Opioid Relapse Following Discharge: A Multi-Center RCT**

---

17

18 **Principal Investigator**

19 Lars Tanum MD, Ph.D.

20 **Study centre(s) and number of patients planned**

21 This study will be conducted in approximately 220 randomised patients in Norway to yield  
22 180 evaluable patients at approximately 6 study sites. Number of patients per study site is  
23 expected to vary depending on patient availability at the different study sites. Additional sites  
24 may be added during the study.

**Study period**

Estimated date of first patient  
enrolled

Aug 31<sup>st</sup> 2012

**Phase of development**

Phase III

Estimated date of last patient  
completed

Sep 30<sup>th</sup> 2015

25

26 Estimated end of study date (database lock) is Mar 31<sup>st</sup> 2016.

27 **Objectives**

28 This study will investigate the effectiveness and safety of sustained release naltrexone  
29 injectable suspension (VIVITROL®) (XR-NTX) in opiate dependent individuals.

30 The primary objectives of this study are to compare the current 1st-choice medication in  
31 Norway for opioid dependence, buprenorphine-naloxone, with extended release naltrexone on

32 a) abstinence from opioid use

33 b) overdose mortality (OD)

34 c) retention in treatment in situations with a high incidence of opioid use and/or OD

35 d) Compare the effects of any of the above medical interventions with participants who  
36 decline to receive pharmacological treatment but agree to enter a non-randomized comparison  
37 group

38 The secondary objectives are to:

- 39 a) Compare the effectiveness of treatment with naltrexone versus buprenorphine-  
40 naloxone across clinical – and criminal justice settings
- 41 b) Assess to what extent other variables such as mental health, use of non-opioid  
42 substances or social adjustment problems influence the treatment outcomes
- 43 c) Assess the influence of study interventions, no intervention, and/or setting on other  
44 variables such as concomitant substance use, morbidity, or recidivism.

#### 45 **Study design**

46 This is a 12-week multicentre, open-label, randomised treatment study of the effectiveness  
47 and safety of sustained release naltrexone injectable suspension (VIVITROL®) (later referred  
48 to as XR-NTX) 380 mg/month versus buprenorphine-naloxone 8-24 mg/day in the treatment  
49 of opioid dependent patients, with a follow-up treatment period of 36 weeks.

#### 50 **Target patient population**

51 Male or female patients, 18 to 65 years old, with a DSM-IV-TR (Diagnostic and Statistical  
52 Manual of Mental Disorders, 4<sup>th</sup> edition Text Revision) diagnosis of opioid dependence,  
53 Single Episode (304.00) and confirmed by the Mini-International Neuropsychiatric Interview  
54 (MINI).

#### 55 **Investigational product and comparator, dosage and mode of administration**

56 The eligible patients will be randomly assigned to one of the two treatment arms:

- 57 – XR-NTX 380 mg/month (IM)
- 58 – Buprenorphine-naloxone 8-24 mg/day (oral)

59 Preparations to be used in the study are:

- 60 – 380 mg naltrexone for extended release injectable suspension (XR-NTX)
- 61 – Buprenorphine-naloxone combination tablets with a buprenorphine component  
62 of 8-24 mg and a naloxone component of 2-8 mg

63

64 Buprenorphine-naloxone tablets (8-24 mg) will be administered orally once daily in  
65 accordance with existing national and local guidelines for OMT / LAR.

66 XR-NTX 380 mg (IM) will be injected once every four weeks.

67 **Duration of treatment**

68 Eligible patients will enter a detoxification period in a controlled environment of minimum 7  
69 days for the discontinuation of all illicit substances. Prior to discharge, patients will be  
70 randomized to treatment in a 1:1 ratio to commence 12 weeks of outpatient treatment with  
71 either 3 x 380 mg/month XR-NTX fixed dose or 8-24 mg/day buprenorphine-naloxone on a  
72 flexible dose regimen. All buprenorphine-naloxone patients will start on 4 mg/day but the  
73 dose will be increased until a satisfactory effect is obtained. Patients in the naltrexone  
74 380 mg/month treatment group will receive the 380 mg dose following randomisation and  
75 monthly thereafter.

76 After 12 weeks, the patients will enter a 36-week follow-up treatment study. During this part  
77 of the study they may receive either buprenorphine-naloxone or XR-NTX based on their  
78 personal preference.

79 **Outcome variables**

80 **Effectiveness**

81 – **Primary outcome variables:**

- 82 - Abstinence from illicit opioids assessed by the absence of non-study opioid  
83 agonists or their metabolites in oral fluid and/or patient-reported use of such  
84 opioids during the first 12 weeks of the study
- 85 - Retention in medication group at each assessment during the first 12 weeks
- 86 - Mortality at Week 48 as measured by journal and/or national mortality registry  
87 data

88 – **Secondary outcome variables:**

- 89 - Compare the effectiveness of the treatment interventions between the  
90 individuals recruited from criminal justice settings versus treatment settings
- 91 - Influence of the treatment interventions on non-opioid substance use, mental  
92 health, morbidity, medical treatment, and social adjustment problems
- 93 - To what extent other variables such as mental health or social adjustment  
94 problems influence the treatment outcome
- 95 - Proportion of patients in each group satisfying criteria for DSM-IV opioid  
96 dependence (304.00; except buprenorphine) at Week 12
- 97 - Proportion of patients in each group satisfying criteria for DSM-IV opioid  
98 dependence (304.00; except buprenorphine) at Week 48 or at time of leaving the  
99 study

100

101

102       **Patient-reported outcomes (PRO)**

103               – Number of days without use of heroin or other illicit opioids during the 85-day  
104               study period using time-line follow-back

105               – Craving for heroin

106               – Quality of life

107               – Mental health

108               – Abstinence orientation

109               – Sleep problems

110               – Opioid agonist effect rating

111               – Injecting drug use

112   – **Pharmacokinetic**

113               – Patients with detectable quantities of study drug in oral fluid

114   – **Safety**

115               – Incidence of adverse events (AEs)

116               – Incidence of AEs leading to withdrawal from the study

117               – Incidence of serious adverse events (SAEs)

118               – Incidence of AEs of special interest (overdose)

119

120

121

122

123

124

125

126 **Statistical methods**

127 Although this is an exploratory study in which precise power analyses are complicated by a  
128 lack of precedent in the existing literature, there are three null-hypotheses stating that there are

129 - no differences between XR-NTX 380 mg/month (IM) or buprenorphine-  
130 naloxone (8-24 mg/day) with regard to the primary outcome variables

131 - no difference between the treatment groups with regard to change in DSM-IV  
132 diagnostic criteria from randomisation to Week 12

133 - no difference between the randomized treatment groups and the non-  
134 randomized participant group with regard to the primary outcome variables  
135

136 Descriptive statistics including frequency tables, graphs or scatterplots will be provided for all  
137 primary outcomes, as well as for the changes from baseline within each treatment and the  
138 differences between the treatment groups at each visit (Observed Cases (OC) and LOCF as  
139 appropriate).

140 All statistical tests will be two-sided with a significance level of 5%, i.e.,  $\alpha=0.05$  unless  
141 otherwise specified. Secondary analyses will report nominal 5% levels of significance. No  
142 adjustments for multiplicity will be made for these secondary analyses. Where appropriate,  
143 model-based point estimates will be presented together with their 95% confidence interval.

144 Missing data will be imputed using a Last Observation Carried Forward (LOCF) approach.

145 A step-wise sequential testing procedure will be used for handling multiple comparisons to  
146 preserve an overall significance level of 0.05.

147 The primary outcome variable will be analysed using an analysis of variance (ANOVA) or  
148 regression model as appropriate including treatment, study site and baseline frequency of  
149 opioid use as explanatory variables. Study site will be treated as a random effect while all  
150 other explanatory variables will be treated as fixed effects.

151 Changes from randomisation to every assessment will be analysed similar to the primary  
152 objective.

153 Incidence rates will be calculated for AEs (including serious adverse events leading to  
154 withdrawals and deaths, if any) and reasons for premature discontinuation registered. Other  
155 safety variables that evaluate physical examinations, laboratory assessments, vital signs, ECGs  
156 and selected AEs will be analysed by means of descriptive statistics, frequency tabulations,  
157 and graphical displays as appropriate. For all participants, physical examination and  
158 laboratory assessment is performed as part of study enrolment.

159

160

161 **Analysis populations**

162 All data analyses, both primary and secondary, will be performed using at least one of the  
163 following analysis sets:

- 164           – The safety population will include all randomised patients who took at least  
165           one dose of study medication, classified according to the treatment actually  
166           received.
- 167           – The intention-to-treat (ITT) population will include all patients who were  
168           included and randomised to a treatment, regardless of whether first treatment  
169           dose was received or not. This population includes all drop-outs regardless of  
170           duration of participation.
- 171           – The modified intention-to-treat (MITT) population (Full Analysis Set) will  
172           include all randomised patients, classified according to the randomised  
173           treatment, who received at least one dose of study treatment and who have at  
174           least one valid assessment after randomisation. Data from the MITT population  
175           will be used for analysis of the effectiveness objectives.
- 176           – The per-protocol (PP) population, a subset of the MITT population, will  
177           include patients who completed the study treatment with no major protocol  
178           violations or deviations affecting effectiveness. Data from this population will  
179           be used as a consistency check for analysis of the primary objective.

180



## TABLE OF CONTENTS

## PAGE

|     |                                                                                   |    |
|-----|-----------------------------------------------------------------------------------|----|
| 181 | TITLE PAGE.....                                                                   | 1  |
| 182 | PROTOCOL SYNOPSIS.....                                                            | 3  |
| 183 | TABLE OF CONTENTS.....                                                            | 9  |
| 184 | LIST OF ABBREVIATIONS AND DEFINITION OF TERMS .....                               | 15 |
| 185 | 1. INTRODUCTION .....                                                             | 19 |
| 186 | 1.1 Background.....                                                               | 19 |
| 187 | 1.2 Opioid detoxification .....                                                   | 19 |
| 188 | 1.3 Psychosocial interventions .....                                              | 20 |
| 189 | 1.4 Opioid maintenance treatment (OMT) .....                                      | 20 |
| 190 | 1.4.1 Methadone .....                                                             | 21 |
| 191 | 1.4.2 Buprenorphine .....                                                         | 22 |
| 192 | 1.4.3 Buprenorphine-naloxone.....                                                 | 23 |
| 193 | 1.4.4 OMT summary.....                                                            | 23 |
| 194 | 1.5 Antagonist treatment.....                                                     | 23 |
| 195 | 1.5.1 Naltrexone.....                                                             | 24 |
| 196 | 1.5.1.1 Oral naltrexone .....                                                     | 24 |
| 197 | 1.5.2 Extended release naltrexone.....                                            | 25 |
| 198 | 1.6 Drug use and the criminal justice setting.....                                | 26 |
| 199 | 1.6.1 Prison-based treatment of opioid dependence .....                           | 27 |
| 200 | 1.7 Rationale for this study .....                                                | 28 |
| 201 | 2. STUDY OBJECTIVES.....                                                          | 30 |
| 202 | 2.1 Primary objective.....                                                        | 30 |
| 203 | 2.2 Secondary objectives .....                                                    | 30 |
| 204 | 3. STUDY PLAN AND PROCEDURES.....                                                 | 34 |
| 205 | 3.1 Overall study design and flow chart.....                                      | 34 |
| 206 | 3.1.2 Enrolment period (up to 30 days).....                                       | 35 |
| 207 | 3.1.3 Twelve-week randomised treatment period (Visit 2 to Visit 13).....          | 35 |
| 208 | 3.1.4 Thirty-six-week non-randomised treatment period (Visit 14 to Visit 23)..... | 36 |
| 209 | 3.1.5 Unscheduled visits .....                                                    | 40 |
| 210 | 3.2 Rationale and risk/benefit assessment.....                                    | 40 |
| 211 | 3.2.1 Rationale for study design, doses, and control groups.....                  | 40 |
| 212 | 3.2.2 Risk/benefit and ethical assessment .....                                   | 40 |
| 213 | 3.3 Selection of study population.....                                            | 41 |
| 214 | 3.3.1 Study selection record.....                                                 | 41 |
| 215 | 3.3.2 Inclusion criteria .....                                                    | 41 |
| 216 | 3.3.3 Exclusion Criteria .....                                                    | 41 |

|     |         |                                                                       |    |
|-----|---------|-----------------------------------------------------------------------|----|
| 217 | 3.3.4   | Interactions with study medications .....                             | 42 |
| 218 | 3.3.5   | Restrictions .....                                                    | 42 |
| 219 | 3.3.6   | Discontinuation of patients from treatment or assessment .....        | 42 |
| 220 | 3.3.6.1 | Criteria for discontinuation / End of Study.....                      | 42 |
| 221 | 3.3.6.2 | Procedures for discontinuation.....                                   | 43 |
| 222 | 3.4     | Treatments .....                                                      | 44 |
| 223 | 3.4.1   | Identity of investigational product and comparators .....             | 44 |
| 224 | 3.4.2   | Doses and treatment regimens.....                                     | 44 |
| 225 | 3.4.3   | Labelling.....                                                        | 45 |
| 226 | 3.4.4   | Storage.....                                                          | 45 |
| 227 | 3.4.5   | Accountability.....                                                   | 45 |
| 228 | 3.5     | Method of assigning patients to treatment groups.....                 | 46 |
| 229 | 3.6     | Pre-study, concomitant and post-study medication(s).....              | 47 |
| 230 | 3.7     | Treatment compliance.....                                             | 48 |
| 231 | 3.8     | Psychosocial treatment and care recommended to all participants ..... | 49 |
| 232 | 4.      | MEASUREMENTS OF STUDY VARIABLES AND DEFINITIONS OF                    |    |
| 233 |         | OUTCOME VARIABLES .....                                               | 50 |
| 234 | 4.1     | Primary variable.....                                                 | 50 |
| 235 | 4.2     | Screening and demographic measurements.....                           | 50 |
| 236 | 4.3     | Patient-Reported Outcomes (PRO) .....                                 | 51 |
| 237 | 4.3.1   | The Temporal Satisfaction With Life Scale (TSWLS).....                | 52 |
| 238 | 4.3.1.1 | Methods of assessment.....                                            | 52 |
| 239 | 4.3.1.2 | Derivation or calculation of outcome variable (TSWLS).....            | 52 |
| 240 | 4.3.2   | Insomnia Severity Index (ISI).....                                    | 52 |
| 241 | 4.3.2.1 | Methods of assessment.....                                            | 52 |
| 242 | 4.3.2.2 | Derivation or calculation of outcome variable (ISI).....              | 52 |
| 243 | 4.3.3   | Stages of Change Readiness and Treatment Eagerness Scale – Drugs      |    |
| 244 |         | (SOCRATES-8D).....                                                    | 52 |
| 245 | 4.3.3.1 | Methods of assessment.....                                            | 52 |
| 246 | 4.3.3.2 | Derivation or calculation of outcome variable (Socrates-8D) .....     | 53 |
| 247 | 4.3.4   | Heroin effect, craving, & treatment satisfaction (VAS) .....          | 53 |
| 248 | 4.3.4.1 | Methods of assessment.....                                            | 53 |
| 249 | 4.3.4.2 | Derivation or calculation of outcome variable (VAS).....              | 53 |
| 250 | 4.3.5   | Hopkins’ Symptom Checklist 25 (SCL-25) .....                          | 53 |
| 251 | 4.3.5.1 | Derivation or calculation of outcome variable (SCL-25) .....          | 53 |
| 252 | 4.4     | Health Economic measurements and variables. ....                      | 54 |
| 253 | 4.5     | Pharmacokinetic measurements and variables .....                      | 54 |
| 254 | 4.5.1   | Determination of drug concentration in biological samples .....       | 54 |
| 255 | 4.5.1.1 | Collection of biological samples .....                                | 54 |
| 256 | 4.5.1.2 | Labelling of pharmacokinetic samples .....                            | 55 |
| 257 | 4.5.1.3 | Shipping of pharmacokinetic samples.....                              | 55 |

|     |         |                                                                                                      |    |
|-----|---------|------------------------------------------------------------------------------------------------------|----|
| 258 | 4.5.2   | Drug concentration measurements, and derivation or calculation of pharmacokinetic parameters .....   | 56 |
| 259 |         |                                                                                                      |    |
| 260 | 4.6     | Effectiveness measurement and variables .....                                                        | 56 |
| 261 | 4.6.1   | Oral fluid/saliva samples as outcome measures .....                                                  | 56 |
| 262 | 4.6.2   | Addiction Severity Index, European Version (Europ-ASI) .....                                         | 57 |
| 263 | 4.6.2.1 | Methods of assessment.....                                                                           | 57 |
| 264 | 4.6.2.2 | Derivation or calculation of outcome variable (Europ-ASI).....                                       | 57 |
| 265 | 4.6.3   | Mini Neuropsychiatric Interview (MINI).....                                                          | 57 |
| 266 | 4.6.3.1 | Methods of assessment.....                                                                           | 57 |
| 267 | 4.6.3.2 | Derivation or calculation of outcome variable (MINI).....                                            | 58 |
| 268 | 4.6.4   | Time-Line Follow-Back (TLFB).....                                                                    | 58 |
| 269 | 4.6.4.1 | Methods of assessment.....                                                                           | 58 |
| 270 | 4.6.4.2 | Derivation or calculation of outcome variable (TLFB) .....                                           | 58 |
| 271 | 4.6.5   | Registry data for mortality, morbidity, medical treatment, recidivism, prescription medications..... | 58 |
| 272 |         |                                                                                                      |    |
| 273 | 4.6.5.1 | Derivation or calculation of outcome variable (registries).....                                      | 58 |
| 274 | 4.7     | Safety measurements and adverse events as outcomes.....                                              | 59 |
| 275 | 4.7.4   | Laboratory safety measurements and variables.....                                                    | 60 |
| 276 | 4.7.4.1 | Methods of assessment.....                                                                           | 60 |
| 277 | 4.7.4.2 | Derivation or calculation of outcome variables.....                                                  | 61 |
| 278 | 4.7.5   | Vital signs and physical examination .....                                                           | 62 |
| 279 | 4.7.5.1 | Methods of assessment.....                                                                           | 62 |
| 280 | 4.8     | Volume of blood sampling and handling of biological samples.....                                     | 62 |
| 281 | 4.8.1   | Analysis of biological samples.....                                                                  | 62 |
| 282 | 4.8.1.1 | Clinical chemistry samples.....                                                                      | 63 |
| 283 | 5.      | DATA MANAGEMENT.....                                                                                 | 63 |
| 284 | 6.      | STATISTICAL METHODS AND DETERMINATION OF SAMPLE SIZE .....                                           | 64 |
| 285 | 6.1     | Statistical evaluation - general aspects.....                                                        | 64 |
| 286 | 6.2     | Description of outcome variables in relation to objectives and hypotheses.....                       | 64 |
| 287 | 6.2.1   | Primary objective, hypotheses, and outcome variables .....                                           | 64 |
| 288 | 6.2.2   | Secondary objectives, hypotheses, and outcome variables.....                                         | 65 |
| 289 | 6.2.2.1 | Secondary objective of particular interest .....                                                     | 65 |
| 290 | 6.2.2.2 | Other secondary objectives: Effectiveness.....                                                       | 65 |
| 291 | 6.2.2.3 | Other secondary objectives: Quality of Life.....                                                     | 66 |
| 292 | 6.2.2.4 | Other secondary objectives: Safety .....                                                             | 67 |
| 293 | 6.2.2.5 | Other secondary objectives: Pharmacokinetics .....                                                   | 67 |
| 294 | 6.2.2.6 | Other secondary objectives: Other registry data.....                                                 | 67 |
| 295 | 6.3     | Description of analysis sets.....                                                                    | 68 |
| 296 | 6.4     | Method of statistical analysis .....                                                                 | 69 |
| 297 | 6.4.1   | General aspects .....                                                                                | 69 |
| 298 | 6.4.2   | Multiplicity .....                                                                                   | 69 |
| 299 | 6.4.3   | Primary variable.....                                                                                | 69 |

|     |         |                                                                      |    |
|-----|---------|----------------------------------------------------------------------|----|
| 300 | 6.4.4   | Secondary variable of particular interest .....                      | 70 |
| 301 | 6.4.5   | Other secondary variables .....                                      | 70 |
| 302 | 6.4.5.1 | Non-opioid substance use .....                                       | 70 |
| 303 | 6.4.5.2 | Visual Analogue Scales.....                                          | 70 |
| 304 | 6.4.5.3 | SOCRATES-8D.....                                                     | 71 |
| 305 | 6.4.5.4 | Registry data on morbidity, prescriptions and criminal offences..... | 71 |
| 306 | 6.4.5.5 | TSWLS .....                                                          | 71 |
| 307 | 6.4.6   | Safety analyses.....                                                 | 71 |
| 308 | 6.4.6.1 | Physical examinations, laboratory assessments, and vital signs ..... | 71 |
| 309 | 6.4.6.2 | Adverse events.....                                                  | 72 |
| 310 | 6.4.6.3 | Waist circumference .....                                            | 72 |
| 311 | 6.4.6.4 | ISI .....                                                            | 72 |
| 312 | 6.4.6.5 | SCL-25.....                                                          | 72 |
| 313 | 6.4.6.6 | Suicidality.....                                                     | 72 |
| 314 | 6.4.7   | Pharmacokinetics .....                                               | 72 |
| 315 | 6.5     | Determination of sample size.....                                    | 73 |
| 316 | 6.6     | Interim analyses .....                                               | 74 |
| 317 | 6.7     | Data and safety monitoring board .....                               | 74 |
| 318 | 7.      | STUDY MANAGEMENT .....                                               | 75 |
| 319 | 7.1     | Monitoring .....                                                     | 75 |
| 320 | 7.2     | Audits and inspections .....                                         | 76 |
| 321 | 7.3     | Training of staff .....                                              | 76 |
| 322 | 7.4     | Changes to the protocol.....                                         | 76 |
| 323 | 7.5     | Study agreements .....                                               | 77 |
| 324 | 7.6     | Study timetable and end of study .....                               | 77 |
| 325 | 8.      | ETHICS .....                                                         | 77 |
| 326 | 8.1     | Ethics review .....                                                  | 77 |
| 327 | 8.2     | Ethical conduct of the study .....                                   | 78 |
| 328 | 8.3     | Informed consent .....                                               | 78 |
| 329 | 8.4     | Patient data protection and storage.....                             | 78 |
| 330 | 9.      | SAFETY ASSESSMENTS .....                                             | 79 |
| 331 | 9.1     | Definitions .....                                                    | 79 |
| 332 | 9.1.1   | Adverse Event (AE).....                                              | 79 |
| 333 | 9.1.2   | Serious Adverse Event (SAE).....                                     | 79 |
| 334 | 9.1.3   | Suspected Unexpected Serious Adverse Reaction (SUSAR) .....          | 80 |
| 335 | 9.2     | Recording of adverse events .....                                    | 80 |
| 336 | 9.2.1   | Expected Adverse Events.....                                         | 81 |
| 337 | 9.2.2   | Diagnosis .....                                                      | 82 |

|     |       |                                                                     |    |
|-----|-------|---------------------------------------------------------------------|----|
| 338 | 9.2.3 | Causality .....                                                     | 82 |
| 339 | 9.2.4 | Abnormal laboratory tests/vital signs .....                         | 82 |
| 340 | 9.2.5 | Rating scales/patient-reported outcomes .....                       | 82 |
| 341 | 9.2.6 | Adverse event of Special Interest – substance-related overdose..... | 83 |
| 342 | 9.2.7 | Follow-up of ongoing adverse events.....                            | 83 |
| 343 | 9.2.8 | Overdose of study medication.....                                   | 83 |
| 344 | 9.3   | Reporting of serious adverse events (SAE).....                      | 83 |
| 345 | 9.3.1 | Outcome Death .....                                                 | 84 |
| 346 | 9.4   | Procedures in case of emergency, overdose or pregnancy.....         | 84 |
| 347 | 9.4.1 | Emergency contact procedure .....                                   | 84 |
| 348 | 9.4.2 | Procedures in case of medical emergency .....                       | 84 |
| 349 | 9.4.3 | Procedures in case of overdose .....                                | 85 |
| 350 | 9.5   | Procedures in case of pregnancy .....                               | 85 |
| 351 | 9.6   | Procedures in case of suicide attempt or suicide .....              | 85 |
| 352 | 10.   | REFERENCES .....                                                    | 87 |
| 353 |       |                                                                     |    |

**LIST OF TABLES**

**PAGE**

|     |           |                                                                           |    |
|-----|-----------|---------------------------------------------------------------------------|----|
| 354 | Table 1a) | Study plan and procedures 12-week randomized study period .....           | 37 |
| 355 | Table 1b) | Study plan and procedures 36-week post-RCT phase (4-week                  |    |
| 356 |           | follow-up.....                                                            | 38 |
| 357 | Table 1c) | Study plan and procedures, non-medicated control patients .....           | 39 |
| 358 | Table 2   | Investigational products.....                                             | 44 |
| 359 | Table 3   | Titration of investigational product & comparator .....                   | 45 |
| 360 | Table 4   | Prohibited pre-study medications and treatments .....                     | 48 |
| 361 | Table 5   | Concomitant medications and treatments that are prohibited,               |    |
| 362 |           | allowed with restrictions, or permitted during the study .....            | 48 |
| 363 | Table 6   | Patient-reported outcomes objectives and variables relating to each       |    |
| 364 |           | objective.....                                                            | 51 |
| 365 | Table 7   | Safety objectives and variables relating to each objective .....          | 59 |
| 366 | Table 8   | Laboratory measurements .....                                             | 60 |
| 367 | Table 9   | Volume of blood to be drawn from each patient at enrolment / Pre-         |    |
| 368 |           | inclusion phase (inpatient) (Visit 1-2, Day -30 to 0, Week -4 to 0) ..... | 62 |
| 369 | Table 10  | Minimum sample size for the RCT.....                                      | 74 |
| 370 |           |                                                                           |    |
| 371 |           |                                                                           |    |

**LIST OF FIGURES**

**PAGE**

372 Figure 1. Study flow chart ..... 36  
373

**LIST OF APPENDICES**

374 Appendix A Signatures  
375 Appendix B Additional Safety Information  
376 Appendix C Diagnostic Criteria for Opioid Dependence according to DSM-IV TR  
377 Appendix D CIOMS form and instructions  
378

**LIST OF SUPPLEMENTS**

379 Supplement 1 Contact Information on Study Sites & Investigators for Regular  
380 Correspondence, Medication Shipments, & Emergency Situations  
381 Supplement 2 Investigators and Study Administrative Structure  
382 Supplement 3 Dissemination Plan

383 **LIST OF ABBREVIATIONS AND DEFINITION OF TERMS**

384 The following abbreviations and special terms are used in this study protocol.

| <b>Abbreviation or special term</b> | <b>Explanation</b>                                                                                  |
|-------------------------------------|-----------------------------------------------------------------------------------------------------|
| AE                                  | Adverse event (see definition in Section 4.7)                                                       |
| AIDS                                | Acquired immunodeficiency syndrome                                                                  |
| Alkermes <sup>TM</sup>              | Manufacturer of naltrexone for extended release injectable suspension used in this study, VIVITROL® |
| ALT                                 | S-Alanine Neutrophil Count                                                                          |
| ANC                                 | Absolute Neutrophil Count                                                                           |
| ANOVA                               | Analysis of variance                                                                                |
| AST                                 | S-Aspartate aminotransferase                                                                        |
| Assessment                          | An observation made on a variable involving a subjective judgement (assessment)                     |
| ATC                                 | Anatomical Therapeutic Chemical                                                                     |
| AUC                                 | Area under the plasma concentration-versus-time curve                                               |
| BMI                                 | Body mass index                                                                                     |
| CBC                                 | Complete Blood Count                                                                                |
| CBT                                 | Cognitive behavioural treatment                                                                     |
| CDES                                | Clinical Data Entry Site                                                                            |
| CIOMS                               | Council for International Organizations of Medical Sciences                                         |
| CRF                                 | Case Report Form; the document holding all evaluated data for one study participant. Also see eCRF  |
| CSA                                 | Clinical Study Agreement                                                                            |
| CSP                                 | Clinical Study Protocol                                                                             |
| CSR                                 | Clinical Study Report                                                                               |
| DMP                                 | Data Management Plan                                                                                |
| DNA                                 | Deoxyribonucleic acid                                                                               |
| DSM-IV                              | Diagnostic and Statistical Manual of Mental Disorders, 4 <sup>th</sup> Edition                      |
| DUS                                 | Disease Under Study                                                                                 |
| DVM                                 | Data Validation Manual                                                                              |
| ECG                                 | Electrocardiogram                                                                                   |
| eCRF                                | Electronic Case Report Form                                                                         |

| <b>Abbreviation or special term</b> | <b>Explanation</b>                                                                                                                                                                                                                                  |
|-------------------------------------|-----------------------------------------------------------------------------------------------------------------------------------------------------------------------------------------------------------------------------------------------------|
| ECT                                 | Electroconvulsive therapy                                                                                                                                                                                                                           |
| EMA                                 | European Medicines Agency. In Norway represented by NOMA (below).                                                                                                                                                                                   |
| EPJ                                 | Electronic Patient Journal; the term for any computer-based system used for the recording of medical records like personal information on the patient, ongoing treatment, treatment history. Usually also includes results from laboratory analyses |
| End of study                        | End of study is defined as Database Lock, which is the time point after which no patient will be exposed to study related activities                                                                                                                |
| Eudra-CT                            | European Union Drug Regulating Authorities Clinical Trials                                                                                                                                                                                          |
| Europ-ASI                           | Addiction Severity Index, European Version. This study uses an adapted 5 <sup>th</sup> version of this instrument                                                                                                                                   |
| FDA                                 | Food and Drug Administration                                                                                                                                                                                                                        |
| FHI                                 | The National Institute of Public Health in Norway. In this CSP, FHI will be used as an acronym for its Division of Forensic Toxicology, which is the designated laboratory for all routine follow-up analyses of biological samples in this study   |
| GCP                                 | Good Clinical Practice                                                                                                                                                                                                                              |
| GMP                                 | Good Manufacturing Practice                                                                                                                                                                                                                         |
| HbA1c                               | Glycosylated haemoglobin                                                                                                                                                                                                                            |
| IB                                  | Investigator's Brochure                                                                                                                                                                                                                             |
| ICF                                 | Informed Consent Form                                                                                                                                                                                                                               |
| ICH                                 | International Conference on Harmonisation                                                                                                                                                                                                           |
| IEC                                 | Independent Ethics Committee; the ICH term for the ethical committee evaluating ethical aspects of research studies. In Norway, this is the Regional Ethical Committee (REC)                                                                        |
| Investigational product             | A pharmaceutical form of an active ingredient or placebo being tested in a clinical study. In this study the investigational products are once-monthly XR-NTX and daily ingested buprenorphine-naloxone                                             |
| IPS                                 | <i>Investigational Products Service</i>                                                                                                                                                                                                             |
| IR                                  | <i>Immediate Release</i>                                                                                                                                                                                                                            |
| IRB                                 | Institutional Review Board, the US implementation of ICH IECs                                                                                                                                                                                       |
| ISF                                 | Investigator Study File; A dossier containing all essential documents relating to conducting a clinical trial or copies of these documents.                                                                                                         |
| ISI                                 | Insomnia Severity Index                                                                                                                                                                                                                             |



| <b>Abbreviation or special term</b> | <b>Explanation</b>                                                                                                                                                                                                                                                                   |
|-------------------------------------|--------------------------------------------------------------------------------------------------------------------------------------------------------------------------------------------------------------------------------------------------------------------------------------|
| LAR                                 | Acronym for the Norwegian National OMT programme, which is the sole legal option for OMT. All opioid dependent adults in Norway have the right to receive OMT in LAR free of charge for as long as they have a treatment need. LAR enrolment is an inclusion criterion in this study |
| LOCF                                | Last Observation Carried Forward                                                                                                                                                                                                                                                     |
| MDD                                 | Major Depressive Disorder                                                                                                                                                                                                                                                            |
| Measurement                         | An observation made on a variable using a measurement device.                                                                                                                                                                                                                        |
| MHRA                                | Medicines and Healthcare products Regulatory Agency                                                                                                                                                                                                                                  |
| MINI                                | Mini-International Neuropsychiatric Interview                                                                                                                                                                                                                                        |
| MITT                                | Modified intention to treat                                                                                                                                                                                                                                                          |
| mL                                  | Milliliter                                                                                                                                                                                                                                                                           |
| NOMA                                | Norwegian Medicines Agency. The agency tasked with ensuring that pharmacological clinical trials in Norway are compliant with EMEA directives.                                                                                                                                       |
| NTX                                 | Naltrexone                                                                                                                                                                                                                                                                           |
| OAE                                 | Other Significant Adverse Event (i.e., adverse events of particular clinical importance, other than SAE and those AE leading to discontinuation of the patient from study treatment; see definition in Section 4.7).                                                                 |
| OC                                  | Observed Cases                                                                                                                                                                                                                                                                       |
| OD                                  | Overdose Death; these are anticipated SAE's in the present study                                                                                                                                                                                                                     |
| OMT                                 | Opioid Maintenance Treatment; medical treatment of opioid dependence with opioid agonists like methadone or buprenorphine. Norway has a single mandated OMT programme called LAR (see above)                                                                                         |
| Outcome variable                    | A variable (usually a derived variable) specifically defined to be used in the analysis of a study objective                                                                                                                                                                         |
| Parameter                           | A quantity (usually unknown) that characterises the distribution of a variable in a population of patients                                                                                                                                                                           |
| PP                                  | Per-protocol                                                                                                                                                                                                                                                                         |
| Principal Investigator              | A person responsible for the conduct of a clinical study                                                                                                                                                                                                                             |
| PRO                                 | Patient-reported outcomes                                                                                                                                                                                                                                                            |
| REC                                 | Regional Ethical Committee. The Norwegian implementation of ICH IECs.                                                                                                                                                                                                                |
| Reckit-Benckiser                    | Manufacturer of Subutex© (buprenorphine) and Suboxone©, (buprenorphine-naloxone) for use in OMT.                                                                                                                                                                                     |
| TSWLS                               | The Temporal Satisfaction With Life Scale, 'Present' items                                                                                                                                                                                                                           |
| SAE                                 | Serious adverse event (see definition in Section 4.7).                                                                                                                                                                                                                               |
| SAP                                 | Statistical Analysis Plan                                                                                                                                                                                                                                                            |

| <b>Abbreviation or special term</b> | <b>Explanation</b>                                                                                                                                                                                                                                                                                            |
|-------------------------------------|---------------------------------------------------------------------------------------------------------------------------------------------------------------------------------------------------------------------------------------------------------------------------------------------------------------|
| SOP                                 | Standard Operating Procedure; In GCP, SOP denotes a detailed written instructions to achieve uniformity of the performance of a specific function                                                                                                                                                             |
| SCL-25                              | Hopkins' Symptom Checklist, 25-item version                                                                                                                                                                                                                                                                   |
| SDV                                 | Source Data Verification                                                                                                                                                                                                                                                                                      |
| SNRI                                | Serotonin/norepinephrine reuptake inhibitor                                                                                                                                                                                                                                                                   |
| Sponsor                             | Sponsor is an ICH designated term for a person or institution undertaking special administrative responsibilities for a study, including funding. As this study is investigator-initiated, the Principal Investigator adopts the responsibilities of the Sponsor and is often entitled 'Sponsor-Investigator' |
| SR                                  | Sustained release                                                                                                                                                                                                                                                                                             |
| SRX                                 | Sustained release naltrexone                                                                                                                                                                                                                                                                                  |
| SSRI                                | Selective serotonin reuptake inhibitor                                                                                                                                                                                                                                                                        |
| SUSAR                               | Suspected Unexpected Serious Adverse Reaction                                                                                                                                                                                                                                                                 |
| $t_{1/2}$                           | Elimination half-life                                                                                                                                                                                                                                                                                         |
| TCA                                 | Tricyclic antidepressant                                                                                                                                                                                                                                                                                      |
| TIA                                 | Transient Ischemic Attack                                                                                                                                                                                                                                                                                     |
| TLFB                                | Time-line follow-back, an interviewing technique based on structured memorization (back-tracking)                                                                                                                                                                                                             |
| TSH                                 | Thyroid Stimulating Hormone                                                                                                                                                                                                                                                                                   |
| UTS                                 | Urine Toxicology Screening                                                                                                                                                                                                                                                                                    |
| Washout period                      | Period during which prohibited medication should be washed out                                                                                                                                                                                                                                                |
| WBC                                 | White Blood Cell Count                                                                                                                                                                                                                                                                                        |
| WBDC                                | Web Based Data Capture                                                                                                                                                                                                                                                                                        |
| WHO                                 | World Health Organisation                                                                                                                                                                                                                                                                                     |
| XR-NTX                              | Naltrexone for extended-release injectable suspension                                                                                                                                                                                                                                                         |

## 385 **1. INTRODUCTION**

### 386 **1.1 Background**

387 Opioid dependence is considered a chronic, relapsing disorder that carries an increased risk of  
388 repeated intoxications and overdose death (1). Heroin is the most commonly abused opioid,  
389 and in the European Union an estimated 1.3 to 1.7 million individuals (about 0.5% of the adult  
390 population) are considered problem opioid users. A decreasing trend since 2000 appears to  
391 have been reversed in recent years (2). The United Nations Office on Drugs and Crime  
392 similarly estimates a low opioid use prevalence of approximately 0.6% for the USA and of  
393 0.25% when the whole world's population is considered (3).

394 Although affecting a relatively small group of the general population, the impact of illicit  
395 heroin use on addicted individuals, their families and the community can be profound.  
396 Mechanisms at biological, psychological, and social levels usually contribute in continuing the  
397 addictive state, while conversely making recovery difficult. Thus, patients' engagement in  
398 their own recovery and treatment often gravitates towards relapse, making recovery a long-  
399 term process that is often only partially achieved and frequently interrupted by relapse  
400 episodes.

401 Opioid abuse involves greatly increased risk of mortality and morbidity, marginalization, and  
402 criminal behaviour that contributes extensively to the total crime burden and illicit economy.  
403 These problems may overwhelm entire communities. Few effective treatment options as well  
404 as the nature of the disorder itself has meant only a minority of opioid users are receiving  
405 active treatment at any one time (4). Still, treatment interventions have been developed to  
406 reduce the harm associated with opioid dependence and/or facilitate the road to improvement  
407 or recovery.

### 408 **1.2 Opioid detoxification**

409 The purpose of detoxification is to discontinue the patient's physiological dependence on  
410 opioids. Medication-free detoxification methods allow the full symptoms of withdrawal to  
411 develop and run their course, a method commonly known as 'cold turkey'. As this method is  
412 associated with high chances of dropout, relapse, and overdose, most current guidelines  
413 recommend utilizing one or several medications to ameliorate withdrawal symptoms. These  
414 include tapered methadone, tapered methadone plus adjunctive medication, other opioid  
415 agonists, adrenergic agonists like clonidine and lofexidine, buprenorphine, and other  
416 symptomatic medications (5, 6).

417 Detoxification can be provided in specialist inpatient units, psychiatric wards, outpatient  
418 clinics, in primary care, and in prisons. Whereas detoxification from opioids *can* be achieved  
419 in an outpatient setting, completion rates are often as low as 40-50 % of those entering  
420 treatment (7).

421

422 Although detoxification offers various opportunities for improvement, the achievement of a  
423 drug-free state is not a risk-neutral event. Among patients who have been detoxified in  
424 inpatient or residential services, an initial lapse to opioid use often occurs very soon after  
425 leaving the programme (8). The reduction or loss of tolerance that occurs during  
426 detoxification greatly increases the individual at risk of overdose upon resumption of opioid  
427 use (9). Mortality and recovery outcomes for detoxification-only patients have been found to  
428 be consistently worse than for those who receive agonist maintenance, long-term residential,  
429 or outpatient counselling treatment (10).

430

### 431 **1.3 Psychosocial interventions**

432 Psychosocial interventions comprise a range of non-pharmacological interventions, from  
433 psychotherapy to drug counselling and case management, from self-help groups to brief  
434 intervention sessions. In a clinical setting, these treatments are administered in out- or  
435 inpatient settings, alone or in combination, as stand-alone treatment or in conjunction with  
436 drug screening measures (saliva, hair or urine) or pharmacotherapy. Prospective studies have  
437 reported satisfactory proportions of heroin abstinence among participants receiving  
438 psychosocial treatment, e.g. 49 % in the British NTORS cohort at five years after residential  
439 treatment (11), 43 % in the American DATOS cohort at five years after methadone  
440 maintenance start (12) and up to 65 % in the Australian ATOS cohort at one year after  
441 treatment (13).

442 However, the risk of relapse and overdose death after discharge from residential treatment has  
443 been reported to be high (14). Release from prison has been shown to constitute a similar  
444 high-risk situation. This phenomenon suggests two main areas of improvement for  
445 psychosocial treatments of opioid dependence:

- 446 a) The transition from life as an active opioid user to abstinent, 'straight' member of
- 447 society can often be too abrupt, triggering relapse and increasing the risk of overdose.
- 448 b) Counsellors in clinical settings are prone to underestimating the risk of relapse and
- 449 overdose in the patient group; prolonging treatment beyond the initial stages of
- 450 recovery may have life-saving consequences.

451

### 452 **1.4 Opioid maintenance treatment (OMT)**

453 One of the most widely used therapeutic modalities for the management of opioid addiction is  
454 opioid agonist maintenance treatment (OMT). In 2005, approximately 530 000 Europeans  
455 received OMT, with 80% receiving methadone and 19% buprenorphine (2).

456

457 The purpose of opioid maintenance is usually not to achieve a drug free state, but to assist the  
458 individual in reducing illicit drug use by replacing heroin with controlled administration of an  
459 opioid agonist medication. Most OMT programs thus emphasize pharmacological stabilization

460 of the dependent state as a means to achieve psychosocial functioning for the individual and to  
461 reduce harms and costs for society; reduction of risky and harmful behaviours is considered  
462 the main aim of treatment. Many programmes avoid stating abstinence and rehabilitation as  
463 programme goals, feeling it risks alienating patients from entering and remaining in an  
464 effective treatment.

465 In principle, any opioid agonist may be used as part of OMT, also termed agonist replacement  
466 therapy or agonist substitution. The current drug of choice is methadone worldwide, and many  
467 programmes also offer the mu-agonist/kappa antagonist buprenorphine. Heroin and slow-  
468 release morphine have also been used. Guidelines generally recommend that choice of OMT  
469 medication should be based on acceptability and feasibility regarding elements such as side  
470 effects, stabilizing properties, dosing frequency and risk of illicit diversion. Opioid drugs  
471 should also be safe in long-term high-dosage use.

472

#### 473 **1.4.1 Methadone**

474 Methadone is a full opioid agonist. When taken orally, it is almost completely absorbed and  
475 has high bioavailability. Methadone is slowly metabolised, reaches peak plasma levels within  
476 2-4 hours after administration, and the half-life is about 24 hours with a range of 13-50 hours.  
477 A stabilised patient can usually take the medication once a day without withdrawal symptoms  
478 prior to next day's intake (15). Close monitoring of effects during the first two hours after  
479 ingestion is important because the slow methadone metabolism may cause accumulation, and  
480 because other drugs may have synergistic effects on sedation and respiratory depression.  
481 There may be an increased mortality risk during the first weeks of treatment(16). Meta-  
482 analyses conclude that flexible, high-dose strategies are most effective (17, 18). The  
483 recommended dose range is 60-100 mg, sometimes up to 120 mg daily (4).

484 Two recent Cochrane systematic reviews & meta analyses support the effectiveness of  
485 methadone in terms of increased retention in treatment and reduced heroin use (19, 20). The  
486 first review reported that OMT has a positive influence on illicit heroin use, HIV risk-taking  
487 and criminal behaviour (with moderate to large effect sizes varying between 0.22 for HIV  
488 risk-taking and 0.70 for drug-related crime) (21). While this is strong evidence in favour of  
489 OMT findings are limited to those staying in treatment and those seeking treatment. Further,  
490 several longitudinal cohort studies indicate that those who remain in treatment have markedly  
491 reduced mortality and criminality and increased health, even when an ITT type analysis is  
492 used (22-25). Conversely, terminating treatment, and involuntarily termination in particular, is  
493 followed by increased risk of mortality and criminal involvement (26).

494 Although methadone is generally regarded as having few long-term problems, cardiac side  
495 effects with dose dependent QTc prolongation are reported at high dosages (27, 28). Mortality  
496 estimates indicate that serious events are infrequent (29). It is important to conduct regular  
497 medical examinations during OMT, in particular when doses are increased. Concurrent use  
498 with other medications that may cause prolonged QTc should be avoided.

499

#### 500 **1.4.2 Buprenorphine**

501 Buprenorphine is a synthetic opioid that exerts agonism at the  $\mu$ -opioid receptor while being  
502 an antagonist at the kappa receptor. As a partial agonist the maximum effect of buprenorphine  
503 is less than the maximum effect of a full agonists at the receptor. A ceiling effect is reached at  
504 about 16 to 20 mg (30). Buprenorphine is probably less likely than methadone to produce  
505 sedation or intoxication, but it may be less effective for patients needing high dosage OMT.  
506 Buprenorphine binds to the receptor almost irreversibly and the dissociation from the receptor  
507 is slow (31, 32). It will displace most other opioids from the receptor, and if buprenorphine is  
508 taken first, other opioids will be unable to displace it, even in high doses. For these reasons,  
509 buprenorphine can precipitate withdrawal in users who have taken other opioids before  
510 buprenorphine (33), but buprenorphine maintenance may protect patients against overdosing  
511 with other opioids (34). Taken orally, buprenorphine has a bioavailability of only 16%, but it  
512 increases to between 20 and 40% with sublingual administration (35). The strong binding to  
513 the opioid receptor, the active metabolite norbuprenorphine, recirculation in the enterohepatic  
514 system and the possible depot effect in the mucosa of the mouth make it possible to administer  
515 buprenorphine once a day or even thrice weekly (36).

516 Evidence on the efficacy of buprenorphine maintenance has come from placebo-controlled  
517 trials (37-41), fixed dosing studies comparing buprenorphine with methadone maintenance  
518 (42-49) and flexible dosing studies of the two drugs (50-53). There is some variation in the  
519 outcome measures for the different trials, but the outcome most frequently reported is  
520 treatment retention. Other measures are opioid use (self-reported and in urine analysis), use of  
521 cocaine and illicit benzodiazepines or criminal activity. Buprenorphine has been found to be  
522 superior to placebo in reducing opioid use when given in medium and high doses (up to 16 mg  
523 per day), but not in low doses (54). In some studies buprenorphine is inferior to methadone  
524 when given in comparable doses. This may be due to the ceiling effect of buprenorphine that  
525 is reached at higher doses, making it difficult for many patients to reach an adequate level of  
526 opioid substitution. The partial agonist-antagonist pharmacology of buprenorphine has been  
527 used as a rationale for its use in less controlled OMT programmes, e.g. prescription in general  
528 practice. The strong binding may cause problems in reversing opioid effects with naltrexone  
529 or naloxone.

530 Due to special legislative circumstances there has been a comprehensive use of buprenorphine  
531 in general practice in France. Since 1996, registered medical doctors have been allowed to  
532 prescribe buprenorphine without any special education or licensing. Approximately 20% of  
533 French general practitioners prescribe buprenorphine to patients and they treat more than half  
534 the problem heroin users in this low threshold treatment modality (55, 56). The low level of  
535 training that the physicians receive has been criticised (57), but overall this practice has been  
536 considered a success with reductions in mortality, crime rate and cases of newborn with opioid  
537 withdrawal (58).

538 When switching from methadone to buprenorphine a rapid change could induce withdrawal  
539 symptoms. Before introducing buprenorphine, the methadone dose should therefore be slowly

540 reduced until about 30 mg/day. This way the withdrawal reactions will be kept to a minimum  
541 and may be limited to some dysphoria (59).

542  
543 **1.4.3 Buprenorphine-naloxone**

544 Both methadone and buprenorphine are vulnerable to diversion during administration and  
545 subsequent illicit sale and/or abuse. This has resulted in the development of a compound  
546 containing both buprenorphine and naloxone (Suboxone®). Naloxone is a medium-strength  
547 opioid antagonist with low bioavailability when taken sublingually; but when injected it has  
548 high bioavailability, making the buprenorphine-naloxone combination less attractive for  
549 diversion than ordinary buprenorphine. Studies of the most commonly marketed  
550 buprenorphine-naloxone product, Suboxone® suggest it is probably as effective as  
551 buprenorphine with regard to retention in treatment and use of opioids (60), and can be  
552 administered with less supervision and less risk of diversion (61). For these reasons,  
553 buprenorphine-naloxone is currently the first-choice medication for OMT in Norway.

554

555 **1.4.4 OMT summary**

556 The main potential of OMT with methadone or buprenorphine is its ability to significantly  
557 reduce mortality among patients, especially from opioid overdose. In addition, OMT often  
558 induces a reduction in illicit opioid use, improves quality of life and reduces patients'  
559 involvement in criminal activities. These results have made OMT the treatment recommended  
560 by the WHO for opioid dependence (4). Flexible / variable dosing regimens are currently  
561 recommended as there are individual variations with regard to medication metabolism and –  
562 response.

563 However, OMT is not without disadvantages; treatment dropout during the first months of  
564 treatment is often substantial, with different programmes and studies reporting 20% - 60% of  
565 all those initiated having dropped out at 6 months. Dropout patients return to pre-treatment  
566 levels of opioid use and mortality. The use of opioid agonists as therapeutic medications  
567 means there is always a risk of diversion of the prescribed medication to illicit markets, where  
568 they are sold and abused. OMT programs often utilize control measures and restrict patients'  
569 access to self-administer medication in order to avoid diversion, something patients may find  
570 intrusive and limiting of their personal freedom as citizens. The low-threshold focus of many  
571 OMT programs can also make OMT centres a difficult social scene for those patients who  
572 have developed opioid dependence but have a high level of functioning on one or several  
573 social domains (e.g. employment, family).

574

575 **1.5 Antagonist treatment**

576 A different approach to maintaining opioid dependence by use of agonists (OMT) is to  
577 complete detoxification and subsequently assist abstinence by help of antagonist medication.

578 By using a full antagonist like naltrexone, relapse to heroin will have little effect as its action  
579 is almost completely blocked by the antagonist. This not only provides a pharmacological  
580 protection against relapse, re-dependence, and overdose, but also provides users who wish to  
581 maintain abstinence with a considerable cognitive relief from relapse-related thoughts.  
582 Although several opioid antagonists have been produced, naltrexone is currently the  
583 medication that seems closest to fulfil clinical requirements with regard to receptor binding,  
584 half-life, and adverse effects.

585

### 586 **1.5.1 Naltrexone**

587 Naltrexone is the most prominent example and has been developed with substantial support  
588 from the US National Institute on Drug Abuse (NIDA) in the 1970s (62). Naltrexone binds to  
589 all three opioid receptor (OR) subtypes with the highest affinity for the  $\mu$ -OR and lacks the  
590 rewarding effect of agonists (63). Naltrexone competes with opioid agonists for receptor  
591 binding sites and due to its high affinity naltrexone effectively blocks agonist binding. It also  
592 displaces full agonists such as heroin and methadone from the receptors and may thus  
593 precipitate withdrawal. To avoid major withdrawal symptoms such as nausea, vomiting and  
594 psychosis, naltrexone treatment is either induced after accomplished detoxification (four to  
595 seven days after last opioid intake) or during heavy sedation or general anaesthesia combined  
596 with adrenergic agonists like clonidine or lofexidine. Administering naltrexone during  
597 extended periods of time has the potential to significantly improve outcomes from abstinence-  
598 orientated treatment (64).

599 Naltrexone is pharmacodynamically similar to naloxone, but seems to exert a stronger binding  
600 to receptors, has a satisfactory level of oral bioavailability, and longer half-life when  
601 compared to naloxone.

#### 602 **1.5.1.1 Oral naltrexone**

603 The oral bioavailability of naltrexone ranges from 5 to 40%, with peak plasma levels reached  
604 within one hour. Dosing regimens have ranged between 25 - 150 mg oral naltrexone daily,  
605 enabling thrice weekly dosing (100-100-150 mg).

606 Early research on oral naltrexone pointed to low patient engagement in treatment and high  
607 attrition rates (65). However, selected subgroups with extra social incentives for achieving  
608 abstinence may benefit from oral naltrexone treatment. Addicted physicians and business  
609 executives jeopardizing their jobs (66) and prisoners on parole (67) are reported to have better  
610 compliance with oral naltrexone treatment in combination with psychosocial counselling.

611 Overall, research support for oral naltrexone as an effective treatment for opioid dependence  
612 has been lacking, as exemplified by a recently updated Cochrane systematic review and meta-  
613 analysis (68). Several studies were found that had compared oral naltrexone with or without  
614 psychosocial counselling to placebo with or without psychosocial counselling (69-71), and/or  
615 to psychosocial counselling alone (67, 72). The review concluded that naltrexone alone or in  
616 combination with psychosocial counselling reduced heroin use more than placebo with or



617 without psychosocial counselling (73). Still, this reduction was not evident when only the  
618 results from studies without psychosocial counselling were pooled. Oral naltrexone was more  
619 effective in reducing the number of re-incarcerations than psychosocial counselling alone.  
620 Oral naltrexone had no beneficial effect on heroin relapse or treatment retention in the ten  
621 RCTs.

622

### 623 **1.5.2 Extended release naltrexone**

624 The initiative to develop long-acting preparations to improve outcomes for naltrexone  
625 treatment was taken in the early 1970s (74). During the 1990s, extended-release formulations  
626 were developed, making sustained release naltrexone available for investigation in larger  
627 clinical trials. Although promising, the evidence to support its effectiveness is still scarce (75).

628 Four RCTs on two different long-acting formulations have been reported. In the first placebo-  
629 controlled trial, an injectable naltrexone intramuscular was investigated for treatment of  
630 heroin addiction (76). The injectable preparation contained 384 mg naltrexone and released  
631 naltrexone at therapeutic levels (>1ng/ml) over the course of 1 month, similar to the currently  
632 approved 380 mg VIVITROL<sup>®</sup>. Patients receiving the 384 mg intramuscular stayed in  
633 treatment longer than patients on placebo. They also provided fewer opioid positive urine  
634 samples and reported less heroin craving.

635 In Russia, a recently published study (77) investigated the efficacy of 4-week naltrexone for  
636 extended release injectable suspension(VIVITROL<sup>®</sup> 380 mg) versus placebo over a 6-month  
637 period in a randomized, double-blind design (n=250). Sustained release naltrexone had a  
638 statistically significant advantage over placebo on retention, opioid use (urine samples, self-  
639 report, and naloxone challenge), mortality, and craving. VIVITROL<sup>®</sup> has previously been  
640 approved for the treatment of alcohol dependence in 2006 and is indicated for the prevention  
641 of relapse to opioid dependence, following opioid detoxification.

642 Studies have also investigated the effectiveness of implantable pellets containing about 2.2 g  
643 of naltrexone released during 5 to 6 months (78). At follow-up 6 months after discharge from  
644 inpatient treatment, naltrexone implants as a supplement to usual aftercare resulted in  
645 significantly greater reductions in heroin use compared to usual aftercare alone. A comparable  
646 implant releasing naltrexone for 3 to 4 months was recently reported to reduce heroin use and  
647 increase treatment retention more than oral naltrexone in a double-blind, double-placebo  
648 randomised trial (79).

649 Data from all the above studies on sustained release naltrexone (SRX) suggest a satisfactory  
650 safety profile. While minor adverse effects are usually more frequent in active naltrexone  
651 groups than in non-naltrexone groups, they mainly appear during periods of peak release rates  
652 (usually the first 20% of release period). Due to an overall much lower mean release of  
653 naltrexone, the intensity of symptoms is less than that of oral naltrexone. Serious adverse  
654 events seem to occur more frequently in control conditions; however, levels do not reach  
655 significance or cannot be estimated as the typical number of study participants is about n=60

656 and mortality rates in most SRX clinical trial arms thus far has been zero. For both  
657 intramuscular naltrexone and surgically implanted pellets, some site pain following  
658 administration is the norm.

659 Office-based pain management during treatment with extended-release naltrexone may be a  
660 challenge, as the use of opioid analgesia is practically impossible. Patient cases are reported  
661 where non-opioid analgesics or a regional nerve blockade were used and provided effective  
662 analgesia (80).

663

## 664 **1.6 Drug use and the criminal justice setting**

665 The relationship between illicit drug use and criminality is well established (81). In inmate  
666 populations throughout the world substance abuse disorders are overrepresented compared to  
667 the general population (82). In the Netherlands, as many as 79% of inmates report drug use  
668 before incarceration (83) and similar rates are reported for the USA with ca. 70% (84) and for  
669 Norway with between 60 and 70% (85, 86). During incarceration, drug-involved offenders are  
670 likely to reduce the frequency of use and to change their preferred drug of abuse compared to  
671 outside of prison (87, 88). The most frequently used drugs in prison are cannabis, followed by  
672 stimulants, benzodiazepines and opioids (89).

673 In- and outside of prison, heroin users play an important part in the functioning of organized  
674 and acquisitive crime, because maintaining daily heroin use is expensive and can seldom be  
675 combined with regular employment. Thus, a high incidence of penal reactions towards the  
676 patient group is difficult to avoid. Most heroin-addicted offenders will be incarcerated at least  
677 once during their lifetime and a considerable number of them repeatedly (90, 91). For many  
678 heroin users criminal justice facilities may thus become a stable element, especially for those  
679 individuals who are unable to adjust to a non-criminal way of life. For heroin-addicted  
680 individuals, incarceration implies a major behaviour change. They are either forced by the  
681 circumstances to detoxify, or they continue injecting with high risk of acquiring blood borne  
682 diseases such as HIV and high risk of overdose, as clean needles are a scarce commodity and  
683 there is rarely enough opioids to develop tolerance (92). Following prison release, many  
684 heroin-involved inmates will relapse within the first month of returning to the community (93,  
685 94). Similarly to opioid users who have just been discharged from inpatient settings, the risk  
686 of overdose death is particularly high immediately following prison release (95, 96).

687 A lack of sufficiently targeted post-release services may play a role in the high risk of relapse  
688 and overdose. If inmates achieve abstinence during incarceration, they often fail to maintain it  
689 after prison release. Outside of prison the addicted individual may be largely unavailable for  
690 treatment, whereas during incarceration help including housing may be a clearly stated aim.

691

692 **1.6.1 Prison-based treatment of opioid dependence**

693 The unanimous conclusion of several reviews on criminal justice based treatment is that  
694 access to specialized addiction treatment services in prisons is seriously limited and that  
695 further programme evaluations are urgently needed (97-99). These reviews also find that  
696 prison-based therapeutic communities (TC) that provide continuity of care after release have  
697 shown beneficial effects. Five year follow-up data for 576 TC participants in a US study show  
698 reduced drug relapse and criminal recidivism (100). In Norway, the Tyrili foundation provides  
699 treatment for incarcerated drug users (101). In Oslo, Tyrili applicants spend nine months in a  
700 prison-based therapeutic community and after release they are offered to continue in a TC  
701 outside of prison.

702 In a Norwegian pilot study, naltrexone implants were compared with methadone maintenance  
703 and treatment commenced just before prison release. Significant reductions in heroin use at  
704 six months follow-up were found in both groups (102) and improved retention in naltrexone  
705 treatment compared to methadone maintenance. Further, the study demonstrated that long-  
706 acting naltrexone treatment is feasible in criminal justice settings with around 60% of the  
707 participants randomly allocated to naltrexone implants accepting the treatment (103).  
708 Intramuscular naltrexone that does not require surgical insertion is likely to further increase  
709 acceptability.

710 Oral naltrexone among criminal justice populations has been evaluated in two randomised  
711 trials (67, 104). Another two non-randomised trials on oral naltrexone are reported (105, 106).  
712 The Australian RCT by Shearer and co-workers struggled with low interest in participation  
713 and the trial was discontinued when the group randomly allocated to oral naltrexone failed to  
714 initiate treatment. The majority of eligible inmates in this study were already receiving OMT  
715 and were reluctant to detoxify. The other three trials unanimously conclude that oral  
716 naltrexone is a feasible option for inmates when combined with social incentives towards  
717 recovery and abstinence, e.g. work-release programmes and parole including follow-up by  
718 criminal justice staff. Although treatment dropout was high in these trials, those who stayed  
719 on oral naltrexone were less likely to relapse to heroin and less likely to engage in criminal  
720 activity.

721 Drug-involved inmates wanting to initiate treatment during incarceration will often have to  
722 make an extra effort due to a scarcity of in-prison treatment options. Nonetheless,  
723 incarceration may offer extraordinary opportunities for recovery such as a highly structured  
724 environment and reduced availability of illicit and prescription drugs.

725 OMT has been recommended for opioid dependent inmates, partly to reduce risk behaviours  
726 in prison, but also to reduce the high risk of post-release relapse and overdose death (95, 107).  
727 A French cohort study reported high risk of re-imprisonment and death at three years follow-  
728 up (108). Prison based OMT programmes need to be improved, i.e. treatment should be  
729 continued during imprisonment, and it should be initiated before release for opioid-dependent  
730 prisoners not receiving OMT (109). Nevertheless, opioid maintenance therapy is still  
731 controversial in criminal justice settings. Although OMT is increasingly used in European  
732 prisons (110), access is far from optimal in other parts of the world (111, 112). Restricted

733 access to OMT during incarceration includes highly developed countries such as the USA  
734 with a per capita prison population that is about 10-fold larger compared to Norway (113).  
735 However, a randomised-controlled trial suggested already in the 1960s that methadone  
736 maintenance (MMT) is effective to prevent relapse when initiated before prison release (114).  
737 Although prison-based methadone maintenance is available in a few US penal facilities (115),  
738 the next RCT on methadone maintenance conducted in the US criminal justice setting was  
739 reported only a few years ago (116). In this RCT, heroin addicted inmates were randomly  
740 allocated to one of three groups: methadone start and counselling before release, referral to  
741 methadone treatment after release or counselling only. At one month follow up the  
742 methadone-before-release group was more likely to continue in community treatment and  
743 more likely to provide opioid negative urine tests. This study will be followed up by a larger  
744 multi-centre trial involving sites in several US American States and by another trial that  
745 evaluates the effects of buprenorphine.

746

## 747 **1.7 Rationale for this study**

748 The overall rationale for this study is to compare the preventive effect of XR-NTX on  
749 overdose and opioid use relative to buprenorphine treatment use among opioid dependent  
750 patients about to complete their stay in a controlled environment.

751 Such a comparison with the currently recommended or standard treatment is often conducted  
752 as a routine part of phase III/IV trials for any novel medical treatment. The utility of such  
753 studies lies in their ability to inform decisions on treatment adoption on a political as well as a  
754 clinical level. Currently, buprenorphine-naloxone is the recommended first-choice treatment  
755 in many countries, and is therefore a natural comparison drug to XR-NTX. Currently, no  
756 studies have compared XR-NTX with buprenorphine-naloxone in either clinical or criminal  
757 justice settings

758 It is also the ambition of this study to highlight the potential impact of offering any  
759 pharmacological treatment to opioid dependent individuals in situations with a high risk of  
760 relapse and overdose.

761 The trial most closely resembling the present study was an open-label randomized trial by  
762 Lobmaier et al. that compared implantable naltrexone with high-level methadone programme  
763 participation among prison inmates in Norway (102, 103). Both study groups reported reduced  
764 opioid use compared to pre-treatment levels. This study was underpowered due to problems  
765 with recruitment, and attrition immediately following randomization, as well as initiating  
766 patients in the methadone group into the high-threshold methadone programme. Many of the  
767 recruitment and attrition problems are thought to have been related to the study comparison  
768 between a full agonist (methadone) and a full antagonist (naltrexone) over a time-span of six  
769 months. With less dissimilar study drugs and shorter study period, potential weaknesses of the  
770 kind seen in Lobmaier et al. (102, 103) will be addressed in the present study.

771 Other studies investigating the effectiveness of sustained release naltrexone (SRX) have been  
772 described above; none of these have compared SRX to buprenorphine-based OMT.

773 While there are several studies that have exemplified the benefit of providing medical  
774 treatment to opioid dependent individuals before discharge from prison or clinical settings  
775 (see above), WHO estimates that as many as 80% of opioid users worldwide are not in any  
776 kind of treatment – in many cases, this is due to little or no treatment being offered to users.  
777 The present study thus fills a need to continue to exemplify the benefits from more actively  
778 offering effective pharmacological interventions to opioid dependent patients in these high-  
779 risk situations.

780

781

## 782 **2. STUDY OBJECTIVES**

### 783 **2.1 Primary objective**

784 The primary objective of this study is to evaluate the effectiveness of XR-NTX 380 mg/month  
785 versus buprenorphine-naloxone 8-24 mg/day as part of “treatment as usual”, assessed by the  
786 number of opioid free oral fluid samples during the RCT period.

787 Variables supporting the primary objective are:

- 788 – Between-group differences on opioid abstinence from randomisation to Week  
789 12 as measured by proportion of weekly oral fluid samples positive for non-  
790 study opioid agonists or their metabolites
- 791 – Between-group differences from randomisation to each assessment on self-  
792 reported abstinence from illicit (e.g. non-study) opioids as measured using  
793 time-line follow-back.
- 794 – Between-group differences in retention in treatment at Week 12.
- 795 – Mortality registry data on mortality in the two groups from randomisation until  
796 Week 48.

### 797 **2.2 Secondary objectives**

798 A. To evaluate the effectiveness of XR-NTX across the different study settings (clinical  
799 settings versus criminal justice system).

800 B. To evaluate the outcome variables in the XR-NTX groups and/or buprenorphine groups  
801 compared to non-randomised, voluntary controls in criminal justice - or clinical settings.

802 C. To evaluate the safety and tolerability of XR-NTX in this study population.

803

804 D. To evaluate the effect of recovery-related variables on the primary outcomes.

805 E. Assess the impact of study medications, no medication, and/or setting on recovery-related  
806 outcomes such as craving for heroin, recidivism, morbidity, treatment for addiction or other  
807 medical problems, sleep problems, abstinence motivation, quality of life, and mental health.

808 Variables supporting the secondary objectives are:

- 809 1. Reduction in opioid-related craving in the XR-NTX group in the clinical and/or  
810 criminal justice settings compared to buprenorphine-naloxone and/or non-  
811 randomised controls by assessing:
- 812 – the change from randomisation to Week 12 in VAS score for craving
- 813 – the change from randomisation to Week 48 in VAS score for craving
- 814 2. The extent to which XR-NTX in the clinical and/or criminal justice settings reduces  
815 non-opioid substance use compared to buprenorphine-naloxone and/or non-  
816 randomised controls by assessing:
- 817 – the number of oral fluid samples positive for illicit, non-opioid substances or  
818 their metabolites from Week 1-12 in the study. This includes (but is not  
819 restricted to) cocaine, benzoylecgonine, nitrazepam, diazepam, 7-  
820 aminonitrazepam, amphetamine, metamphetamine, zopiclon, zolpidem,  
821 oxazepam, karisoprodol, diazepam, MDMA, alprazolam
- 822 – the change from randomisation to Week 12 in self-reported use of non-opioid  
823 substances including cocaine, amphetamines, benzodiazepines, alcohol,  
824 cannabis, and hallucinogenic drugs (e.g. LSD, MDMA, GHB)
- 825 3. To evaluate if XR-NTX in the clinical and/or criminal justice settings affects mental  
826 health, compared to buprenorphine-naloxone and/or non-randomised controls by  
827 assessing the change from randomisation to Week 12 in SCL-25 total or subscale  
828 scores.
- 829 4. To evaluate if XR-NTX in the clinical and/or criminal justice settings affects sleep  
830 quality, compared to buprenorphine-naloxone and/or non-randomised controls by  
831 assessing the change in Insomnia Severity Index (ISI) scores from randomisation to  
832 Week 12.
- 833 5. To evaluate if XR-NTX in the clinical and/or criminal justice settings affects rate of  
834 suicide or suicidal ideation, compared to buprenorphine-naloxone and/or non-  
835 randomised controls by assessing the proportion of patients in each group reporting  
836 suicidal thoughts, attempts, or registered suicidal AEs between randomisation and  
837 Week 12.
- 838 6. To evaluate the safety and tolerability of XR-NTX compared to buprenorphine-  
839 naloxone and/or non-randomised controls by:
- 840 – evaluation of changes from baseline in frequency of substance use and  
841 treatment attrition
- 842 – assessing the incidence of Adverse Events (AEs)

- 843           – assessing the incidence of AEs leading to withdrawal from the study
- 844           – assessing the incidence of AEs of special interest (e.g. OD, nausea, vomiting)
- 845           – assessing AEs related to insomnia
- 846           – assessing the proportion of patients reporting increase in suicidal thoughts,  
847           attempts or intentions on the Europ-ASI or that have AEs related to suicide
- 848   7.       To evaluate if XR-NTX in the clinical and/or criminal justice settings affects  
849           income from illicit sales of drugs, compared to buprenorphine-naloxone and/or non-  
850           randomised controls by assessing the change from randomisation to Week 12 in  
851           self-reported days with such income and the amount of income from these sources  
852           in Norwegian Kroner (NKR; 10 NKR = approximately 1,7 US \$).
- 853   8.       To evaluate if XR-NTX in the clinical and/or criminal justice settings affects quality  
854           of life (QOL), compared to buprenorphine-naloxone and/or non-randomised  
855           controls by assessing the change from randomisation to any assessment in total  
856           score on the Temporal Satisfaction with Life Scale (TSWLS).
- 857   9.       To evaluate if XR-NTX in the clinical and/or criminal justice settings affects  
858           motivation for abstinence compared to buprenorphine-naloxone and/or non-  
859           randomized controls by assessing the change from randomisation to Week 12 using  
860           self-reported abstinence motivation on the total or subscale levels of the Stages of  
861           Change Readiness and Treatment Eagerness Scale Drugs (SOCRATES 8D).
- 862   10.       To evaluate if XR-NTX in the clinical and/or criminal justice settings affects  
863           employment or income compared to buprenorphine-naloxone and/or non-  
864           randomized controls by assessing the change from randomisation to Week 12 in  
865           days previous month in education or paid/unpaid employment on the Europ-ASI.
- 866   11.       To evaluate if XR-NTX in the clinical and/or criminal justice settings affects  
867           frequency or type of hospitalization for medical or mental health reasons compared  
868           to buprenorphine-naloxone and/or non-randomized controls by assessing the  
869           number of hospitalizations in the Norwegian Patient Registry from randomisation to  
870           Week 48.
- 871   12.       To evaluate if XR-NTX in the clinical and/or criminal justice settings affects  
872           recidivism/re-offending compared to buprenorphine-naloxone and/or non-  
873           randomized controls by assessing the change from randomisation and/or the year  
874           preceding study randomisation to Week 48 in the Norwegian Criminal Offences  
875           Registry.
- 876   13.       To evaluate if XR-NTX in the clinical and/or criminal justice settings affects the  
877           amount of publicly available addiction treatment received (e.g. counselling, OMT)  
878           compared to buprenorphine-naloxone and/or non-randomized controls by assessing



879 the change from randomisation and/or the year preceding study randomisation to  
880 Week 48 in the Norwegian Patient Registry and/or the Norwegian Opioid  
881 Maintenance Treatment Registry.

882 14. To evaluate if XR-NTX in the clinical and/or criminal justice settings affects the  
883 frequency and/or type of medications prescribed compared to buprenorphine-  
884 naloxone and/or non-randomized controls by assessing the change from  
885 randomisation and/or the year preceding study randomisation to Week 48 in the  
886 Norwegian Prescription Registry.

887

888

### 889 **3. STUDY PLAN AND PROCEDURES**

#### 890 **3.1 Overall study design and flow chart**

891 This is a 12-week multi-centre, open-label, randomised treatment study of the clinical  
892 effectiveness and - safety of XR-NTX (VIVITROL®) 380mg/month fixed dose and  
893 buprenorphine-naloxone 8-24 mg/day flexible dose regimen in the treatment of opioid  
894 dependent patients. The randomised treatment period is followed by 36 weeks follow-up  
895 treatment period with either XR-NTX or buprenorphine-naloxone in accordance with each  
896 participant's preferences.

897 This study will be conducted in approximately 220 randomised patients in Norway to yield  
898 180 evaluable participants across two treatment settings, with 90 participants per treatment  
899 group (XR-NTX 380mg/month, and buprenorphine-naloxone 8-24 mg/day arms) in a 1:1  
900 randomisation. Participants declining medication will be offered inclusion in a non-  
901 randomised control group with a limited follow-up assessment. Approximately six study sites  
902 will participate and 15-50 patients will be recruited per study site. Number of patients per  
903 study site is expected to vary depending on patient availability at the different study sites.  
904 Additional sites may be added during the study.

905 An evaluable patient is defined as a patient who received at least one dose of study treatment  
906 and who has one valid assessment at randomisation and at least one valid oral fluid or drug  
907 use self-report assessment after randomisation.

908 The primary outcome variable is the change and/or between-group differences from  
909 randomisation (Visit 2) to Week 12 (or final visit) in opioid-free days as assessed by one of  
910 the following:

- 911 a) Number of weekly oral fluid samples (range 1-12) negative for opioids or their  
912 metabolites (e.g. heroin, 6-monoacetylmorphine, morphine, codeine, methadone).  
913 One test negative/positive will count as 7 days' abstinence or use of opioids,  
914 respectively. Buprenorphine positive samples will not count as a relapse outcome  
915 for patients treated with buprenorphine-naloxone
- 916 b) number of self-reported opioid-free days on time-line follow-back (TLFB)

917 Eligibility for the study will be assessed at enrolment and randomisation. The patients will be  
918 randomised to treatment groups at visit two, after having fulfilled all inclusion criteria and  
919 none of the exclusion criteria. See figure 1 for study flow chart, and table 1 for schedule of  
920 assessments. All visits allow a visit window of  $\pm 2$  days calculated from randomisation.

921 The study comprises three periods:

- 922 1) enrolment period of up to 30 days, see Section 3.1.2  
923 2) a 12-week randomised treatment period, see Section 3.1.3.  
924 3) a 36-week non-randomized treatment period, see Section 3.1.4.

925

926 Participants completing the first two study periods will visit the investigator at least five times,  
927 while participants completing period 3 will visit the investigator at least 14 times.

928 **3.1.2 Enrolment period (up to 30 days)**

929 To be eligible for the enrolment visit (Visit 1) the patients or inmates will be evaluated and  
930 shall:

931 – be 18 years of age or older

932 – meet the DSM-IV TR criteria for the diagnosis of opioid dependence (304.00)  
933 as confirmed by the Mini-International Neuropsychiatric Interview (MINI)

934 – Enrolled in opioid maintenance treatment (OMT) in the Norwegian national  
935 OMT program 'LAR'. For patients who complete & submit their LAR  
936 application while in a controlled environment, the investigator may complete  
937 enrolment data collection while awaiting response on LAR admission. For  
938 patients in the non-medicated comparison group, this criterion will be waived.

939 – reside temporarily and for a minimum of 7 (seven) days in either of the  
940 following controlled environments:  
941 a) an inpatient treatment facility for opioid dependent patients (detoxification,  
942 short-term, or residential/long-term) or  
943 b) in a prison or penal facility administered by the criminal justice system.

944 To be designated as a controlled environment, a restriction of access to substances  
945 of abuse at admission and during the stay must be enforced (e.g. biometric samples,  
946 personnel observation) and any such use associated with sanctions (e.g. reinforced  
947 care)

948 – planned discharge from the controlled environment is due within 30 days after  
949 Visit 1

950 **3.1.3 Twelve-week randomised treatment period (Visit 2 to Visit 13)**

951 Eligible patients will be randomised during Visit 2 to one of two treatment arms: XR-NTX  
952 380 mg/month or buprenorphine-naloxone 8-24 mg/day as add-on treatment to ongoing  
953 addiction treatment. Participants randomized to XR-NTX will need to complete detoxification  
954 from any opioid agonist (including any buprenorphine or methadone) and remain in a  
955 controlled environment for a minimum of 72 hours before the XR-NTX induction procedure  
956 (see below) is initiated. All participants will be referred to weekly counselling in cooperation  
957 with their current general or treating physician (e.g. prison medical service).

958 Patients not willing to enter these treatment arms but who satisfy remaining criteria for  
 959 inclusion will be offered inclusion into a non-randomized, non-medicated group with  
 960 quarterly assessment and follow up for up to 48 weeks according to the schedule in Table 1.

961 **3.1.4 Thirty-six-week non-randomised treatment period (Visit 14 to Visit 23)**

962 After completing 12-Week follow-up (Visit 13), participants may choose whether to continue  
 963 or change their study medication, with monthly follow-up based on psychometric data until  
 964 Week 48 (Visit 23). Shortly after Week 48 or the last feasible follow-up has been completed  
 965 for all participants entering any arm of the study, the Norwegian Mortality Registry and  
 966 Norwegian Cause of Death Registry will be contacted for collection of mortality data.  
 967 Similarly, the Norwegian Registries on Prescriptions, Criminal Offences, OMT, and the  
 968 Patient Registry will be contacted for data on recovery-related secondary variables before and  
 969 during the study.

970

971 **Figure 1. Study summary flowchart**

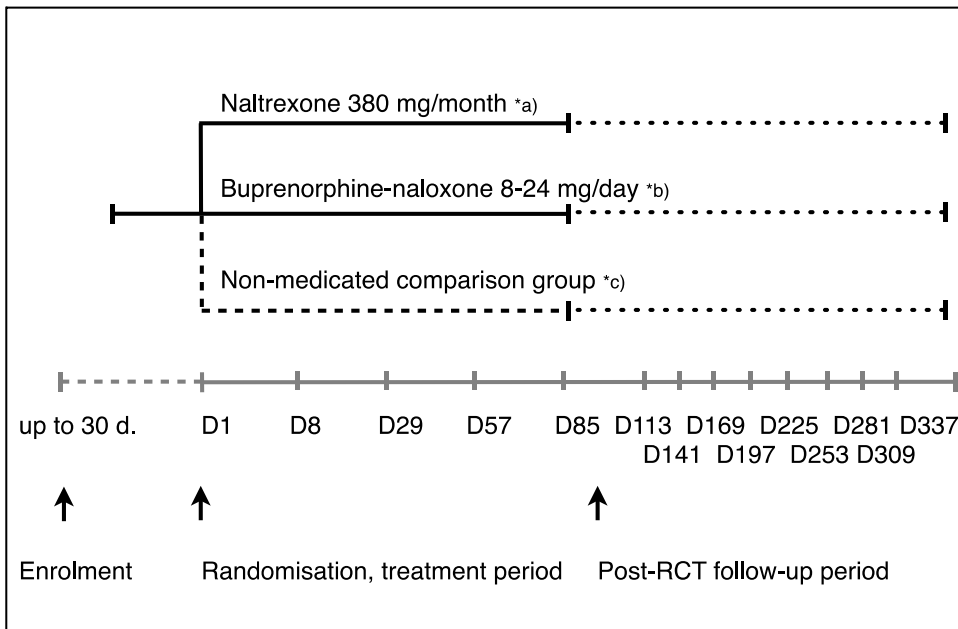

972  
 973  
 974  
 975  
 976  
 977

<sup>a</sup> Detoxification completed before monthly intramuscular administration on days 1,29,57 and up to day 309.  
<sup>b</sup> Uptitration to a level of satisfactory response before discharge: 4-8 mg/day at days 1-2, 8-12 mg/day at day 3-4, and any further increase up to maximum 24 mg/day from Day 5 and throughout the study in accordance with the National OMT 'LAR' guidelines.  
<sup>c</sup> Volunteers without pharmacological treatment or randomization to such treatment.

978 **Table 1a) Study plan and procedures 12-week randomized study period**

| <i>Task / Week no.</i>                                    | <i>Pre</i> | <i>1</i> | <i>2</i> | <i>3</i> | <i>4</i> | <i>5</i> | <i>6</i> | <i>7</i> | <i>8</i> | <i>9</i> | <i>10</i> | <i>11</i> | <i>12</i> |
|-----------------------------------------------------------|------------|----------|----------|----------|----------|----------|----------|----------|----------|----------|-----------|-----------|-----------|
| <i>Inclusion/excl crit.</i>                               | x          |          |          |          |          |          |          |          |          |          |           |           |           |
| <i>Blood pressure</i>                                     | x          |          |          |          |          |          |          |          |          |          |           |           |           |
| <i>Height, weight</i>                                     | x          |          |          |          |          |          |          |          |          |          |           |           |           |
| <i>Physician examination</i>                              | x          |          |          |          |          |          |          |          |          |          |           |           |           |
| <i>Blood health screen</i>                                | x          |          |          |          |          |          |          |          |          |          |           |           |           |
| <i>Urine drug screen</i>                                  | x          |          |          |          |          |          |          |          |          |          |           |           |           |
| <i>Pregnancy test</i>                                     | x          |          |          |          |          |          |          |          |          |          |           |           |           |
| <i>Allocation</i>                                         | x          |          |          |          |          |          |          |          |          |          |           |           |           |
| <i>Induction</i>                                          | x          |          |          |          |          |          |          |          |          |          |           |           |           |
| <i>Concomitant meds.</i>                                  | x          |          |          |          | x        |          |          |          | x        |          |           |           | x         |
| <i>Adverse events - active screening</i>                  |            |          |          |          | x        |          |          |          | x        |          |           |           | x         |
| <i>XR-NTX admin. w/ naloxone test (XR-NTX group only)</i> | x          |          |          |          | x        |          |          |          | x        |          |           |           | x         |
| <i>Europ-ASI</i>                                          | x          |          |          |          | x        |          |          |          | x        |          |           |           | x         |
| <i>Timeline follow-back</i>                               |            |          |          |          | x        |          |          |          | x        |          |           |           | x         |
| <i>MINI 6.0 Incl/excl</i>                                 | x          |          |          |          |          |          |          |          |          |          |           |           |           |
| <i>MINI 6.0 part J2</i>                                   | x          |          |          |          | x        |          |          |          | x        |          |           |           | x         |
| <i>ISI</i>                                                | x          |          |          |          | x        |          |          |          | x        |          |           |           | x         |
| <i>Socrates 8-D</i>                                       | x          |          |          |          | x        |          |          |          | x        |          |           |           | x         |
| <i>SCL-25</i>                                             | x          |          |          |          | x        |          |          |          | x        |          |           |           | x         |
| <i>TSWLS</i>                                              | x          |          |          |          | x        |          |          |          | x        |          |           |           | x         |
| <i>VAS</i>                                                | x          |          |          |          | x        |          |          |          | x        |          |           |           | x         |
| <i>Saliva sample (drugs, NTX)</i>                         |            | x        | x        | x        | x        | x        | x        | x        | x        | x        | x         | x         | x         |
| <i>Optional blood sample (drugs, NTX)</i>                 |            | (x)       | (x)       | (x)       |

980 **Table 1b) Study plan and procedures 36-week post-RCT phase (4-week follow-up)**

| Task / Week no.                                               | <u>12</u> | <u>16</u> | <u>20</u> | <u>24</u> | <u>28</u> | <u>32</u> | <u>36</u> | <u>40</u> | <u>48</u> |
|---------------------------------------------------------------|-----------|-----------|-----------|-----------|-----------|-----------|-----------|-----------|-----------|
| <i>Choice of study medication</i>                             | x         | x         | x         | x         | x         | x         | x         | x         | x         |
| <i>Concomitant meds.</i>                                      | x         | x         | x         | x         | x         | x         | x         | x         | x         |
| <i>Adverse events - active screening</i>                      | x         | x         | x         | x         | x         | x         | x         | x         | x         |
| <i>XR-NTX admin. w/ naloxone test<br/>(XR-NTX group only)</i> | x         | x         | x         | x         | x         | x         | x         | x         | x         |
| <i>Europ-ASI w/TLFB</i>                                       | x         | x         | x         | x         | x         | x         | x         | x         | x         |
| <i>&amp; MINI 6.0 part J2</i>                                 | x         | x         | x         | x         | x         | x         | x         | x         | x         |
| <i>ISI</i>                                                    | x         | x         | x         | x         | x         | x         | x         | x         | x         |
| <i>Socrates 8-D</i>                                           | x         | x         | x         | x         | x         | x         | x         | x         | x         |
| <i>SCL-25</i>                                                 | x         | x         | x         | x         | x         | x         | x         | x         | x         |
| <i>TSWLS</i>                                                  | x         | x         | x         | x         | x         | x         | x         | x         | x         |
| <i>VAS</i>                                                    | x         | x         | x         | x         | x         | x         | x         | x         | x         |
| <i>Saliva sample (drugs, NTX)</i>                             |           |           |           |           |           |           |           |           |           |
| <i>Optional blood sample (drugs, NTX)</i>                     |           |           |           |           |           |           |           |           |           |
| <i>End-of-study (EOS) for all participants</i>                |           |           |           |           |           |           |           |           | x         |

981  
982  
983  
984  
985  
986  
987  
988

989 **Table 1c) Study plan and procedures, non-medicated control patients**

| Task / Week no.                                | <u>Pre</u> | <u>12</u> | <u>24</u> | <u>36</u> | <u>48</u> |
|------------------------------------------------|------------|-----------|-----------|-----------|-----------|
| <i>Inclusion/excl. crit.</i>                   | x          |           |           |           |           |
| <i>Blood pressure</i>                          | x          |           |           |           |           |
| <i>Height, weight</i>                          | x          |           |           |           |           |
| <i>Physician examination</i>                   | x          |           |           |           |           |
| <i>Blood health screen</i>                     | x          |           |           |           |           |
| <i>Urine drug screen</i>                       | x          |           |           |           |           |
| <i>Pregnancy test</i>                          |            |           |           |           |           |
| <i>Group inclusion</i>                         | x          |           |           |           |           |
| <i>Choice of study medication</i>              |            |           |           |           |           |
| <i>Concomitant meds.</i>                       |            |           |           |           |           |
| <i>Adverse events - active screening</i>       | x          | x         | x         | x         | x         |
| <i>Europ-ASI</i>                               | x          | x         | x         | x         | x         |
| <i>MINI 6.0</i>                                | x          | x         | x         | x         | x         |
| <i>ISI</i>                                     | x          | x         | x         | x         | x         |
| <i>Socrates 8-D</i>                            | x          | x         | x         | x         | x         |
| <i>SCL-25</i>                                  | x          | x         | x         | x         | x         |
| <i>TSWLS</i>                                   | x          | x         | x         | x         | x         |
| <i>VAS</i>                                     | x          | x         | x         | x         | x         |
| <i>Saliva sample (drugs, NTX)</i>              |            |           |           |           |           |
| <i>Optional blood sample (drugs, NTX)</i>      |            |           |           |           |           |
| <i>End-of-study (EOS) for all participants</i> |            |           |           |           | x         |

991 **3.1.5      **Unscheduled visits****

992 Patients can return at any time if their condition warrants medical attention.

993 **3.2           **Rationale and risk/benefit assessment****

994 **3.2.1        **Rationale for study design, doses, and control groups****

995 This study is designed as a randomized, open-label evaluation of the clinical effectiveness and  
996 safety of XR-NTX in a context of conventional treatment of opioid dependence. The rationale  
997 for this study is based upon positive results from a number of smaller studies demonstrating an  
998 adequate treatment effectiveness for XR-NTX in opioid dependent patients across different  
999 treatment settings (see Section 1).

1000 The study is designed to compare the relapse-preventing effect of XR-NTX with other  
1001 conventional treatment modalities in patients or inmates who are in a controlled environment  
1002 and about to enter the high-risk scenario of discharge. For this study, two treatment groups  
1003 and one non-randomized comparison group will be utilised:

- 1004               – XR-NTX 380 mg/month
- 1005               – buprenorphine-naloxone tablets 8-24 mg/day
- 1006               – non-randomized, non-medicated comparison

1007

1008 **3.2.2        **Risk/benefit and ethical assessment****

1009 The study will be performed in accordance with the ethical principles that have their origin in  
1010 the Declaration of Helsinki and are consistent with ICH-GCP, and applicable regulatory  
1011 requirements.

1012 The final CSP, including the final versions of the written informed consent forms (ICF), must  
1013 be approved by the regional ethics committee (REC) in Norway, for compliance with the  
1014 Declaration of Helsinki and ICH-GCP.

1015 Progress reports and notifications of serious unexpected drug reactions will be provided to the  
1016 REC according regulations and guidelines. The Principal Investigator(s) must also provide the  
1017 REC with any reports of SAEs from the study site. In addition, study drug manufacturers will  
1018 be notified of SAEs and any relevant patient characteristics and contact with authorities.

1019



1020 **3.3 Selection of study population**

1021 **3.3.1 Study selection record**

1022 Investigator(s) must keep a record of patients who were considered for enrolment but were  
1023 never enrolled, i.e. a patient screening log. Each clinic or criminal justice facility will also be  
1024 requested to provide a reliable estimate on the number of eligible and non-eligible individuals  
1025 in their facility during the period the study was open to recruitment. This information is  
1026 necessary to establish that the patient population was selected without bias.

1027 **3.3.2 Inclusion criteria**

1028 For inclusion into the trial, each patient is required to fulfill all of the following criteria:

- 1029
- 1030 1. Capable of understanding and complying with the protocol, and sign the informed  
1031 consent document
  - 1032 2. Be 18 years of age or older
  - 1033 3. Has a current diagnosis of opioid dependence, based on the criteria of the DSM-  
1034 IV-TR
  - 1035 4. Is voluntarily seeking treatment for opioid dependence in a treatment or criminal  
1036 justice setting
  - 1037 5. Completing a stay in a controlled environment with restricted access to substances  
1038 of abuse with a minimum duration of 7 (seven) days.
  - 1039 6. Is enrolled in the Norwegian national opioid maintenance treatment program  
1040 'LAR' before discharge from a controlled environment (waived for volunteers in  
1041 the non-medication comparison group).
  - 1042 7. If female and of childbearing potential, must agree to use an acceptable method of  
1043 contraception for the duration of the study
- 1044

1045 **3.3.3 Exclusion Criteria**

1046 For the purpose of assuring patients' safety and minimizing confounding variables, any of the  
1047 following is regarded as a criterion for exclusion from the trial:

- 1048
- 1049 1. Pregnancy (ie, positive urine and/or serum pregnancy test) and/or currently  
1050 breastfeeding
  - 1051 2. Clinically significant medical condition or observed abnormalities (including:  
1052 severe hepatic (Child-Turcotte-Pugh level C) or renal failure, clinically significant  
1053 symptoms of progressive Acquired Immunodeficiency Syndrome (AIDS))
  - 1054 3. Severe psychiatric disorder (including: current or recurrent affective disorders with  
1055 suicidal behavior, psychotic disorders)
  - 1056 4. Use of any excluded medication at screening or anticipated/required use during the  
1057 study period (including: requiring treatment with opioid medications other than  
1058 study drugs)
  - 1059 5. Known intolerance and/or hypersensitivity to naltrexone, carboxymethylcellulose,  
1060 or polylactide-co-polymers (PLG) or any other components of the diluent, as well  
1061 as known hypersensitivity or intolerance to buprenorphine or naloxone or any of  
1062 the Suboxone additives. Acute alcoholism or serious respiratory debilitation.

- 1063 6. Any finding that in the view of the PI would compromise the patient's ability to  
1064 fulfill the protocol visit schedule or visit requirements  
1065 7. Employment by Alkermes or Reckitt-Benckiser (permanent, temporary contract  
1066 worker, or designee responsible for the conduct of the study) or immediate family  
1067 of an Alkermes or Reckitt-Benckiser employee  
1068

1069 At Visit 1 'inclusion', Inclusion criteria number 1-4 and Exclusion criteria 3 as listed above  
1070 must be verified. At or before Visit 2 'randomisation,' Inclusion criteria 5-7 and Exclusion  
1071 criteria 1,2, 4-7 above must be verified.

#### 1072 **3.3.4 Interactions with study medications**

1073 Should any prescribed medications interact with buprenorphine-naloxone study medication,  
1074 the dosage will be adjusted.

#### 1075 **3.3.5 Restrictions**

1076 There are no restrictions on patients participating in this study with regard to smoking,  
1077 physical activity, etc. See Section 3.6 for restricted medication and treatments.

#### 1078 **3.3.6 Discontinuation of patients from treatment or assessment**

##### 1079 **3.3.6.1 Criteria for discontinuation / End of Study**

1080 Patients may be discontinued from study treatment and assessments at any time. If possible, it  
1081 is recommended that the PI be consulted before discontinuation. Specific reasons for  
1082 discontinuing a patient from this study are:

- 1083 • Voluntary discontinuation by the patient who is at any time free to discontinue  
1084 his/her participation in the study, without prejudice to further treatment
- 1085 • Safety reasons as judged by the investigator, particularly:
  - 1086 – A clinically significant or serious adverse event (SAE) that would not be  
1087 consistent with continuation in the study, as determined by the investigator or  
1088 the patient
  - 1089 – Two consecutive blood tests showing neutrophil counts <1
  - 1090 – If the patient's hepatic status deteriorates to a Child-Turcotte-Pugh level 'C'  
1091 state and this is deemed related to study participation by the investigator
  - 1092 – An imminent risk of suicide, based on the investigator's judgement
  - 1093 – Accidents or disease developments making palliative care with opioid agonists  
1094 necessary, as evaluated by the investigator or patient

- 1095 • Severe non-compliance to CSP as judged by the investigator
- 1096 • Incorrect enrolment of the patient (i.e. the patient does not meet the required  
1097 inclusion/exclusion criteria).
- 1098 • Development of a condition included in the exclusion criteria. If possible, it is  
1099 recommended that the Principal Investigator (PI) be contacted before  
1100 discontinuation
- 1101 • Use of concomitant medication prohibited by the CSP, as described in Section 3.6.
- 1102 • The patient is unable to tolerate the assigned dose of medication
- 1103 • The patient becomes pregnant
- 1104 • The patient is lost to follow-up
- 1105 • The study is terminated by the University of Oslo, Regulatory authorities, or the  
1106 REC

#### 1107 **3.3.6.2 Procedures for discontinuation**

1108 Patients who discontinue on their own accord should always be asked about the reason(s) for  
1109 their discontinuation and the presence of any AEs. If possible, they should be seen and  
1110 assessed by an investigator(s). AEs should be followed up; questionnaires and any  
1111 investigational products should be returned by the patient.

1112 If a patient is seen by the investigator, all assessments required at the final study visit will be  
1113 conducted, whenever possible, and should be recorded on the Case Report Form (CRF). The  
1114 category in the CRF specifying the reason for discontinuation as 'Other' should only be used  
1115 when no other category is satisfactory.

1116 Any patient who withdraws and has clinically significant abnormal results for any safety  
1117 assessments should be followed up at appropriate intervals, as determined by the investigator,  
1118 until the abnormality resolves or until, in the investigator's opinion, the condition has become  
1119 stable and is unlikely to change further or the investigator has lost contact with the patient.

1120 Participants who volunteered for receiving study drug but drop out before receiving  
1121 medication without formal withdrawal of consent may be designated as a participant in the  
1122 non-medicated group after evaluation of dropout circumstances by the Principal Investigator.

1123

1124

1125 **3.4 Treatments**

1126 **3.4.1 Identity of investigational product and comparators**

1127 The allocated treatment group for the 12-week randomized period is openly communicated to  
1128 the participant following randomisation.

1129 **Table 2 Investigational products**

| Drug                   | Manufacturer           | Strength | Presentation           |
|------------------------|------------------------|----------|------------------------|
| XR-NTX                 | Alkermes Inc.          | 380 mg   | Injectable suspension  |
| Buprenorphine-naloxone | Reckitt-Benckiser Inc. | 8-24 mg  | Sublingual resorbilets |

1130  
1131 Buprenorphine-naloxone resorbilets may contain lactose, which may cause discomfort in  
1132 lactose-intolerant individuals (see Appendix B).

1133 **3.4.2 Doses and treatment regimens**

1134 XR-NTX patients receive an intramuscular injection of a naltrexone-polymer mixture into the  
1135 gluteus following enrolment and randomisation, preferably within a minimum of 2 and a  
1136 maximum of 5 days before discharge and after a minimum of 72 hours has passed after last  
1137 intake of any opioid agonist (morphine, heroin, methadone, buprenorphine, codeine etc.). A  
1138 small test dose (2-4 mg) of the short-acting opioid antagonist naloxone will be administered  
1139 before injection of XR-NTX in order to reduce the risk of inducing prolonged withdrawal. If  
1140 naloxone induces an increase in withdrawal symptoms (i.e. sweating, gastrointestinal cramps,  
1141 yawning) to a level not acceptable to the investigator or patient, injection of the next naloxone  
1142 test dose should be delayed by a buffer period of at least 24 hours depending on severity of  
1143 withdrawal. The naloxone challenge and the subsequent 380 mg XR-NTX will then be  
1144 repeated on days 29 and 58, and at monthly intervals during the follow-up period (days 85 to  
1145 337) depending upon patient preference and investigator approval. Cases of prolonged or  
1146 continued withdrawal beyond 7 days after last intake of an opioid agonist may indicate  
1147 intolerance to naloxone/naltrexone and/or motivational problems with antagonist treatment.  
1148 These patients may warrant discontinuation from the study by the investigator.

1149 Buprenorphine-naloxone will be initiated in a controlled environment if possible and  
1150 dispensed daily in accordance with local OMT (Norwegian: LAR) regimens. The tablets  
1151 should be taken sublingually by placing them under the tongue. All buprenorphine-naloxone  
1152 patients will start on their medication by receiving 4-8 mg/day dose for days 1-2, 8-16 mg  
1153 days 3-4. Target dose is 16 mg / day, with minimum dose being 8 mg/day and maximum  
1154 dosage 24 mg/day. During days 5-12, the dosage may be adjusted in accordance with this and  
1155 existing LAR guidelines (See Table 3).

1156 From day 85 onwards to day 337 post-randomisation, participants will be allowed to choose  
1157 their study medication. For participants who wish to change from buprenorphine-naloxone to  
1158 XR-NTX, and/or participants with a regular (>3 days/week) heroin use, a detoxification and

1159 discontinuation of medication for at least three days in a controlled environment will be  
1160 required before commencing XR-NTX treatment. The induction procedure with naloxone  
1161 challenge should be used as described above. Participants who wish to commence or continue  
1162 treatment with buprenorphine should be able to do so by continuing to receive treatment in  
1163 Norway's National OMT programme (LAR) at study inclusion.

1164

1165 **Table 3 Titration of investigational product & comparator**

| Treatment group / Day                                  | Naltrexone 380 mg/month                        | Buprenorphine-naloxone 8-24 mg/day                                                                    | Non-medication comparison |
|--------------------------------------------------------|------------------------------------------------|-------------------------------------------------------------------------------------------------------|---------------------------|
| Day 1-2                                                | 1 x 2 mg naloxone<br>1 x 380 mg XR-NTX / month | 4 - 8 mg buprenorphine-naloxone / day                                                                 | n.a.                      |
| Day 3-4                                                | -                                              | 8 - 16 mg buprenorphine-naloxone                                                                      | n.a.                      |
| Day 5 onwards                                          |                                                | 8 – 24 mg/day according to response                                                                   |                           |
| Day 85/week 12 and every 4 weeks until day 337/week 48 | 1 x 2 mg naloxone & 1 x 380 mg XR-NTX / month  | As day 5 onwards (above) or initiate switch to XR-NTX according to patient's wishes commencing day 85 | n.a.                      |

1166

1167 **3.4.3 Labelling**

1168 Principle investigator will provide NTX (Vivitrol®) to the study sites. Labelling of the  
1169 investigational product will be conducted in compliance with labelling instructions from the  
1170 Norwegian Medicines Agency (NOMA), the National Coordinating Investigator (PI), and  
1171 Apotekproduksjon AS (Farma Holding).

1172 **3.4.4 Storage**

1173 All investigational products must be kept in a secure place under appropriate storage  
1174 conditions. A description of the appropriate storage and shipment conditions are specified on  
1175 the investigational product label and in the IB. All documents of significant value to the trial  
1176 will be stored for a minimum of 15 years after the conclusion of the trial in accordance with  
1177 existing guidelines. Storage can be extended beyond 15 years if regulations require.

1178 **3.4.5 Accountability**

1179 The investigator is responsible for establishing routines for correct handling of investigational  
1180 product, to ensure that:

- 1181 – The investigator correctly receives deliveries of such product from the  
1182 principal investigator or designated institution, including pharmacy.
- 1183 – Accurate records are maintained, accounting for the receipt of the  
1184 investigational product and for the disposition of the product
- 1185 – Investigational product is to be handled and stored safely, properly and in  
1186 agreement with the given storage instructions
- 1187 – The investigational product is to be prescribed only by the investigator or by a  
1188 person authorised to do so by the Principal Investigator
- 1189 – Under no circumstances will the investigator allow the investigational products  
1190 to be used for other purposes than for this study
- 1191 – When dispensing investigational product to patients, this must be noted in the  
1192 dispensing record. Information recorded includes identification of the patient  
1193 to whom the product is dispensed, name of the product, strength and quantity  
1194 dispensed, date of dispensing, batch number and durability. This record must  
1195 be kept in addition to any drug accountability information recorded in the CRF  
1196 on the patient's source chart
- 1197 – The study participants will not themselves handle investigational products.  
1198 Vivitrol will be injected by investigational staff. Suboxone will be dispensed  
1199 daily.
- 1200 – The patient must return all unused investigational products to the investigator.  
1201 However, in this study such a routine will not be applicable.

1202

### 1203 **3.5 Method of assigning patients to treatment groups**

1204 After written informed consent has been obtained the patient will be assigned an Enrolment  
1205 Code (site and patient specific).

1206 Patient eligibility will be established before treatment randomisation. Patients will be  
1207 randomised strictly sequentially, as patients are eligible for randomisation. If a patient  
1208 discontinues from the study, the patient number will not be reused, and the patient will not be  
1209 allowed to re-enter the study. Patients will not be allowed to enrol twice in the study.

1210 The randomisation will be in consecutive order and site specific. A randomisation schedule  
1211 will be prepared by the Clinical Research department at the Oslo University Hospital that  
1212 utilizes electronic data entry to randomize patients in a block manner by centre and setting.  
1213 The randomisation list will be generated using a computer based randomisation system,  
1214 internally developed and validated.

1215 Eligible patients who wish to participate in the pharmacotherapy comparison will be  
1216 randomised in balanced blocks to receive XR-NTX 380 mg/month or buprenorphine-naloxone  
1217 8-24 mg/day in a 1:1 ratio.

1218 If a patient enrolment or randomisation number is allocated incorrectly, the Principal  
1219 Investigator should be notified immediately. Subsequent patient enrolment or randomisation  
1220 numbers should be allocated according to the original allocation sequence. If a randomisation  
1221 number is allocated incorrectly, no attempt should be made to change the treatment.

1222

### 1223 **3.6 Pre-study, concomitant and post-study medication(s)**

1224 Other medication, which is considered necessary for the patient's safety and well-being, may  
1225 be given at the discretion of the investigator(s) in accordance with the precautions and  
1226 interactions listed for each medication in Appendix B: Additional Safety Information. The  
1227 administration of all prescribed medications including investigational products and  
1228 medications in use within 30 days of randomisation will be recorded in the appropriate  
1229 sections of the CRF. Only medications prescribed for general (e.g. daily) use will be  
1230 registered; medications prescribed for special circumstances, e.g. to induce withdrawal and/or  
1231 reduce withdrawal symptoms during detoxification, will not be registered.

1232 Women who enter the study with an intrauterine device in place, using oral contraceptives, or  
1233 using injectable or implantable hormonal agents designed to prevent pregnancy may continue  
1234 these treatments throughout the study. The University of Oslo or other main study site will  
1235 reimburse any expenses associated with continuation or initiation of contraceptives or refer  
1236 the participant to a health service providing such treatment free of charge to the target group.

1237 Patients on methadone who are allocated to buprenorphine-naloxone will need to transfer to  
1238 the new medication in accordance with local guidelines. Methadone patients allocated to XR-  
1239 NTX will be required to discontinue methadone treatment, detoxify and undergo naloxone  
1240 challenge before commencing XR-NTX treatment following procedures described above  
1241 (Section 3.4.2).

1242 Patients who elect to participate in follow-up but decline being randomized to any of the study  
1243 medications are free to receive the medical treatment deemed suitable by their treating  
1244 physician (e.g. GP, hospital). Thus the restrictions mentioned in Table 4 and 5 apply mainly to  
1245 patients who consent to be randomized to one of the two study drugs (XR-NTX or  
1246 buprenorphine-naloxone).

1247 Patients requiring daily palliative care with opioid agonists should implement and evaluate a  
1248 transfer to non-opioid medication in collaboration with their treating physician and the  
1249 investigator before enrolling into the trial.

1250 After study completion, or discontinuation, the patient should be treated according to normal  
1251 practice.

1252 **Table 4 Prohibited pre-study medications and treatments**

| Medication or Treatment                               | Time period                    |
|-------------------------------------------------------|--------------------------------|
| Opioid agonist medications for pain, acute or chronic | 4 days prior to randomisation  |
| Naltrexone.                                           | 2 days prior to inclusion      |
| Electroconvulsive therapy (ECT)                       | 28 days prior to randomisation |

1253  
1254 Medication and treatments that are specifically prohibited or restricted during the study are  
1255 listed in Table 5.

1256 **Table 5 Concomitant medications and treatments that are prohibited, allowed**  
1257 **with restrictions, or permitted during the study**

| Use category                       | Type of medication                                                                                                                                  | Details                                                                                                                                                                                                                                                                           |
|------------------------------------|-----------------------------------------------------------------------------------------------------------------------------------------------------|-----------------------------------------------------------------------------------------------------------------------------------------------------------------------------------------------------------------------------------------------------------------------------------|
| <b>Prohibited</b>                  | Mu-opioid agonists                                                                                                                                  | Including but not limited to methadone, morphine, buprenorphine (non-study prescribed), heroin, codeine, petidine, fentanyl.                                                                                                                                                      |
|                                    | Non-study naltrexone                                                                                                                                | Includes any medication containing naltrexone other than study drugs administered according to the CSP                                                                                                                                                                            |
| <b>Permitted with restrictions</b> | Antidepressant                                                                                                                                      | One antidepressant where dosage should be stable at enrolment and remain at the same dose throughout the study. The following antidepressants are allowed:<br><br>Amitriptyline, bupropion, citalopram, duloxetine, escitalopram, fluoxetine, paroxetine, sertraline, venlafaxine |
| <b>Permitted</b>                   | Non-psychoactive medications, including over-the-counter medications, which are required to treat illness or complaints that occur during the study | May be used at the discretion of the investigator or the patient's treating- or general physician (GP)                                                                                                                                                                            |
|                                    | Other medications which are considered necessary for the patient's safety and well-being                                                            | May be given at the discretion of the investigator(s) or the patient's treating or general physician (GP). Includes medication and devices for contraception.                                                                                                                     |

1258  
1259 **3.7 Treatment compliance**  
1260 Compliance will be discussed at each study visit and assessed based on reported diversion of  
1261 study medication. Patients judged to be non-compliant may continue in the study, but should  
1262 be counselled on the importance of taking their study medication as prescribed. Patients who  
1263 are repeatedly or severely non-compliant may, at the investigator's discretion, be  
1264 discontinued, see Section 3.3.6.



1265 **3.8 Psychosocial treatment and care recommended to all participants**

1266 The Norwegian model for socialized medicine ensures that a basic set of services is provided  
1267 to all citizens, with extra services provided for targeted groups like the physically or mentally  
1268 disabled, psychiatric patients, or people with drug dependence. The basic services guaranteed  
1269 by federal legislation includes among others:

- 1270 - Medical care by the GP or at any relevant hospital
- 1271 - Free medication and specialized addiction counselling when an expense  
1272 threshold of about 1900 NKR is exceeded. This includes expenses for e.g.  
1273 HIV/AIDS and Hep-C medication
- 1274 - Covering of medication and counselling expenses below the above threshold for  
1275 those with a clear need for the intervention but who are unable to pay
- 1276 - Housing with caretaking at the level appropriate for the individual
- 1277 - Low-threshold health services including (among others) health check-ups by  
1278 outreach physicians, outreach counselling services, low-threshold OMT  
1279 programmes with buprenorphine-naloxone, needle exchanges, injection rooms
- 1280 - Case management is highly recommended for patients in the addiction  
1281 population
- 1282 - Free OMT with agonist medication of their choice (methadone, buprenorphine,  
1283 or buprenorphine-naloxone) in the National LAR program. Program enrolment  
1284 includes reinforced rights to counselling, housing, and case management
- 1285 - Free access to inpatient addiction treatment services including detoxification  
1286 and long-term rehabilitation, subject to availability when applying for treatment  
1287 at a specific treatment facility
- 1288 - Free in-prison addiction treatment services in several prisons, with transitional  
1289 residence (halfway-house type) before release

1290 The general physician (GP) is considered the main coordinating body of all health services for  
1291 permanent residents of Norway. The GP thus has special privileges to refer to specialized  
1292 addiction treatment like psychotherapy or OMT. In the present study, the GPs of all  
1293 participants will be contacted for information regarding participation in the study with a  
1294 recommendation that their patient is referred to once-weekly counselling/psychotherapy and  
1295 case management as soon as possible.

1296

1297 **4. MEASUREMENTS OF STUDY VARIABLES AND**  
1298 **DEFINITIONS OF OUTCOME VARIABLES**

1299 **4.1 Primary variable**

1300 The primary variables are

- 1301 a) the differences between medication groups in proportion of opioid-free oral fluid  
1302 samples from randomisation to Week 12
- 1303 b) differences in post-discharge mortality between medicated and non-medicated  
1304 groups
- 1305 c) retention (see page 4)

1306 Outcome variable a) is used as the basis for the sample size calculation found in Section 6.5.

1307

1308 **4.2 Screening and demographic measurements**

1309 Written informed consent must be provided before conducting any study specified  
1310 procedures. The following data will be collected at enrolment (Visit 1; see also Table 1):

1311

1312 – Informed consent (original, signed ICF is source data)

1313 – Inclusion and exclusion criteria

1314 – Date of birth, sex, race and ethnicity

1315 – DSM-IV diagnosis of opioid dependence (304.00) as confirmed by the MINI

1316 – Relevant prior and concomitant medication

1317 – Height and weight

1318 – Psychiatric measurements (MINI)

1319

1320

1321

1322

1323 **4.3 Patient-Reported Outcomes (PRO)**

1324 The methods for collecting PRO data are presented below. The data will be collected in the  
1325 appropriate sections of the CRF.

1326 Table 6 shows how the PRO variables of this study relate to the study objectives and  
1327 outcomes. The schedule of each assessment in time is listed in Table 1.

1328 **Table 6 Patient-reported outcomes objectives and variables relating to each**  
1329 **objective**

| Objective                                                                                                                                   | Variable                                                                                      |
|---------------------------------------------------------------------------------------------------------------------------------------------|-----------------------------------------------------------------------------------------------|
| <b>Secondary objective</b>                                                                                                                  | <b>Secondary variable</b>                                                                     |
| To evaluate how XR-NTX compared to buprenorphine-naloxone or no study medication affects quality of life of patients with opioid dependence | Change from randomisation to each monthly assessment on Temporal Satisfaction With Life score |
| To evaluate how XR-NTX compared to buprenorphine-naloxone or no study medication affects abstinence motivation or cognition                 | Change from randomisation to Week 12 on Socrates 8D score                                     |
| To evaluate how XR-NTX compared to buprenorphine-naloxone or no study medication improves sleep quality in patients with opioid dependence  | Change from randomisation to each monthly assessment on Insomnia Severity Index score         |
| To evaluate XR-NTX compared to buprenorphine-naloxone or no study medication on heroin-related craving                                      | Change from randomisation to each monthly assessment on a Visual Analogue Scale               |
| To assess the subjective effects of opioid intake in XR-NTX treatment compared to buprenorphine-naloxone or no study medication             | Between-group differences in Visual Analogue Scale (VAS) ratings of opioid agonist effects    |

1330  
1331 Appropriate procedures for minimising bias and enhancing compliance will be followed  
1332 throughout the study. The investigator and/or delegate at each site will be responsible for the  
1333 PRO evaluation and a standardised procedure for the administration of the PRO  
1334 questionnaires will be applied. The patients will complete the questionnaires independently,  
1335 so that the responses reflect the patient’s perception and views rather than those of family,  
1336 friends, staff or others.

1337 Each centre will have a designated quiet space in the clinic for patients to complete the  
1338 questionnaires at each visit. The questionnaires should be completed prior to other  
1339 examinations, before there are substantial professional encounters with transmission of  
1340 information, such as disease status. Such information may influence the answers that patients  
1341 provide on questionnaires. The order of administration of questionnaires will be: VAS,  
1342 Socrates 8D, TSWLS, SCL-25 and the ISI.

1343 A University of Oslo representative will be trained to evaluate the quality of the PRO  
1344 assessments and alert sites to possible problems in this component of the clinical study.

1345

1346 **4.3.1 The Temporal Satisfaction With Life Scale (TSWLS)**

1347 **4.3.1.1 Methods of assessment**

1348 The TSWLS will be completed at scheduled visits during the study by each patient. The  
1349 instrument has been developed to measure differences in degree of enjoyment and satisfaction  
1350 (117). The short form used in this study has 5 items, comprising the ‘present’ items of the  
1351 original instrument. Higher scores on the 1-7 Likert scale for each item (range of total score:  
1352 5-35) indicate better subjective quality of life. The instrument is sensitive to change over time  
1353 following treatment. It has been found to have high internal consistency, test-retest reliability,  
1354 and concurrent validity in a wide range of patients, non-patients, cultures, and settings.

1355 **4.3.1.2 Derivation or calculation of outcome variable (TSWLS)**

1356 The TSWLS total score is derived by summing scores on item 1-5 for a minimum score of 5  
1357 and a maximum score of 35. For all TSWLS scores, calculations can be made both on basis of  
1358 change from randomization and/or direct study group comparisons.

1359 **4.3.2 Insomnia Severity Index (ISI)**

1360 **4.3.2.1 Methods of assessment**

1361 The ISI (118) will be completed at scheduled visits during the study by each patient. The 5-  
1362 item scale is a reliable, valid and standardised screening measure of sleep difficulties. The  
1363 patient rates each problem-related item on a 0-4 Likert scale.

1364 **4.3.2.2 Derivation or calculation of outcome variable (ISI)**

1365 The 5 self-rated items will be used to gain a sense of the extent of sleeping difficulties in each  
1366 participant group. The patient rates each problem-related item on a 0-4 Likert scale. The ISI  
1367 global score is calculated as the sum of the 5 items. Clinical cut-offs exist that have been  
1368 validated in sleep-problem populations. The changes from randomisation will be calculated as  
1369 the visit score minus the randomisation score. Between-group differences at any study point or  
1370 between-group changes may be calculated.

1371 **4.3.3 Stages of Change Readiness and Treatment Eagerness Scale – Drugs**  
1372 **(SOCRATES-8D)**

1373 **4.3.3.1 Methods of assessment**

1374 The Socrates-8D will be completed at scheduled visits during the study by each patient. The  
1375 Socrates-8D is a self-administered instrument to measure recognition of drug problems and  
1376 willingness to change in illicit drug users (119). The 19 items of the Socrates-8D are used to  
1377 measure three dimensions of abstinence motivation: a) Recognition of addiction problems b)  
1378 Ambivalence towards improvement c) Taking steps towards improvement. All 19 items in the  
1379 Socrates-8d are scored on a 5-point scale. Higher scores on all items indicate higher  
1380 abstinence motivation.

1381 **4.3.3.2 Derivation or calculation of outcome variable (Socrates-8D)**

1382 Socrates 8-D sub-scales include recognition, ambivalence, and taking steps. A Socrates 19-  
1383 item total score will be calculated. Higher scores indicate a higher level of abstinence  
1384 motivation. The change from randomisation will be calculated as the visit score minus the  
1385 randomisation score. Between-group differences or differential developments in Socrates 8D  
1386 scores will be calculated at any assessment.

1387 **4.3.4 Heroin effect, craving, & treatment satisfaction (VAS)**

1388 **4.3.4.1 Methods of assessment**

1389 The VAS will be completed at scheduled visits during the study by each patient. This Visual  
1390 Analogue Scale consists of several 0-100 mm items that are self-administered to measure a)  
1391 craving for heroin b) effect of any opioid agonists used during treatment c) the extent to which  
1392 patients are satisfied with their current treatment and would recommend it to a friend. The  
1393 craving item is derived from previous investigations (76, 77) finding that a rating of the  
1394 statement 'I need heroin' seems to have a higher extent of validity than other formulations.  
1395 The items reporting on heroin effects are derived from a previous study challenging  
1396 naltrexone blockade with increasing dosages of morphine or placebo (120). Although VAS are  
1397 becoming more frequent, the scoring by making a mark on a 0-100 line will need to be  
1398 demonstrated in order to ensure that the patient fully comprehends VAS.

1399 **4.3.4.2 Derivation or calculation of outcome variable (VAS)**

1400 The outcomes from the VAS sheet will be analysed separately: craving, treatment satisfaction,  
1401 propensity to recommend current treatment, and opioid/heroin effects. Each of the items on  
1402 the VAS sheet can be analysed separately as independent variables. Thematically related  
1403 variables may also be combined for analyses as appropriate. The change from randomisation  
1404 will be calculated as the visit score minus the randomisation score. Between-group differences  
1405 or differential developments in VAS scores can be calculated for any assessment.

1406 **4.3.5 Hopkins' Symptom Checklist 25 (SCL-25)**

1407 The SCL-25 will be completed at scheduled visits during the study by each patient. The  
1408 Symptom Checklist 25 (121) is a self-administered instrument to measure severity of mental  
1409 distress. The 25 items of the SCL-25 are scored on a 4-point scale and summed to calculate  
1410 total score of distress. The items include 15 depression-related items and 10 anxiety-related  
1411 items, which can be scored separately. Higher scores on all items indicate a higher level of  
1412 distress, and a higher score on each subscale indicates a higher level of depression and anxiety  
1413 respectively. The SCL-25 preserves the depression and anxiety items from the original 90-  
1414 item Hopkins' Symptom Checklist.

1415 **4.3.5.1 Derivation or calculation of outcome variable (SCL-25)**

1416 The outcomes from the SCL-25 will be analysed as a total score (range: 25 - 100) and/or  
1417 subscale scores for depression and/or anxiety. Each score (total, depression, anxiety) can be  
1418 analysed separately as independent variables. The change from randomisation will be

1419 calculated as the visit score minus the randomisation score. Between-group differences or  
1420 differential developments in SCL scores can be calculated for any assessment.

1421

#### 1422 **4.4 Health Economic measurements and variables.**

1423 This is not applicable for the current study.

1424

#### 1425 **4.5 Pharmacokinetic measurements and variables**

1426 For timing of individual pharmacokinetic samples, refer to the study plan (Table 1) specific to  
1427 this CSP. Biological samples are collected in two types of settings with different procedures:  
1428 Inclusion blood samples and pregnancy tests are collected and analyzed in the controlled  
1429 environment (inpatient clinic, prison) according to standard procedures on site. The second  
1430 setting occurs when patients are discharged from their controlled environment and are tested  
1431 on a weekly basis during Week 1-12 (see Table 3); saliva samples are used to collect  
1432 information on recent drug use and naltrexone levels, ideally with a blood sample (5 mg)  
1433 taken simultaneously to validate the saliva naltrexone analysis. The samples should be  
1434 properly taken, handled, labelled and shipped in accordance with the instructions provided.  
1435 The methods for collection of biological samples and derivation of pharmacokinetic variables  
1436 are presented below in Sections 4.5.1 and 4.5.2.

##### 1437 **4.5.1 Determination of drug concentration in biological samples**

1438 The following sample handling procedures must be followed to avoid jeopardising the  
1439 subsequent determination of both study drug and any psychotropic drug or selected metabolite  
1440 concentrations in human plasma or oral fluid. All samples will be taken using aseptic  
1441 technique. Samples taken at follow-up for measurement of drug and metabolite  
1442 concentrations will be analysed using fully validated bioanalytical methods by The Norwegian  
1443 Institute of Public Health, Division of Forensic Toxicology and Substance Abuse. The  
1444 methods used will be detailed in the clinical study report (CSR).

##### 1445 **4.5.1.1 Collection of biological samples**

1446 For biological samples collected at inclusion/randomization, standard on-site clinical  
1447 procedures will be utilized. Pre-medication (e.g. inclusion/exclusion criteria) samples at or  
1448 preceding Visit 1 & 2 are collected in an inpatient or prison setting and analysed according to  
1449 local standards & procedures. Biological samples at follow-up (from Week 1 onwards  
1450 following discharge from controlled environment) may be collected at any PI-approved  
1451 location (e.g. GP office, outpatient clinic, local hospital, pharmacy). Routine follow-up  
1452 samples will be collected and shipped in a uniform manner at all study sites in accordance  
1453 with instructions provided by the FHI, who receive, store and analyse the samples in  
1454 accordance with national guidelines. Oral fluid samples are collected using kits provided by  
1455 the PI in collaboration with the FHI and are mandatory for all randomized participants during

1456 weeks 1-12 of the study. A scratchcard incentive may be offered to participants following  
1457 each oral fluid sample in order to reduce the likelihood of noncompliance. Venous blood  
1458 samples (5 mL) will be collected from a subset of volunteer patients alongside the oral fluid  
1459 samples in order to verify the oral fluid analyses. Using aseptic technique, a venous blood  
1460 sample will be collected from a forearm vein (or other vein) into a 5-mL EDTA evacuated  
1461 blood collection tube at visits specified in table 1. When sampling from veins is not possible,  
1462 capillary blood may be used instead; this must be noted in the CRF and on the Specimen  
1463 Shipment Form. Blood and oral fluid samples will be collected, labelled and shipped as  
1464 detailed below and further directed by the PI in collaboration with the FHI.

1465 For samples taken at the discretion of the investigator or treating physician to investigate AEs  
1466 on an as-needed basis, the necessary analyses and procedures will be determined on-site. The  
1467 PI may be consulted regarding AE analyses, and must be consulted if extra analyses from the  
1468 FHI are considered necessary.

#### 1469 **4.5.1.2 Labelling of pharmacokinetic samples**

1470 The labels for the polypropylene tubes should be wrapped with transparent tape (or laminate  
1471 supplied with the label) to ensure that the labels remain attached to tubes during processing  
1472 and shipment. The labels must maintain their integrity despite being in contact with moisture.  
1473 The labels should not be obscured or extend over the tube, and no additional labels should be  
1474 attached to the sample tube. Labels used for inclusion & AE analyses on-site will adhere to  
1475 site standards for labelling of clinical samples. Labels for follow-up samples will be prepared  
1476 and supplied by the designated laboratory at the Norwegian Institute of Public Health (FHI)  
1477 for all tubes and containers used to collect oral fluid. Samples will be collected locally, sealed  
1478 and shipped by mail with a Specimen Shipment Form to the FHI. Only FHI-supplied  
1479 envelopes and Specimen Shipment Forms should be used for the oral fluid – and blood  
1480 samples collected during this phase of the trial. Each FHI label will include a bar code  
1481 corresponding to a designated column on the Specimen Shipment Form.

1482 The randomisation number, time of last dose, time of any concomitant psychotropic drugs,  
1483 date and time of sample collection will also be recorded on the appropriate CRF.

#### 1484 **4.5.1.3 Shipping of pharmacokinetic samples**

1485 As the samples collected are utilized as part of the participants' clinical treatment, the  
1486 Specimen Shipment Form includes patients' personal data, name and medical license ID # of  
1487 the investigating physician/investigator, as well as boxes specifying sample matrix (e.g. saliva,  
1488 blood), date, time and comments. Enrolment samples follow local site conventions with regard  
1489 to shipment, analysis, and inclusion of results in medical records/EPJ.

1490 All shipments of diagnostic or potentially infectious substances should be made in accordance  
1491 with all applicable regulations. It is the responsibility of the investigational site to ensure that  
1492 each specimen is classified, packaged, labelled, marked, and documented in compliance with  
1493 all applicable regulations.

1494 See Table 9 for the total amount of blood to be drawn from each subject throughout the study.

1495 **4.5.2 Drug concentration measurements, and derivation or calculation of**  
1496 **pharmacokinetic parameters**

1497 Samples for measurement of drug and metabolite concentrations will be analysed using fully  
1498 validated bioanalytical methods including MS-MS “fingerprint” technology. The methods  
1499 used will be detailed in the clinical study report (CSR).

1500

1501 **4.6 Effectiveness measurement and variables**

1502 The following effectiveness scales are utilised in this study and will be rated by the  
1503 investigator or delegate, according to the schedule of events in Table 1, Section 3.

1504 To ensure consistency throughout the study, all site personnel administering the Europ-ASI  
1505 will receive training in conducting these assessments and must be approved by the PI before  
1506 they take part in this study by inter-rater reliability tests. To reduce scoring variability, it is  
1507 recommended that the same rater conduct all assessments for a given patient for a specific  
1508 scale.

1509 Europ-ASI, TLFB, and MINI will be integrated into one interview whenever possible in order  
1510 to minimize the test burden on participants.

1511 In the event that the primary site rater is not available, a designated back-up rater may perform  
1512 the rating. The back-up rater must meet the same qualifications as the primary rater and be  
1513 authorised by the Principal Investigator to conduct the ratings.

1514 The scores in each of the scales will be recorded on the appropriate sections of the CRF.  
1515 Signs and symptoms revealed and recorded during the ratings should only be reported as AEs  
1516 if they fulfil the criteria for a SAE or are the reason for discontinuation from treatment with  
1517 the investigational product.

1518 The methods for collecting effectiveness data are described below. The shorter effectiveness  
1519 rating scales are integrated into the larger structured interview Europ-ASI when possible  
1520 (pending approval from the Norwegian Europ-ASI Certification Authority).

1521 **4.6.1 Oral fluid/saliva samples as outcome measures**

1522 The outcome from the oral fluid samples will be measured as dichotomous outcomes, e.g.  
1523 above or below a clinically significant threshold or the level of detection (LOD) for each  
1524 substance. The primary outcome is the number of opioid-free oral fluid samples during Weeks  
1525 1-4, 5-8, 9-12, or 1-12: The number of oral fluid samples negative for non-study opioids or  
1526 their metabolites will be subtracted from the total number of samples (n=12) to yield a  
1527 proportion of negative samples. Other substances may be analysed as secondary outcomes in a  
1528 similar manner. For XR-NTX patients, analyses will include measurements of levels of



1529 naltrexone or metabolites that will be compared to the expected dosage trajectory and/or blood  
1530 samples taken concurrently with one or more saliva samples.

1531 Between-group differences at any assessment, as well as within- or between-group change  
1532 from randomisation to each assessment may be calculated.

#### 1533 **4.6.2 Addiction Severity Index, European Version (Europ-ASI)**

##### 1534 **4.6.2.1 Methods of assessment**

1535 The Europ-ASI version 5 is a 40-90 minute structured interview that assesses demographics,  
1536 physical health, work & education, substance use & treatment, criminal activity, and social  
1537 functioning (122). History on these topics is assessed during the first Europ-ASI interview,  
1538 administered at inclusion, while follow-up interviews (monthly for participants receiving  
1539 medication) will assess present functioning only. Pending approval by the Norwegian Europ-  
1540 ASI Certification Authority, the Europ-ASI will be modified to integrate other relevant  
1541 instruments when possible. The main types of outcome assessments for the different outcomes  
1542 in the sections of the Europ-ASI are: a) days of last 30 days (range: 0-30) b) frequency of use  
1543 where 0 = no use, 1 = used 1-3 times per month, 2 = used 1 – 3 times per week, and 3 = daily  
1544 almost daily use (range: 0-3) c) number of months occurrence of the outcome in question  
1545 during the total number of months in the last observation period (in this study a range of 0-3,  
1546 0-12, or 0-1) d) dichotomous outcomes (0/1).

1547 Each rater administering the Europ-ASI must receive training and certification on the use of  
1548 the Europ-ASI and must be approved by the PI before they take part in the study.

##### 1549 **4.6.2.2 Derivation or calculation of outcome variable (Europ-ASI)**

1550 Although it is possible to calculate a total or composite score from the Europ-ASI, single item  
1551 scores or section composite scores will be preferred. For any relevant outcome from the  
1552 Europ-ASI, between-group differences at any assessment and within- or between-group  
1553 change from randomisation to each assessment may be calculated.

#### 1554 **4.6.3 Mini Neuropsychiatric Interview (MINI)**

##### 1555 **4.6.3.1 Methods of assessment**

1556 The MINI is a structured screening interview for DSM-IV diagnoses (123). As an outcome  
1557 measure in the present study, only section L from the MINI will be used to assess whether  
1558 participants satisfy criteria for opioid dependence as a dichotomous outcome (Yes/No) when  
1559 three criteria or more are satisfied. In addition, scores may be calculated for this study based  
1560 on number of criteria satisfied (range: none to seven criteria).

1561 The study design requires that follow-up assessments of opioid dependence criteria modify the  
1562 time window of assessment - from the original DSM-IV criteria of any occurrence during the  
1563 past 12 months to the study period in question (e.g. previous month or previous 3 months).

1564 **4.6.3.2 Derivation or calculation of outcome variable (MINI)**

1565 The MINI section L score for opioid dependence will be calculated as a) satisfying or not  
1566 satisfying 3 or more of the 7 criteria for DSM-IV opioid dependence and/or b) number of  
1567 criteria satisfied (range: 0-7).

1568 For fulfilment of opioid dependence criteria on the MINI, between-group differences at any  
1569 assessment and within- or between-group change from randomisation to each assessment may  
1570 be calculated.

1571 **4.6.4 Time-Line Follow-Back (TLFB)**

1572 **4.6.4.1 Methods of assessment**

1573 TLFB is a data collection method aimed at maximizing the accuracy of retrospective interview  
1574 data (124): the patient is asked to remember on which days a specific substance was used  
1575 today, yesterday, the day before that etc. By cueing the patient in this way, satisfactory levels  
1576 of reliability and validity can be achieved, permitting an approximate of any variations in  
1577 timing of substance use within a given time period in addition to its frequency.

1578 TLFB will be used to assess participants' substance use during the follow-up period at  
1579 monthly intervals, yielding ranges of 0-30 days' of use for alcohol (heavy (>3 week for  
1580 intoxication) and any use), opioids, benzodiazepines, other sedatives, amphetamines, cocaine,  
1581 cannabis, and other drugs.

1582 **4.6.4.2 Derivation or calculation of outcome variable (TLFB)**

1583 For TLFB data on substance use, between-group differences at any assessment and within- or  
1584 between-group change from randomisation to each assessment may be calculated. In addition,  
1585 frequency or presence/absence of use of one or more specific substances during different  
1586 periods of the study may be calculated.

1587 **4.6.5 Registry data for mortality, morbidity, medical treatment, recidivism,  
1588 prescription medications**

1589 Relevant registries (see Table 3) will be consulted after Week 48 on the frequency and/or type  
1590 of registered outcome data during the study and (except mortality) up to one year before  
1591 randomisation.

1592 **4.6.5.1 Derivation or calculation of outcome variable (registries)**

1593 For registry data on mortality, morbidity, recidivism, medical treatment, or prescription  
1594 medications, between-group differences at any assessment and within- or between-group  
1595 change from randomisation to each assessment may be calculated. In addition, frequency or  
1596 presence/absence of use of one or more specific substances during different periods of the  
1597 study may be calculated. Change from the year before to the year during treatment or the year  
1598 following treatment may be calculated.

1599

1600

1601 **4.7 Safety measurements and adverse events as outcomes**

1602 In addition to being used for safety monitoring (see Section 10: Safety Assessments) adverse  
1603 events (including AEs, SAEs & SUSARs) are outcomes that may differ between study groups.

1604

1605 Table 7 shows how the safety variables of this study relate to the study objectives.

1606

1607 **Table 7 Safety objectives and variables relating to each objective**

| Objective                                                                                                                                                       | Variable                                                                                                                                                                                                                                                                                                                            |
|-----------------------------------------------------------------------------------------------------------------------------------------------------------------|-------------------------------------------------------------------------------------------------------------------------------------------------------------------------------------------------------------------------------------------------------------------------------------------------------------------------------------|
| To evaluate the safety and tolerability of XR-NTX compared to buprenorphine-naloxone or no study medication in the treatment of patients with opioid dependence | Incidence of adverse events (AEs)<br>Incidence of AEs leading to withdrawal<br>Incidence of AEs of special interest (overdose)<br>Proportion of patients reporting suicidal intent on the Europ-ASI at any time after randomisation or an AE of suicidality/suicidal ideation/suicide attempts/suicide completion (see Section 4.6) |

1608

1609 Safety and tolerability outcomes will be evaluated using mainly descriptive statistical  
1610 methods. The methods for collecting safety data are described in Section 9.

1611 **Other Significant Adverse Events (OAE)**

1612 Significant AEs of particular clinical importance, other than SAEs and those AEs leading to  
1613 discontinuation of the patient from study treatment, will be classified as OAEs. OAEs will be  
1614 identified by the investigators and if applicable also by the Study Team Physician during the  
1615 evaluation of safety data for the CSR. Examples of these are marked laboratory abnormalities,  
1616 and certain events that lead to intervention (other than those already classified as serious),  
1617 dose reduction or significant additional treatment. For each OAE, a narrative may be written  
1618 and included in the CSR.

1619

1620 **4.7.4 Laboratory safety measurements and variables**

1621 **4.7.4.1 Methods of assessment**

1622 Blood specimens will be collected for laboratory analysis according to Table 1. A designated  
1623 laboratory will process these samples and results will be reported back to the clinic.

1624 All samples should be taken by adequately trained study personnel, and performed and  
1625 handled in accordance with given instructions. Results on all safety laboratory values will be  
1626 reported to the Study site within three days after the analyses by the designated laboratory.  
1627 The investigator should make an assessment of the available results with regard to clinically  
1628 significant abnormalities. Up-to-date reference ranges will be provided during the study and  
1629 laboratory results will be compared to the laboratory standard normal ranges and flagged if  
1630 they are outside the normal range. The investigator or designee should make an assessment of  
1631 the available results with regard to clinically significant abnormalities. The paper copy should  
1632 be signed and retained at the site as source data for laboratory variables. Results can also be  
1633 stored in the patient's EPJ on site for future reference.

1634 Laboratory tests can be repeated if assessment at enrolment is abnormal and deemed clinically  
1635 significant by the investigator. Results must be reviewed prior to randomisation to ensure  
1636 patient meets eligibility requirements.

1637

1638 **Table 8 Laboratory measurements**

| <b>Haematology</b>                 | <b>Clinical chemistry</b>          | <b>Urinalysis</b>           |
|------------------------------------|------------------------------------|-----------------------------|
| B-Haemoglobin                      | S-Creatinine                       | U-Glucose                   |
| B-Haemoglobin glycosylated (HbA1c) | S-Bilirubin, total                 | U-Blood                     |
| B-Hematocrit                       | S-Alkaline phosphatase             | U-Protein                   |
| B-Erythrocyte count                | S-Alanine aminotransferase (ALT)   | U-Leukocytes                |
| B-Leukocyte count                  | S-Aspartate aminotransferase (AST) | UTS for substances of abuse |
| B-Leukocyte differential count     | S-Potassium                        | Pregnancy test              |
| B-Platelet count                   | S-Sodium                           |                             |
|                                    | S-Calcium (Bicarbonate)            |                             |

1639 B=whole blood; S=serum; P=plasma; U=urine <sup>a</sup> Serum pregnancy test are conducted at enrolment.

1640

1641 All enrolment laboratory assessments must be completed before randomisation takes place.

1642 Volumes of blood samples to be taken are described in Table 9.

#### 1643 **Urine samples**

1644 Urinalysis (blood, protein and leukocytes), including a UTS for substances of abuse, will be  
1645 performed at enrolment and results available before randomization (Visit 2). Substances of  
1646 abuse included in the screening are: amphetamines, barbiturates, cannabinoids, cocaine,  
1647 benzodiazepines, and opioids. The UTS is part of a general assessment for the presence of

1648 substance abuse disorders. The initial UTS is often expected to be positive, meaning patients  
1649 will not be excluded from the study on the basis of a positive UTS.

#### 1650 **Management of neutropenia**

1651 CBC including WBC differential count will be performed for all patients. CBC with a WBC  
1652 differential should also be performed at any time a patient presents with a fever, pharyngitis  
1653 (sore throat), or other signs and symptoms of infection. Patients should be instructed to seek  
1654 medical care if they develop symptoms of infection such as fever and/or pharyngitis and  
1655 mucous membrane ulceration. If signs and symptoms of the low neutrophil count are present,  
1656 e.g., infection, these should be recorded as an AE. If a patient has a neutrophil count of  
1657  $<1.0 \times 10^9/L$ , the test should be repeated according to local procedures. If the second  
1658 neutrophil count remains  $<1.0 \times 10^9/L$ , the patient should be discontinued from treatment with  
1659 the study medication due to AE, see Section 3.3.6. The AE should be recorded as "Neutrophil  
1660 count decreased". These patients should be monitored weekly with a CBC and a WBC  
1661 differential until their counts recover. While experiencing neutropenia, patients should avoid  
1662 invasive procedures such as dental work, rectal exams or enemas, exposure to people who are  
1663 obviously ill, and exposure to fresh fruits, vegetables, or flowers. If a patient develops fever  
1664 or symptoms of infection, he/she should contact his or her physician and acquire a CBC with  
1665 differential immediately.

#### 1666 **4.7.4.2 Derivation or calculation of outcome variables**

1667 For all laboratory variables, descriptive statistics will present change in laboratory  
1668 measurements over the study period. Enrolment assessment will be considered baseline for all  
1669 laboratory analyses where follow-up samples have been taken to analyse AEs, while for  
1670 follow-up assessments (FHI analyses) the sample collected during Week 1 following  
1671 discharge will be considered baseline.

1672 Changes from baseline to subsequent visits will be calculated as the visit value minus the  
1673 enrolment value. Changes from baseline to subsequent visits will be summarised for each  
1674 variable and treatment group. Laboratory test results will also be compared to the laboratory  
1675 reference ranges and the values that are outside the applicable reference range will be flagged  
1676 as high (H) or low (L). Treatment emergent laboratory changes identified by comparing  
1677 results or changes from baseline to standard extended reference ranges will be flagged at the  
1678 patient and test level.

1679

#### 1680 **4.7.5 Vital signs and physical examination**

##### 1681 **4.7.5.1 Methods of assessment**

1682 A physical examination, height weight, and vital signs, including sitting blood pressure and  
1683 pulse, will be measured according to table 1. A physician will conduct the complete physical  
1684 examination at the enrolment visit.

1685 Weight will be measured in kilograms (kg). During the weight assessment, the patient should  
1686 be wearing light clothes and no shoes. The same scale should be used for all site assessments.  
1687 Height will be measured in centimetres (cm).

#### 1688 **4.8 Volume of blood sampling and handling of biological samples**

1689 The total volume of blood that will be drawn from each patient in this study is as follows:

**Table 9 Volume of blood to be drawn from each patient at enrolment / Pre-inclusion phase (inpatient)  
(Visit 1-2, Day -30 to 0, Week -4 to 0)**

| Assessment |                                    | Sample volume (mL) | No. of samples | Total volume (mL) |
|------------|------------------------------------|--------------------|----------------|-------------------|
| Safety     | Clinical chemistry <sup>a, b</sup> | 5                  | 2              | 10                |
|            | Haematology <sup>b</sup>           | 4                  | 1              | 4                 |
| TOTAL      |                                    |                    | 4              | 24                |

1690 <sup>a</sup> Sampling for lipids are included in the clinical chemistry volume.

1691 <sup>b</sup> May be repeated if needed, at the discretion of the investigator.

1692

1693 The maximum total volume will not exceed 50 mL (inclusive of repeated tests).

1694 The designated laboratory will provide detailed instructions of all laboratory procedures,  
1695 handling and shipment of laboratory samples before the study start. The samples should be  
1696 properly taken, handled, labelled and shipped in accordance with the instructions provided by  
1697 the designated laboratory (e.g. on-site or FHI instructions).

1698 At follow-up, sites and participants will be encouraged to provide FHI with a 5-10 ml blood  
1699 sample (1-2 tubes) with each oral fluid sample in order to assist FHI validation of naltrexone  
1700 medication measurements in oral fluid. Providing blood for these samples is not mandatory  
1701 for participants, but beneficial to confirm the reliability of analyses of medication levels. For  
1702 blood samples taken for this purpose, labelling, shipment procedures and - equipment are  
1703 identical to that of the mandatory oral fluid samples. This procedure is described in 4.5.

#### 1704 **4.8.1 Analysis of biological samples**

1705 For biological samples collected at inclusion/randomization, the samples will be analysed at  
1706 the hospital laboratory according to local procedures on site. For biological samples collected  
1707 at follow-up (e.g. post inclusion, randomization & discharge from controlled environment),  
1708 procedures from FHI will be adhered to. For samples taken at the discretion of the investigator  
1709 or treating physician to investigate AEs on an as-needed basis, the necessary analyses and  
1710 procedures will be determined on-site. The investigator may be consulted regarding AE  
1711 analyses, and must be consulted if extra analyses from the FHI are considered necessary.

#### 1712 **4.8.1.1 Clinical chemistry samples**

1713 The analyte stability limits defined by the designated laboratory will be applied to all analyses  
1714 performed on behalf of the project owner / principal investigator. The designated laboratory  
1715 will not analyse samples that fall outside these stability limits. Analytical data will not be

1716 reported if found to have been derived from a sample that fell outside these stability limits.  
1717 The designated laboratory will inform the PI of the stability limits relevant to this study before  
1718 the first patient gives informed consent to take part in the study.

## 1719 **5. DATA MANAGEMENT**

1720 Data will be entered in the CRFs at the investigational site. Trained study personnel will be  
1721 responsible for entering data on the observations, tests and assessments according to the CRF  
1722 instructions. The CRF instructions will also provide the study site with data entry  
1723 instructions. When data have been entered and reviewed / edited by a CRO, the site  
1724 investigator will be notified and sign the CRF copy, and data will be locked to prevent further  
1725 editing. A copy of the CRF will be provided to the investigational site after the study database  
1726 has been locked and will be archived at the investigational site.

1727 Data checks will be run and data validation performed by the National Coordinating  
1728 Investigator (PI), delegate, or CRO. The investigator should answer any queries arising from  
1729 such checks during the whole study including the clean-file process.

1730 AEs will be classified according to the terminology of the CTCAE, see Section 9.  
1731 Concomitant medications will be classified according to the Anatomical Therapeutic  
1732 Chemical (ATC) system and the Committee of Proprietary Medicinal Products (CPMP) route  
1733 of administration dictionary.

1734 Data will be cleaned on a regular basis by a designated partner. Clean file for the final  
1735 database will be declared by the principal investigator after all data have been set to clean.  
1736 Prior to declaring clean file, all decisions on the evaluability of the data from each patient  
1737 must have been made and documented.

1738 The Data Management Plan (DMP) will provide information on data flow, timelines and all  
1739 data management activities planned for the study, including responsibilities for the personnel  
1740 involved in the processes. CROs will be used for handling clinical assessments and laboratory  
1741 data and the results will be sent to a designated partner as SPSS or – compatible datasets.

1742

1743 **6. STATISTICAL METHODS AND DETERMINATION OF**  
1744 **SAMPLE SIZE**

1745 **6.1 Statistical evaluation - general aspects**

1746 A comprehensive Statistical Analysis Plan (SAP) will be prepared and finalised prior to  
1747 database lock. The final version of the SAP will be attached as an appendix to the clean file  
1748 document.

1749 **6.2 Description of outcome variables in relation to objectives and**  
1750 **hypotheses**

1751 **6.2.1 Primary objective, hypotheses, and outcome variables**

1752 The primary objective of this study is to evaluate the effectiveness of XR-NTX 380 mg/month  
1753 versus buprenorphine-naloxone 8-24 mg/day as part of “treatment as usual”, assessed by the  
1754 number of opioid free oral fluid samples during the treatment period from randomization to  
1755 Week 12.

1756 The primary hypotheses are as follows:

- 1757 - XR-NTX (380 mg/month) is superior to buprenorphine-naloxone (8-24 mg/day) in  
1758 the mean number of oral fluid samples negative for opioid agonists (other than  
1759 study drug) or their metabolites from randomization until Week 12.
- 1760 - XR-NTX (380 mg/month) is superior to buprenorphine-naloxone (8-24 mg/day) in  
1761 increasing self-reported abstinence from illicit (e.g. non-study) opioids measured  
1762 as number of days abstinent on time-line follow-back
- 1763 - XR-NTX (380 mg/month) is superior to buprenorphine-naloxone (8-24 mg/day) in  
1764 retention in treatment at Week 12 as measured by comparing the number of  
1765 patients left and/or calculating the proportion of patients retained in each group.
- 1766 - XR-NTX (380 mg/month) is superior to buprenorphine-naloxone (8-24 mg/day) in  
1767 reducing the number of patients qualifying for an Opioid Dependence Diagnosis on  
1768 the DSM-IV TR (304.00 except the 12-month criteria) as measured using the  
1769 MINI.
- 1770 - Any study drug (XR-NTX 380 mg/month or buprenorphine-naloxone 8-24  
1771 mg/day) is superior to no study drug on preventing mortality as measured by the  
1772 number of patients deceased from randomisation until Week 48 according to  
1773 Norway’s National Mortality Registry.

1774



1775 **6.2.2 Secondary objectives, hypotheses, and outcome variables**

1776 **6.2.2.1 Secondary objective of particular interest**

1777 A secondary objective of particular interest is to evaluate if XR-NTX (380 mg/month) reduces  
1778 heroin craving compared to or buprenorphine-naloxone (8-24 mg/day). The secondary  
1779 hypotheses are as follows:

- 1780 - XR-NTX (380 mg/month) is superior to buprenorphine-naloxone (8-24  
1781 mg/day) in reducing craving for heroin from randomisation to each monthly  
1782 assessment until Week 12 as measured on a visual analogue scale (VAS).

1783 **6.2.2.2 Other secondary objectives: Effectiveness**

1784 Another secondary objective of this study is to evaluate the effectiveness of XR-NTX versus  
1785 buprenorphine-naloxone, or both of these drugs versus no study drugs, within or between  
1786 clinical and criminal justice settings. The secondary hypotheses are as follows:

- 1787 - Any study drug (XR-NTX 380 mg/month or buprenorphine-naloxone 8-24mg/day)  
1788 will be superior to no study drug on:
- 1789 - Morbidity at 48 Weeks post randomization/inclusion as measured by data from the  
1790 Norwegian Patient's Registry.
- 1791 - Criminal re-offending as measured by the number of offences registered at Week 48  
1792 in Norway's National Criminal Offense Registry and/or self-report.
- 1793 - XR-NTX (380 mg/month) is superior to buprenorphine-naloxone (8-24 mg/day) in  
1794 increasing Quality of Life from randomisation until Week 12 as measured using  
1795 the Temporal Satisfaction With Life Scale.
- 1796 - XR-NTX (380 mg/month) is superior to buprenorphine-naloxone (8-24 mg/day) in  
1797 reducing non-opioid substance use as measured by the number of oral fluid samples  
1798 positive for illicit, non-opioid substances or their metabolites from Week 1-12 in the  
1799 study or in self-reported use of (or abstinence from) non-opioid substances  
1800 including cocaine, amphetamines, benzodiazepines, alcohol, cannabis, and  
1801 hallucinogenic drugs (e.g. LSD, MDMA, GHB).
- 1802 - XR-NTX (380 mg/month) is superior to buprenorphine-naloxone (8-24 mg/day) in  
1803 reducing drug-related needle use as measured by the number of days needle use  
1804 reported from randomization to Week 12 on time-line follow-back.
- 1805 - XR-NTX (380 mg/month) is superior to buprenorphine-naloxone (8-24 mg/day) in  
1806 reducing income from illicit sales of drugs as assessed by the change from  
1807 randomisation to Week 12 in self-reported days with such income and/or the total  
1808 amount of income from these sources in Norwegian Kroner (NKR; 10 NKR =  
1809 approximately 1,7 US \$). The Europ-ASI will be used for this outcome.

1810 - XR-NTX (380 mg/month) is superior to buprenorphine-naloxone (8-24 mg/day) in  
1811 reducing frequency of injecting drug use as assessed by the change from  
1812 randomisation to Week 12 in self-reported days with such use and/or the total use of  
1813 needles in days during each month on the Europ-ASI.

1814 - XR-NTX (380 mg/month) is superior to buprenorphine-naloxone (8-24 mg/day) in  
1815 reducing frequency blood-borne disease risk behaviours as assessed by the change  
1816 from randomisation to Week 12 in self-reported needle use habits for each month  
1817 on the Europ-ASI.

1818 A secondary objective of this study is to evaluate if XR-NTX in the clinical and/or criminal  
1819 justice settings affects motivation for abstinence compared to buprenorphine-naloxone and/or  
1820 non-randomized controls by assessing the change from randomisation to Week 12 in self-  
1821 reported abstinence motivation on the total or subscale levels of the Stages of Change  
1822 Readiness and Treatment Eagerness Scale Drugs (SOCRATES 8D). The secondary  
1823 hypotheses are:

1824 - XR-NTX (380 mg/month) is superior to buprenorphine-naloxone (8-24 mg/day) in  
1825 increasing motivation for abstinence at Week 12 as measured by Total score on the  
1826 SOCRATES 8D.

1827 - XR-NTX (380 mg/month) is superior to buprenorphine-naloxone (8-24 mg/day) in  
1828 increasing recognition of addiction problems at Week 12 as measured by increased  
1829 scores on the recognition subscale on the SOCRATES 8D.

1830 - XR-NTX (380 mg/month) is superior to buprenorphine-naloxone (8-24 mg/day) in  
1831 increasing the reported effort towards abstinence at Week 12 as measured by the  
1832 Taking Steps subscale on the SOCRATES 8D.

1833 - XR-NTX (380 mg/month) is superior to buprenorphine-naloxone (8-24 mg/day) in  
1834 increasing motivation for abstinence at Week 12 as measured by a reduction on the  
1835 ambivalence subscale of the SOCRATES 8D.

1836

### 1837 **6.2.2.3 Other secondary objectives: Quality of Life**

1838 A secondary objective of this study is to evaluate if XR-NTX (380 mg/month) improves  
1839 quality of life of patients with Opioid Dependence, compared to buprenorphine-naloxone or  
1840 no study medication. The hypothesis regarding TSWLS total score, a secondary variable of  
1841 particular interest, is specified in 6.2.2.2. The other secondary quality of life hypothesis is:

1842 - XR-NTX (380 mg/month) is superior to buprenorphine-naloxone (8-24  
1843 mg/day) in increasing the TSWLS overall quality of life score from  
1844 randomisation to Week 12.

1845 A secondary objective of this study is to evaluate if XR-NTX (380 mg/month) improves  
1846 satisfaction with medication compared to buprenorphine-naloxone or no study medication.  
1847 The secondary hypothesis is as follows:

- 1848 – XR-NTX (380 mg/month) is superior to buprenorphine-naloxone (8-24  
1849 mg/day) in increasing the VAS satisfaction with medication score at Week 12.

#### 1850 **6.2.2.4 Other secondary objectives: Safety**

1851 A secondary objective of this study is to evaluate the safety and tolerability of XR-NTX  
1852 compared to buprenorphine-naloxone and/or non-randomised controls in the treatment of  
1853 patients with Opioid Dependence. The following assessments will be performed:

- 1854 – Incidence of AEs (including AEs leading to discontinuation or study  
1855 withdrawal)
- 1856 – Incidence of AEs of special interest (overdose)
- 1857 – Incidence of AEs related to insomnia as measured on the ISI
- 1858 – Evaluation of changes from baseline in relapse rates, severity of substance use,  
1859 and treatment attrition
- 1860 – Incidence of patients reporting increase in suicidal intent or attempts on the  
1861 Europ-ASI at any time after randomisation or an AE related to suicidality.

1862

#### 1863 **6.2.2.5 Other secondary objectives: Pharmacokinetics**

- 1864 – As the pharmacokinetic data of the study drugs are well-known, the collection  
1865 of pharmacokinetic data will be limited to detecting the presence of naltrexone  
1866 in XR-NTX patients using weekly oral fluid samples from randomisation to  
1867 Week 12. A pre-defined threshold based on previous studies will be used to  
1868 detect levels above or below the estimated minimum therapeutic plasma level  
1869 of naltrexone (1 ng/mL). Blood samples will be collected alongside saliva  
1870 samples from a subset of volunteer patients when possible and shipped to the  
1871 FHI.

#### 1872 **6.2.2.6 Other secondary objectives: Other registry data**

1873 A secondary objective of this study is to evaluate the recovery-relevant outcomes of medical  
1874 treatment including hospitalization, recidivism, prescribed medications, counselling and OMT  
1875 during XR-NTX compared to buprenorphine-naloxone and/or non-randomised controls in the  
1876 treatment of patients with Opioid Dependence. The following assessments may be performed:

- 1877 – Number of prescriptions as total number or by subtype (e.g. mental health, anti-  
1878 retrovirals, etc)
- 1879 – Number of counselling sessions or treatment periods
- 1880 – Number and types of hospitalisations for which medical reasons
- 1881 – Treatment episodes in the National OMT Program outside the scope of the  
1882 study and medication type (e.g. methadone, buprenorphine)
- 1883 – Recidivism (type and numbers of criminal offences)
- 1884 – Death during the study or after end of study

1885 **6.3 Description of analysis sets**

1886 All data analyses, both primary and secondary, will be performed using at least one of the  
1887 following analysis sets:

- 1888 – The safety population will include all randomised patients who took at least  
1889 one dose of study medication, classified according to the treatment actually  
1890 received.
- 1891 – The intention-to-treat (ITT) population will include all patients who were  
1892 included and randomised to a treatment, regardless of whether first treatment  
1893 dose was received or not. This population includes all drop-outs regardless of  
1894 duration of participation.
- 1895 – The modified intention-to-treat (MITT) population (Full Analysis Set) will  
1896 include all randomised patients, classified according to randomised treatment,  
1897 who received at least one dose of study treatment and who have at least one  
1898 valid assessment after randomisation. Data from the MITT population will be  
1899 used for analysis of the effectiveness objectives.
- 1900 – The per-protocol (PP) population, a subset of the MITT population, will  
1901 include patients who completed the study treatment with no major protocol  
1902 violations or deviations affecting effectiveness. Data from this population will  
1903 be used as a consistency check for analysis of the primary objective.

1904 **6.4 Method of statistical analysis**

1905 **6.4.1 General aspects**

1906 Missing data will be imputed using a Last Observation Carried Forward (LOCF) approach.  
1907 Patients with post randomisation data will have their last study assessment carried forward as  
1908 the final assessment for analyses. These will serve as accurate estimates since the patients  
1909 could be expected to get better over time. Analyses on Observed Cases (OC) will be  
1910 performed to study the robustness of the results.

1911 Baseline values, collected at randomisation or enrolment, will be defined as the last non-  
1912 missing value prior to receiving first dose of study treatment.

1913 Descriptive statistics including frequency tables (including n, mean, median, standard  
1914 deviation, minimum and maximum for continuous variables and n, frequency and percentage  
1915 for categorical values) and graphs will be provided for all variables, as well as for the changes  
1916 from baseline within each treatment and the differences between the treatment groups at each  
1917 visit, for both OC and LOCF, as appropriate.

1918 For simplicity, the treatment groups will hereafter be referred to as XR-NTX 380 mg,  
1919 buprenorphine-naloxone 8-24 mg, and non-medicated; however, all treatment groups may also  
1920 have ongoing follow-up “as usual”.

1921 **6.4.2 Multiplicity**

1922 For the confirmative strategy, a step-wise sequential testing procedure will be used for  
1923 handling multiple comparisons such that the overall significance level of 0.05 is preserved.  
1924 First the primary outcome variable the number of opioid free saliva samples from  
1925 randomisation to Week 12 will be tested for the naltrexone versus the suboxone group.

1926 All statistical tests will be two-sided with a significance level of 5%, i.e.  $\alpha=0.05$  unless  
1927 otherwise specified. Secondary analyses will report nominal 5% levels of significance, but p-  
1928 values will be displayed primarily to aid the interpretation of results. No adjustments for  
1929 multiplicity will be made for these secondary analyses. Where appropriate, model-based point  
1930 estimates will be presented together with their 95% confidence intervals. Unless otherwise  
1931 stated the interest will separately focus on the treatment differences between the groups.

1932

1933 **6.4.3 Primary variable**

1934 An analysis of variance (ANOVA) model for between-groups differences at Week 12 in the  
1935 number of opioid-positive oral fluid samples will be used. Study drug groups (XR-NTX 380  
1936 mg/month or buprenorphine-naloxone 8-24 mg/day) will be compared, and also compared  
1937 separately or collectively (as a ‘medication’ group) to participants not receiving any study  
1938 drug. The model will include treatment, centre and setting as explanatory variables. Centre  
1939 will be treated as a random effect while all other explanatory variables will be treated as fixed  
1940 effects. Model-based point estimates, 95% confidence intervals and p-values will be reported.

1941 Similar analyses will be performed for the primary objectives of opioid abstinence and opioid-  
1942 free days at Week 12. Joint analyses of study groups across the two study settings may be  
1943 performed. The change in opioid use or abstinence from randomisation to Week 12 will be  
1944 presented by descriptive statistics. Models based on analysis of regression or mixed models  
1945 may be utilized if statistical properties of the data (e.g. distribution) suggests this will provide  
1946 a more accurate or correct result.

1947 For the primary objectives of mortality, number of patients retained, and satisfying DSM-IV  
1948 criteria for Opioid Dependence, a chi-square analysis will be used to assess the Odds Ratio  
1949 (OR), and/or the Hazard Ratio (HR), Relative Risk (RR), and/or the Number Needed to Treat.  
1950 In the main statistics, 95% confidence intervals and p-values will be reported.

1951 For the confirmatory strategy, comprising the primary objective and the secondary objective  
1952 in Section 6.4.4, adjustment for multiplicity will be handled according to Section 6.4.2.

#### 1953 **6.4.4 Secondary variable of particular interest**

1954 A statistical analysis similar to the one described in Section 6.4.3 will be performed for the  
1955 craving total score from randomisation to Week 12. Baseline total score will be used as a  
1956 covariate in the model. Model-based point estimates, 95% confidence intervals and p-values  
1957 will be reported. For the confirmatory strategy, comprising the primary objective and the  
1958 secondary objectives of particular interest, adjustment for multiplicity will be handled  
1959 according to Section 6.4.2.

#### 1960 **6.4.5 Other secondary variables**

##### 1961 **6.4.5.1 Non-opioid substance use**

1962 The change in the non-opioid substance use from randomisation to each assessment will be  
1963 analysed using a similar model to that described for the primary variable. The interest will  
1964 separately focus on the treatment differences between each dose of XR-NTX injections (each  
1965 month). All assessments will be reported as point estimates and 95% confidence intervals. P-  
1966 values will only be reported for the Week 12 assessment (as described in Section 6.4.3).

1967 Response and remission at Week 12, defined from whichever is reported earliest in the oral  
1968 fluid samples and/or TLFB, will be analysed utilising logistic regression or ANOVA models.  
1969 The models will include treatment, centre and setting as explanatory variables. The interest  
1970 will separately focus on the treatment differences between XR-NTX, buprenorphine-naloxone  
1971 and non-medicated patients. Model-based point estimates of odds ratios, corresponding 95%  
1972 confidence intervals and p-values will be reported.

##### 1973 **6.4.5.2 Visual Analogue Scales**

1974 Visual Analogue Scales (VAS) are used to assess the secondary objectives of heroin craving  
1975 and satisfaction with treatment. The between-groups differences in VAS total scores at Week  
1976 12 will be analysed using an a similar model to that described under the primary analysis.  
1977 Baseline VAS score may be used as a covariate in the model. The interest will separately  
1978 focus on the treatment differences between each study group (XR-NTX, buprenorphine-

- 1979 naloxone, or no study drug). Model point estimates, 95% confidence intervals and p-values  
1980 will be reported.
- 1981 The change in VAS score and sleep disturbance factor score from randomisation to Week 12  
1982 may be presented by descriptive statistics.
- 1983 **6.4.5.3 SOCRATES-8D**
- 1984 The between-groups differences in the SOCRATES 8D score at Week 6 will be analysed  
1985 using an ANOVA model, following the same conventions as the primary analysis. Baseline  
1986 SOCRATES score may be used as a covariate in the model. The interest will separately focus  
1987 on the treatment differences between the study groups (XR-NTX, buprenorphine-naloxone, or  
1988 no study drug). Model-based point estimates, 95% confidence intervals and p-values will be  
1989 reported. SOCRATES subscales will be analysed in a similar manner.
- 1990 **6.4.5.4 Registry data on morbidity, prescriptions and criminal offences**
- 1991 The registered occurrences on each participant in the National Norwegian Registries on  
1992 Criminal Records, Hospitalizations and Prescriptions from randomisation to Week 48 will be  
1993 analysed using an ANOVA model, following the same conventions as the primary analysis.  
1994 Baseline reported hospitalizations, criminal offences, or prescriptions may be used as a  
1995 covariate in the model. The interest will separately focus on the treatment differences  
1996 between each dose of XR-NTX and other study groups (buprenorphine-naloxone and no study  
1997 drug). All assessments will have model-based point estimates and 95% confidence intervals  
1998 reported.
- 1999 **6.4.5.5 TSWLS**
- 2000 Change in TSWLS total score from randomisation to week 12 is a secondary variable of  
2001 particular interest and the analysis is discussed in Section 6.4.4. The changes in TSWLS  
2002 overall quality of life from randomisation to Week 12 will be presented by descriptive  
2003 statistics.
- 2004 **6.4.6 Safety analyses**
- 2005 **6.4.6.1 Physical examinations, laboratory assessments, and vital signs**
- 2006 All laboratory test results and vital signs results will be summarised using descriptive statistics  
2007 each time collected for raw numbers and change from randomisation/ enrolment.
- 2008 For laboratory assessments and vital signs number and proportion of patients with clinically  
2009 important values emerging during treatment phase will be presented for each treatment arm.  
2010 In addition, for laboratory values shift tables with the number and proportion of patients in  
2011 each category (below normal, normal and above normal) at end of treatment by baseline  
2012 category will be presented.

2013 **6.4.6.2 Adverse events**

2014 AEs that lead to premature withdrawal of patients from treatment with investigational product  
2015 will be tabulated for each treatment group. Descriptive statistics of incidence rates will be  
2016 used to evaluate AEs (including SAEs, AEs leading to withdrawal, overdose and deaths if  
2017 any), and reasons for study early withdrawal.

2018 Selected CTCAE terms will be aggregated to look at AEs of special interest. The areas of  
2019 special interest will include substance-induced overdose as reported by the patient on Europ-  
2020 ASI or as recorded in registry databases (Mortality registry, Cause of Death registry). The  
2021 CTCAE terms will be specified in the SAP.

2022 **6.4.6.3 Waist circumference**

2023 Not applicable for this study

2024 **6.4.6.4 ISI**

2025 Change in the ISI total score from randomisation to each assessment may be summarised with  
2026 descriptive statistics and analysed similar to the primary objective.

2027 **6.4.6.5 SCL-25**

2028 The changes in SCL-25 from randomisation to Week 12 may be presented by descriptive  
2029 statistics whether or not the change is found to be statistically significant.

2030 **6.4.6.6 Suicidality**

2031 The proportion of patients reporting suicidal intent on the Europ-ASI or an AE related to  
2032 suicidality at any time after randomisation will be presented with descriptive statistics (i.e.,  
2033 percent and number of patients). Patients already fulfilling these criteria at randomisation will  
2034 not be included in this table. AEs will be presented as a special grouping of AEs in the same  
2035 manner as other special groups of AEs previously described.

2036 If a sufficient number of suicidality-related events are recorded, analysis of suicidality will be  
2037 performed using a suicidality classification system similar to the one established by Columbia  
2038 University.

2039 **6.4.7 Pharmacokinetics**

2040 The presence of naltrexone and 6-beta naltrexol in XR-NTX patients will be monitored using  
2041 weekly oral fluid samples from randomisation to Week 12. A pre-defined threshold based on  
2042 previous studies will be used to detect levels above or below the estimated minimum  
2043 therapeutic plasma level of naltrexone (1 ng/mL). Analyses of pharmacokinetic data will only  
2044 be conducted on data from patients who provide valid oral fluid samples from randomisation  
2045 to Week 12. Voluntarily collected blood samples may be used to validate oral fluid data on  
2046 pharmacokinetics. Findings will be reported descriptively. Pharmacokinetic data may be used  
2047 as a basis for analysis of primary or secondary outcomes.



2048

## 2049 **6.5 Determination of sample size**

2050 The sample size calculation in this exploratory study was done to model the event that XR-  
2051 NTX demonstrates superior effectiveness over buprenorphine-naloxone with respect to the  
2052 primary outcome variable, differences in opioid-negative oral fluid samples from  
2053 randomisation to Week 12 – a total of 12 oral fluid samples. The lack of precedent for the  
2054 study in the literature means that parameters in the sample size determination are based on  
2055 studies with a different design than the present study (see Section 1: Introduction).  
2056 Nonetheless, their similarities with the present study mean they constitute the best available  
2057 basis for sample size determination.

2058 The minimum sample size was estimated by assuming that participants receiving XR-NTX  
2059 will achieve opioid-negative samples on a mean of 7 out of the total 12 samples, while  
2060 participants receiving buprenorphine-naloxone will deliver a mean of 4 opioid-negative  
2061 samples. The estimates assume a 95% significance level ( $p < .05$ ) and a standard deviation of 3  
2062 in both medication groups. A power (beta) set to 90%, a sample size of 17 patients/medication  
2063 arm will be sufficient, or  $n=34$  total. Missing samples will be counted as positive in an ITT-  
2064 manner.

2065 Sample size calculations were based on information from previous studies of buprenorphine-  
2066 naloxone showing attrition of about 50% in the first months following discharge from criminal  
2067 justice settings. Attrition in the naltrexone group is based on previous studies with sustained  
2068 release naltrexone in Norwegian settings showing only about 5% attrition.

2069 Target sample size was calculated based on the assumption that one or several parameters will  
2070 deviate from the above estimated values. To exemplify such deviations any adjustment could  
2071 be made to any parameter (e.g. decreased power, less attrition in groups); in the present  
2072 calculation of target sample size a hypothesized increase in the standard deviation of the mean  
2073 number of opioid-negative samples from the above 3 (s.d.: 3) to 4 (s.d.: 4). Retaining the other  
2074 parameters from the minimum-size calculation, this yields a sample size of  $n=36$  per  
2075 medication group. When worst-case assumptions are made corresponding to an average of  
2076 20% of outcomes being somehow lost or corrupted (e.g. sample contamination from as yet  
2077 unknown reasons), target sample size is adjusted to  $n=45$  per medication group, or  $n=90$  for  
2078 two groups. In addition, there are two settings in which the trial is anticipated to be conducted:  
2079 clinical treatment and criminal justice settings respectively. Although participants from  
2080 different settings may be combined for statistical power in a final analysis, it is the ambition of  
2081 the study to recruit  $n=90$  in each of these two settings, or  $n=180$  total.

2082 For mortality outcomes, 12-month mortality is assumed to reach 4 deaths per 1000 patient-  
2083 years in the medication groups, while the non-medication groups is assumed to reach a mean  
2084 of 40 per 1000 p.y. Assuming a 95% significance level ( $p < .05$ ) and a 10% chance of  
2085 committing a Type II error (beta: 90), the sample size needed to attain significance will be  
2086  $n=45$  in each group, or  $n=90$  total. As this outcome consists of registry-based data collection  
2087 across settings, adjustments for contamination or attrition have not been conducted.

2088

2089 The target sample size for the study is thus  $n=220$ , based on the  $n=180$  calculated for  
2090 medication groups and  $n=45$  volunteering for non-medicated participation. The precise target  
2091 figure may be adjusted during the study, and the group comparisons made may be adjusted  
2092 after data collection.

2093

2094 **Table 10 Minimum sample size for the RCT**

| Parameter                                                 | As specified    |
|-----------------------------------------------------------|-----------------|
| Power                                                     | 90%             |
| Anticipated difference to be detected compared to control | 3               |
| Standard deviation                                        | 3               |
| Significance level (p)                                    | 0.05            |
| Sample size (evaluable)                                   | 17 patients/arm |

2095

## 2096 **6.6 Interim analyses**

2097 No interim analyses are planned. Regular analyses will be performed 1) after completion of  
2098 the randomized trial, and 2) separate analyses performed for the non-randomized part of the  
2099 study. In addition, more regular analyses may be performed following the conclusion of the  
2100 trial, in particular (but not restricted to) after collection of data from national registries /  
2101 databases.

2102

## 2103 **6.7 Data and safety monitoring board**

2104 No data and safety monitoring board will be set up for this study. Internal review of ongoing  
2105 safety issues will be handled by the study team.

2106

2107

2108

2109 **7. STUDY MANAGEMENT**

2110 **7.1 Monitoring**

2111 The study is conducted in accordance with ICH-GCP and is subject to monitoring confirm  
2112 GCP compliance.

2113 Before the first patient is randomized into the study, a representative of the study team will  
2114 visit the investigational study site to:

- 2115 • determine the adequacy of the facilities
- 2116 • discuss with the investigator(s) (and other personnel involved with the study) their  
2117 responsibilities with regard to CSP adherence. This will be documented in a  
2118 Clinical Study Agreement (CSA) between the principal Investigator and the site  
2119 investigator(s)
- 2120 • discuss where data regarded as source data will be recorded, e.g., medical records,  
2121 CRF and associated documents. This will be documented in a CSA between  
2122 Principle Investigator and the site investigator(s)

2123 During the study, a monitor from the Regional Clinical Trial Support Team for the relevant  
2124 regional health authority will have regular contacts with the study site, including visits to:

- 2125 • provide information and support to the investigator(s)
- 2126 • confirm that facilities remain acceptable
- 2127 • confirm that the investigational team is adhering to the CSP, that data are being  
2128 accurately recorded in the CRFs, and that investigational product accountability  
2129 checks are being performed
- 2130 • perform a source data verification (SDV), that is a comparison of the data in the  
2131 CRFs with the patient's medical records at the treatment or justice facility and other  
2132 records relevant to the study. This will require direct access to all original records  
2133 for each patient (e.g., clinic charts).

2134 The monitor or another study team representative will be available between visits if the  
2135 investigator(s) or other member of the study staff need information and advice. A contract  
2136 detailing the outcomes, endpoints, and number of inspections will be signed by the National  
2137 Coordinating Investigator (PI) or delegate and the monitoring service before inclusion  
2138 commences.

2139

2140 **7.2 Audits and inspections**

2141 A member of the study group or a regulatory authority may visit the centre to perform audits  
2142 or inspections, including SDV. The purpose of a study group member audit is to  
2143 systematically and independently examine all study-related activities and documents to  
2144 determine whether these activities were conducted, and data were recorded, analysed, and  
2145 accurately reported according to the CSP, Good Clinical Practice (GCP), and any applicable  
2146 regulatory requirements. The investigator should contact the Principal investigator  
2147 immediately if contacted by a regulatory agency about an inspection at his or her centre.

2148

2149 **7.3 Training of staff**

2150 The Principal Investigator will maintain a record of all individuals involved in the study  
2151 (medical, nursing and other staff). He will ensure that appropriate training relevant to the  
2152 study is given to all of these staff, and that any new information of relevance to the  
2153 performance of this study is forwarded to the staff involved.

2154 To ensure consistency throughout the study, all site personnel administering rating scales and  
2155 assessments will receive training in conducting these assessments. Certification on training  
2156 will be required for Europ-ASI only. There will be training and information on all study  
2157 related processes at the start meeting and at local initiation and monitoring meetings. The  
2158 study group will supply more detailed instructions to site personnel as necessary before and  
2159 during the study. To reduce scoring variability, it is recommended that the same rater conduct  
2160 all assessments for a given patient for a specific scale.

2161 Information about training and certification of study personnel on assessments is given in the  
2162 sections describing these assessments, see Sections 4.3 and 4.6.

2163 Before the first patient is entered into the study, the investigational staff will have an  
2164 opportunity to discuss the procedures associated with the collection of blood samples and  
2165 prospective and registry data with members of the study group. The ethical considerations and  
2166 the importance of the informed consent process will be made clear. The requirements for the  
2167 collections of the patients' samples will also be made clear.

2168 **7.4 Changes to the protocol**

2169 If it is necessary for the CSP to be amended, the amendment or a new version of the CSP  
2170 (Amended CSP) must be reapproved by the REC and the Norwegian Medicines Agency if  
2171 major changes to study design (e.g. new medications, different comparison groups) have been  
2172 made compared to the originally approved protocol version. Minor revisions (e.g.  
2173 administrative, re-structuring of existing content) do not require re-approval. Local  
2174 requirements must be followed.

2175 The principle investigator will distribute amendments and Amended CSP, if applicable, to  
2176 each Investigator(s), who in turn is responsible for the distribution of these documents to the

2177 staff at his or her centre. The distribution of these documents to the regulatory authority will  
2178 be handled according to local practice.

## 2179 **7.5 Study agreements**

2180 The Investigator(s) at each centre must comply with all the terms, conditions, and obligations  
2181 of the CSA for this study. In the event of any inconsistency between this CSP and the CSA,  
2182 the CSP shall prevail.

## 2183 **7.6 Study timetable and end of study**

2184 Before a patient's enrolment in the study and any study-related procedures are undertaken the  
2185 following should be fulfilled:

- 2186 • A signed CSP and other agreements between the Principal Investigator and the  
2187 study Site.
- 2188 • An approval of the study by the Regional Ethical Committee (REC)
- 2189 • An approval of the study by the regulatory authority.

2190 The study will start as soon as all pre-study activities are completed and the regulatory  
2191 authorities and Ethical Committee have approved the CSP. Planned study start is August  
2192 2012. Recruitment is expected to last for 2 years or until all patients are included. Recruitment  
2193 will be competitive between centres. If a study sites does not manage to recruit the agreed  
2194 number of patients within the given timeline, the Principle Investigator may decide to close  
2195 the site. Estimated date of the last patient completing is September 2015. End of study is  
2196 defined as Database Lock, (estimated as September 2015) which is the time point after which  
2197 no patient will be exposed to study related activities.

## 2198 **8. ETHICS**

### 2199 **8.1 Ethics review**

2200 The PI will provide IECs and Investigators with safety updates/reports according to local  
2201 requirements.

2202 The final CSP, including the final version of the ICF, must be approved or given a favourable  
2203 opinion in writing by the REC as appropriate.

2204 The Principal Investigator is responsible for informing the REC of any amendment to the CSP  
2205 in accordance with local requirements.

2206 Notifications of serious and unexpected adverse drug reactions will be provided to regulatory  
2207 authority according to regulations and guidelines.

2208

2209 **8.2 Ethical conduct of the study**

2210 The study will be performed in accordance with ethical principles that have their origin in the  
2211 Declaration of Helsinki and are consistent with ICH-GCP and the applicable regulatory  
2212 requirements.

2213 **8.3 Informed consent**

2214 The Investigator(s) at each centre will ensure that the patient is given full and adequate oral  
2215 and written information about the nature, purpose, possible risk and benefit of the study.  
2216 Patients must also be notified that they are free to discontinue from the study at any time. The  
2217 patient should be given the opportunity to ask questions and allowed time to consider the  
2218 information provided.

2219 The patient's signed and dated informed consent must be obtained before conducting any  
2220 procedure specifically for the study, including the following:

- 2221 • Withholding or discontinuation of treatment
- 2222 • Collection of blood and urine samples
- 2223 • Completion of rating scales and/or questionnaires
- 2224 • Physical examination

2225 The Investigator(s) must store the original, signed ICF. A copy of the signed ICF should be  
2226 given to the patient.

2227 **8.4 Patient data protection and storage**

2228 The Master ICF will incorporate (or, in some cases, be accompanied by a separate document  
2229 incorporating) wording that complies with relevant data protection and privacy legislation.  
2230 Pursuant to this wording, patients will authorise the collection, use and disclosure of their  
2231 study data by the Investigator and by those persons who need that information for the  
2232 purposes of the study.

2233 The Master ICF will explain that study data will be stored in a computer database, maintaining  
2234 confidentiality in accordance with national data legislation. All data computer processed by  
2235 the study group will be identified by randomisation code / study code.

2236 The Master ICF will also explain that for data verification purposes, a regulatory authority, the  
2237 REC or Norwegian Medicines Agency may require direct access to parts of the clinical  
2238 records relevant to the study, including patients' medical history.

2239 All documents of significance for the trial will be kept and stored for at least 15 years  
2240 following database lock by the sponsor in accordance with the national regulation of 30.  
2241 October 2009. Other regulations may warrant storage beyond 15 years.

2242 Clinical patient records and CRF are stored locally on site. Following database lock, local data  
2243 will be stored in accordance with prevailing local and National guidelines.

2244

## 2245 **9. SAFETY ASSESSMENTS**

### 2246 **9.1 Definitions**

2247 The definitions of adverse events (AEs), serious adverse events (SAEs) and other significant  
2248 adverse events (OAEs) are given below. It is of the utmost importance that all staff involved  
2249 in the study is familiar with the content of this section. The Principal Investigator is  
2250 responsible for ensuring that this is accomplished.

#### 2251 **9.1.1 Adverse Event (AE)**

2252 An AE is the development of an undesirable medical condition or the deterioration of a pre-  
2253 existing medical condition following or during exposure to a pharmaceutical product, whether  
2254 or not considered causally related to the product. An undesirable medical condition can be  
2255 symptoms (e.g., nausea, chest pain), signs (e.g., tachycardia, enlarged liver) or the abnormal  
2256 results of an investigation (e.g., laboratory findings). In clinical studies, an AE can include an  
2257 undesirable medical condition occurring at any time, including run-in or washout periods,  
2258 even if no study treatment has been administered.

#### 2259 **9.1.2 Serious Adverse Event (SAE)**

2260 An SAE is an AE occurring during any study phase (i.e., run-in, treatment, wash-out, follow-  
2261 up), and at any dose of the products used in this study that fulfils one or more of the following  
2262 criteria:

- 2263 – Results in death
- 2264 – Is immediately life-threatening
- 2265 – Requires in-patient hospitalisation or prolongation of existing hospitalisation
- 2266 – Results in persistent or significant disability or incapacity
- 2267 – Is a congenital abnormality or birth defect
- 2268 – Is an important medical event that may jeopardise the patient or may require  
2269 medical intervention to prevent one of the above listed outcomes

2270 The causality of SAE (i.e. their relationship to study treatment) will be assessed by the  
2271 investigator(s), who in completing the relevant CRF must answer “yes” or “no” to the  
2272 question “Do you consider that there is a reasonable possibility that the event may have been  
2273 caused by XR-NTX?” For further guidance on the definition of a SAE and a guide to the

2274 interpretation of the causality question, see Appendix B. Note that SAEs that could be  
2275 associated with any study procedure should also be reported. For such events the causal  
2276 relationship is implied as “yes”.

### 2277 **9.1.3 Suspected Unexpected Serious Adverse Reaction (SUSAR)**

2278 Adverse Reaction: all untoward and unintended responses to an investigational medicinal  
2279 product related to any dose administered. In this study, the investigational medicinal product  
2280 is XR-NTX which is administered in one dosage only (380 mg) every 4 weeks.

2281  
2282 Unexpected Adverse Reaction: an adverse reaction, the nature or severity of which is not  
2283 consistent with the applicable product information (SPC or IB) for the investigational  
2284 medicinal product (XR-NTX).

2285  
2286 Suspected Unexpected Serious Adverse Reaction (SUSAR) is an Unexpected Adverse  
2287 Reaction that fulfills any of the below criteria:

- 2288
- 2289 • Results in death
- 2290 • Is immediately life-threatening
- 2291 • Requires in-patient hospitalization or prolongation of existing hospitalization
- 2292 • Results in persistent or significant disability or incapacity
- 2293 • Causes a congenital abnormality or birth defect in pregnant patients
- 2294 • Is an important medical event that may jeopardize the subject or may require medical  
2295 intervention to prevent one of the outcomes listed above.

## 2296 **9.2 Recording of adverse events**

2297 The AEs recorded in this study will be classified using the Common Terminology Criteria for  
2298 Adverse Events (CTCAE) Version 4.0. Only AEs that appear or worsen following  
2299 administration of the first dose of study medication until the end of the RCT period (12  
2300 Weeks/85 days) and are rated level 2 (medical intervention indicated) or higher on the  
2301 CTCAE will be registered.

2302 AEs will be reported on the appropriate sections of the CRF, whether or not considered related  
2303 to the investigational product. This will include AEs spontaneously reported by the patient  
2304 and/or observed by the investigator(s) or centre staff. At each visit, the patient will be asked  
2305 non-specific and addiction-related questions on somatic health status based on the Europ-ASI  
2306 section C. Patients will also be instructed to volunteer AEs noted at any time during the study.  
2307 Post study AEs will not be actively sought, but must be reported on the appropriate sections of  
2308 the CRF when the investigator is made aware of them.

2309 For each AE the following must be recorded on the CRF:



- 2310 – Description of the event
- 2311 – Start and stop date
- 2312 – Whether it constitutes a SAE or not
- 2313 – Action taken with regard to the study drugs
- 2314 – If the AE caused the patient to discontinue the study
- 2315 – Causality (relationship to investigational product)
- 2316 – Outcome

### 2317 **9.2.1 Expected Adverse Events**

2318 The following events are commonly occurring in the opioid dependent population and will  
2319 only be registered as AEs related to a patient's participation in the trial following careful  
2320 assessment by the investigator, delegate and/or PI of their relationship to the investigational  
2321 medicinal product in particular or study participation in general: Dependence, abuse or use of  
2322 any illicit substance or alcohol; tissue damage, infections or related problems resulting from  
2323 the patients' self-injection of illicit drugs, e.g. infection with hepatitis, HIV, or tissue  
2324 infections surrounding the injection site; intoxication on any substance or withdrawal from  
2325 such; acute medical or psychiatric events/disorders resulting from intoxication and/or  
2326 withdrawal or interaction with persons suffering such effects: e.g. head or other trauma due to  
2327 DUI, trauma or tissue damage due to violent interaction with law enforcement and/or  
2328 intoxicated persons, acute psychiatric ward admission due to stimulant- or withdrawal-induced  
2329 psychoses, manic behaviour due to intoxication, withdrawal-related depressive symptoms,  
2330 etc.; infections, trauma or tissue damage due to long-term use of substances, e.g. symptoms of  
2331 starvation or malnourishment due to substance use, STDs due to prostitution or rape or  
2332 psychiatric disease, liver damage or Korsakoff's psychosis due to long-term heavy alcohol  
2333 use, abnormal weight loss or hair loss due to neglect of food intake, and any other condition  
2334 overrepresented in the drug using demographic as determined by the investigator.

2335 The investigator determines if the patients' symptoms are coherent with any of the above  
2336 causes or should be registered as a study-related AE. Cases of doubt should be resolved by  
2337 discussion with the site investigator, National Coordinating Investigator (PI) or delegate.  
2338 Symptoms that fail to register as a study-related AE may still be registered as study outcomes  
2339 and should be treated according to standard medical practice. Death due to substance overdose  
2340 (OD) shall be registered as an SAE and reported to the regulatory authorities via the PI in  
2341 accordance with current regulatory guidelines.

2342 A full list of the AEs that are expected based on previous experience with the study drug can  
2343 be found in Appendix B. In summary, common AEs are injection site reactions like buttock  
2344 pain, while swelling, hardness, blisters, redness, abscesses, and tissue death surrounding the  
2345 injection site are less common. AEs likely attributable to the naltrexone component in XR-

2346 NTX include nausea, vomiting, muscle cramps, dizziness, sedation, decreased appetite, and an  
2347 allergic form of pneumonia. Hepatic enzyme abnormalities have sometimes been observed  
2348 when extreme doses of naltrexone have been used or the patient's hepatic health is severely  
2349 reduced compared to normal levels.

### 2350 **9.2.2 Diagnosis**

2351 If a diagnosis of the patient's condition has been made, then the diagnosis should be recorded  
2352 as the SAE or the AE if it warrants medical intervention (see Section 9.2). In instances of  
2353 well-recognised symptoms, they can be recorded as the commonly used diagnosis (e.g., fever,  
2354 runny nose, and cough can be recorded as "flu"). However, if a diagnosis of the patient's  
2355 condition has not been made, or if the individual symptoms are not well recognised, then the  
2356 individual symptoms should be recorded separately.

### 2357 **9.2.3 Causality**

2358 A causality assessment must be recorded for all AEs. The CRF asks the question, "In your  
2359 medical judgement, is there a reasonable possibility that the event may have been caused by  
2360 the investigational product XR-NTX?" If there is valid reason, once sources of common AEs  
2361 seem unlikely (see Section 9.2.1) for suspecting a possible cause-and-effect relationship  
2362 between the investigational product and the occurrence of the AE, then this should be  
2363 answered "yes". Otherwise, if no valid reason exists for suggesting a possible relationship,  
2364 then this should be answered "no". If more than one AE is identified, a causality assessment  
2365 must be made for each AE. For further guidance, see Appendix B.

### 2366 **9.2.4 Abnormal laboratory tests/vital signs**

2367 Individual CSP mandated laboratory and other safety-related test results should not be  
2368 recorded as AEs unless they fulfil the criteria for a SAE or lead to discontinuation of treatment  
2369 with study medication, see Section 3.3.6. These test results will be evaluated in the overall  
2370 safety analysis. However, if an abnormal laboratory or other safety-related test result is  
2371 associated with clinical signs or symptoms, the sign or symptom should be recorded as an AE  
2372 while the associated test result is recorded in the appropriate CRF section.

### 2373 **9.2.5 Rating scales/patient-reported outcomes**

2374 Signs and symptoms revealed and recorded during the rating of any of the scales and  
2375 inventories used in the study should not be reported as AEs, unless they fulfil a criterion for a  
2376 SAE or lead to discontinuation of study treatment, see Section 3.3.6. An evaluation of the  
2377 findings from the rating scales will be performed in the overall analysis.

2378 However, if information about an AE on any PRO instrument is elicited, this may be recorded  
2379 on the AE - CRF page following investigations as described in Section 9.2 of this CSP. If  
2380 such an AE fulfils the definition of a SAE, it should be reported as described in Section 9.3.

2381 **9.2.6 Adverse event of Special Interest – substance-related overdose**

2382 All AEs relating to overdose from alcohol and/or illicit drugs will be carefully monitored.  
2383 These include fatal overdose, non-fatal overdose as reported on the Europ-ASI, events of  
2384 overdose-related suicide attempts.

2385 **9.2.7 Follow-up of ongoing adverse events**

2386 All AEs and SAEs, including those that are ongoing at the end of the study or at  
2387 discontinuation, will be followed up, recorded and treated (if possible) until resolution or until  
2388 the Investigator decides that no further follow-up is necessary. The requirement to follow-up  
2389 is not intended to delay database lock or production of the CSR. Both these activities should  
2390 proceed as planned with ongoing AEs if necessary.

2391 **9.2.8 Overdose of study medication**

2392 For the purposes of this study, an overdose is defined as a dose exceeding 24 mg  
2393 buprenorphine-naloxone per day or XR-NTX at 3-5 times normal dosage per month.

2394 Should an overdose (accidental or deliberate) occur, it must be reported in accordance with the  
2395 procedures described in Section 9.3 regardless of whether the overdose was associated with  
2396 any symptom or not. All symptoms associated with the overdose should be reported as AEs  
2397 provided they fulfil the criteria for AEs as described in this section.

2398

2399 **9.3 Reporting of serious adverse events (SAE)**

2400 Investigators and other site personnel must inform the principal investigator of any SAE that  
2401 occurs in the course of the study **within 48 hours** (no later than the end of the next business  
2402 day) of when he or she becomes aware of it.

2403 SAE information will be entered as a mail to the principal investigator and also reported to  
2404 investigators in charge at the other study sites. The investigator is responsible for completing  
2405 the CRF as soon as possible, and must also report follow-up information on SAEs.

2406 If a non-serious AE becomes serious, this and other relevant follow-up information must also  
2407 be provided to the principal investigator **within 48 hours** as described above.

2408 National Coordinating Investigator (PI) shall immediately, and at the latest seven days after  
2409 learning of an unexpected and serious adverse reaction (SUSAR) that is fatal or life-  
2410 threatening, send a report to the authorities in all the EEA countries concerned. Thereafter,  
2411 relevant information about the further course of events shall be given within eight days.  
2412 SUSARs are reported by the National Coordinating Investigator (PI) submitting a copy of the  
2413 CIOMS form attached in Appendix D of this CSP.

2414 National Coordinating Investigator (PI) shall immediately, and at the latest 15 days after  
2415 learning of an unexpected and serious adverse reaction (SUSAR) that is not fatal or life-  
2416 threatening, send a report to the authorities in all the EEA countries concerned.

2417 Sponsor shall inform all investigators of the investigational medicinal product in question of  
2418 suspected unexpected serious adverse reactions (SUSARs).

2419 The manufacturer of the study drug with which the participant was treated will also be notified  
2420 by the Principal Investigator of the SAE and any contact with relevant regulatory authorities.

2421 SAEs notifications to the manufacturer of VIVITROL © (Alkermes) should be submitted to  
2422 the Dr. Safety fax line at +1 (617) 494-5202. SAEs that are considered SUSARs within the  
2423 VIVITROL© group only should be submitted on a per case basis to Alkermes at the time  
2424 CIOMS forms are submitted to the Norwegian Authorities. SAEs within the VIVITROL©  
2425 group only that do not meet the criteria for expedited reporting can be submitted either on a  
2426 per case basis and will be included as part of a quarterly progress report to Alkermes.

### 2427 **9.3.1 Outcome Death**

2428 If the reason for discontinuation from the study is death, the event causing death should be  
2429 reported as a SAE. Mortality is greatly elevated among opioid users compared to the normal  
2430 population due to increased exposure to several potentially lethal practices. Increased  
2431 mortality relative to the normal population is therefore expected in the study sample, and  
2432 careful assessment of the available evidence by the National Coordinating Investigator (PI) is  
2433 necessary in order to accurately determine the cause of death in each individual case. Death  
2434 itself should be reported as the outcome on the appropriate CRF. Where the death is due to a  
2435 combination of conditions, the investigator must decide on the primary cause of death and  
2436 assign discontinuation to the appropriate category. The appropriate sections of the CRF  
2437 should be completed for all conditions and reported to the principal investigator. The report  
2438 should contain information regarding the co-involvement of disease, if appropriate, and  
2439 incorporate information regarding the primary and secondary causes of death.

2440

## 2441 **9.4 Procedures in case of emergency, overdose or pregnancy**

### 2442 **9.4.1 Emergency contact procedure**

2443 In the case of a medical emergency, any member of the study team may be contacted. Their  
2444 contact details are detailed in **Clinical Study Protocol Supplement 1: Study Team Contacts**  
2445 in the Event of Emergency Situations, Overdose or Pregnancy. This supplement will be  
2446 inserted to face this page in all printed copies of the protocol.

2447

### 2448 **9.4.2 Procedures in case of medical emergency**

2449 The Principal Investigator(s) is responsible for ensuring that procedures and expertise are  
2450 available to handle medical emergencies during the study. **A medical emergency usually**  
2451 **constitutes an SAE and should be reported as such, see Section 9.3.**

2452 **9.4.3 Procedures in case of overdose**

2453 For the purposes of this study, an overdose is defined as a dose exceeding the number of  
2454 tablets specified for each day. Overdose should be reported and recorded as follows:

- 2455 • Use of study medication in doses in excess of that specified in the CSP should not  
2456 be recorded in the CRFs as an AE of 'Overdose' unless there are associated  
2457 symptoms or signs
- 2458 • An overdose without associated symptoms should not be recorded as an AE in the  
2459 CRFs.
- 2460 • An overdose with associated non-serious AEs should be recorded as the AE  
2461 diagnosis/symptoms on the relevant AE forms in the CRFs.
- 2462 • An overdose with associated SAEs should be recorded as the SAE  
2463 diagnosis/symptoms on the relevant AE forms in the CRFs. If symptoms meeting  
2464 the criteria for a SAE have occurred in association with the overdose, the case must  
2465 be reported as a SAE, see Section 6.4.6.2.
- 2466 • In all instances, the overdose substance must be stated and an assessment whether  
2467 the overdose was accidental or intentional should be recorded. If the overdose was  
2468 a suicide attempt, this fact should be clearly stated, see Section 9.6.

2469 **9.5 Procedures in case of pregnancy**

2470 Should pregnancy occur during the study, treatment with investigational product should be  
2471 stopped and the patient should be discontinued from the study.

2472 Pregnancy itself is not regarded as an AE unless there is a suspicion that the investigational  
2473 product under study may have interfered with the effectiveness of a contraceptive medication.  
2474 However, the outcome of all pregnancies (spontaneous miscarriage, elective termination,  
2475 normal birth or congenital abnormality) must be followed up and documented even if the  
2476 patient was discontinued from the study.

2477 All reports of congenital abnormalities/birth defects are SAEs. Spontaneous miscarriages  
2478 should also be reported and handled as SAEs. Elective abortions without complications  
2479 should not be handled as AEs. All outcomes of pregnancy must be reported in the CRF.

2480 Any complications during pregnancy should be recorded as AEs and may constitute SAE if  
2481 they fulfil the specified criteria for a SAE.

2482 **9.6 Procedures in case of suicide attempt or suicide**

2483 Suicide or suicide attempt, irrespective of method, but in connection with the use of  
2484 investigational product, should be reported as an AE or SAE in accordance with the definition  
2485 provided in Section 4.7. The event should be identified as suicide or suicide attempt, and the  
2486 method of the suicide or the suicide attempt, should be provided.

Clinical Study Protocol  
Drug XR-NTX  
Study Code: NTX-204725-1  
Edition Number 3C  
Date: June 12, 2012

2487 All events of suicidality will be recorded in the CRF. These include events of suicide attempts,  
2488 suicide ideation, completed suicides, and suicidal behaviour. The last category includes  
2489 behavioural AEs or SAEs in which the investigator cannot rule out underlying suicidal  
2490 thinking, e.g., a motor vehicle accident, or behaving in a dangerous or unsafe way, and other  
2491 self-injurious behaviours.

2492 Any patient who, based on the investigator's judgement, poses an imminent risk of suicide  
2493 should be discontinued from the study, see Section 3.3.6.1 and 3.3.6.2. All efforts should be  
2494 taken to minimise the risk of suicide.

2495

2496 **10. REFERENCES**

2497

- 2498 1. Leshner AI. Addiction is a brain disease, and it matters. *Science*. 1997;278(5335):45-  
2499 7.
- 2500 2. Emcdda. The state of the drugs problem in Europe. Lisbon: European Monitoring  
2501 Centre for Drugs and Drug Addiction2008.
- 2502 3. Unodc. World Drug Report. Vienna: United Nations Office on Drugs and Crime2008.
- 2503 4. Who. Guidelines for the Psychosocially Assisted Pharmacological Treatment of  
2504 Opioid Dependence 2009.
- 2505 5. Gowing L, Farrell M, Ali R, White JM. Alpha2-adrenergic agonists for the  
2506 management of opioid withdrawal. *Cochrane Database SystRev*. 2009(2):CD002024.
- 2507 6. Gowing L, Ali R, White JM. Buprenorphine for the management of opioid withdrawal.  
2508 GowingLinda, AliRobert, WhiteJasonMBuprenorphineforthe managementof  
2509 opioidwithdrawalCochraneDatabaseof SystematicReviews: Reviews2009Issue3 JohnWiley&  
2510 Sons, LtdChichester, UK DOI: 101002/14651858CD002025pub4. 2009.
- 2511 7. Unnithan S, Gossop M, Strang J. Factors associated with relapse among opiate addicts  
2512 in an out-patient detoxification programme. *BrJ Psychiatry*. 1992;161:654-7.
- 2513 8. Chutuape MA, Jasinski DR, Fingerhood MI, Stitzer ML. One-, three-, and six-month  
2514 outcomes after brief inpatient opioid detoxification. *American Journal of Drug and Alcohol  
2515 Abuse*. 2001;27(1):19-44.
- 2516 9. Strang J, McCambridge J, Best D, Beswick T, Bearn J, Rees S, et al. Loss of tolerance  
2517 and overdose mortality after inpatient opiate detoxification: follow up study. *BMJ*.  
2518 2003;326(7396):959-60.
- 2519 10. Simpson DD, Sells SB. *Opioid Addiction and Treatment*. Malabar, FL: Robert E.  
2520 Krieger Publishing Co.; 1990.
- 2521 11. Gossop M, Marsden J, Stewart D, Kidd T. The National Treatment Outcome Research  
2522 Study (NTORS): 4-5 year follow-up results. *Addiction*. 2003;98(3):291-303.
- 2523 12. Flynn PM, Joe GW, Broome KM, Simpson DD, Brown BS. Recovery from opioid  
2524 addiction in DATOS. *J Subst Abuse Treat*. 2003 Oct;25(3):177-86.
- 2525 13. Teesson M, Ross J, Darke S, Lynskey M, Ali R, Ritter A, et al. One year outcomes for  
2526 heroin dependence: findings from the Australian Treatment Outcome Study (ATOS). *Drug  
2527 and Alcohol Dependence*. 2006;83(2):174-80.

- 2528 14. Ravndal E, Amundsen EJ. Mortality among drug users after discharge from inpatient  
2529 treatment: An 8-year prospective study. *Drug and Alcohol Dependence*. 2009.
- 2530 15. Ward J, Hall W, Mattick RP. Role of maintenance treatment in opioid dependence.  
2531 *Lancet*. 1999;353(9148):221-6.
- 2532 16. Buster MC, van Brussel GH, van den Brink W. An increase in overdose mortality  
2533 during the first 2 weeks after entering or re-entering methadone treatment in Amsterdam.  
2534 *Addiction*. 2002 Aug;97(8):993-1001.
- 2535 17. Bao YP, Liu ZM, Epstein DH, Du C, Shi J, Lu L. A meta-analysis of retention in  
2536 methadone maintenance by dose and dosing strategy. *Am J Drug Alcohol Abuse*.  
2537 2009;35(1):28-33.
- 2538 18. Faggiano F, Vigna-Taglianti F, Versino E, Lemma P. Methadone maintenance at  
2539 different dosages for opioid dependence. *Cochrane Database Syst Rev*. 2003(3):CD002208.
- 2540 19. Mattick RP, Breen C, Kimber J, Davoli M. Methadone maintenance therapy versus no  
2541 opioid replacement therapy for opioid dependence. *CochraneDatabaseSystRev*.  
2542 2003(2):CD002209.
- 2543 20. Amato L, Davoli M, Perucci A, Ferri M, Faggiano F, Mattick P. An overview of  
2544 systematic reviews of the effectiveness of opiate maintenance therapies: available evidence to  
2545 inform clinical practice and research. *Journal of Substance Abuse Treatment*. 2005;28(4):321-  
2546 9.
- 2547 21. Marsch LA. The efficacy of methadone maintenance interventions in reducing illicit  
2548 opiate use, HIV risk behavior and criminality: a meta-analysis. *Addiction*. 1998;93(4):515-32.
- 2549 22. Caplehorn JR, Dalton MS, Cluff MC, Petrenas AM. Retention in methadone  
2550 maintenance and heroin addicts' risk of death. *Addiction*. 1994 Feb;89(2):203-9.
- 2551 23. Gossop M, Marsden J, Stewart D, Treacy S. Outcomes after methadone maintenance  
2552 and methadone reduction treatments: two-year follow-up results from the National Treatment  
2553 Outcome Research Study. *Drug Alcohol Depend*. 2001 May 1;62(3):255-64.
- 2554 24. Skeie I, Brekke M, Lindbaek M, Waal H. Somatic health among heroin addicts before  
2555 and during opioid maintenance treatment: a retrospective cohort study. *BMC Public Health*.  
2556 2008;8:43.
- 2557 25. Clausen T, Anchersen K, Waal H. Mortality prior to, during and after opioid  
2558 maintenance treatment (OMT): a national prospective cross-registry study. *Drug and Alcohol  
2559 Dependence*. 2008;94(1-3):151-7.
- 2560 26. Magura S, Rosenblum A. Leaving methadone treatment: lessons learned, lessons  
2561 forgotten, lessons ignored. *Mount Sinai Journal of Medicine*. 2001;68(1):62-74.



- 2562 27. Ehret GB, Voide C, Gex-Fabry M, Chabert J, Shah D, Broers B, et al. Drug-induced  
2563 long QT syndrome in injection drug users receiving methadone: high frequency in  
2564 hospitalized patients and risk factors. *Arch Intern Med.* 2006 Jun 26;166(12):1280-7.
- 2565 28. Maremmani I, Pacini M, Cesaroni C, Lovrecic M, Perugi G, Tagliamonte A. QTc  
2566 interval prolongation in patients on long-term methadone maintenance therapy. *Eur Addict*  
2567 *Res.* 2005;11(1):44-9.
- 2568 29. Anchersen K, Clausen T, Gossop M, Hansteen V, Waal H. Prevalence and clinical  
2569 relevance of corrected QT interval prolongation during methadone and buprenorphine  
2570 treatment: a mortality assessment study. *Addiction.* 2009;104(6):993-9.
- 2571 30. Walsh SL, Preston KL, Bigelow GE, Stitzer ML. Acute administration of  
2572 buprenorphine in humans: partial agonist and blockade effects. *JPharmacolExpTher.*  
2573 1995;274(1):361-72.
- 2574 31. Dollery C. *Therapeutic Drugs.* Toronto: Churchill Livingstone; 1999.
- 2575 32. Lewis JW. Buprenorphine. *Drug and Alcohol Dependence.* 1985;14(3-4):363-72.
- 2576 33. Johnson RE, Cone EJ, Henningfield JE, Fudala PJ. Use of buprenorphine in the  
2577 treatment of opiate addiction. I. Physiologic and behavioral effects during a rapid dose  
2578 induction. *Clinical Pharmacology and Therapeutics.* 1989;46(3):335-43.
- 2579 34. Boysen K, Hertel S, Chraemmer-Jorgensen B, Risbo A, Poulsen NJ. Buprenorphine  
2580 antagonism of ventilatory depression following fentanyl anaesthesia. *Acta AnaesthesiolScand.*  
2581 1988;32(6):490-2.
- 2582 35. Kuhlman JJ, Jr., Lalani S, Magluido J, Jr., Levine B, Darwin WD. Human  
2583 pharmacokinetics of intravenous, sublingual, and buccal buprenorphine. *JAnalToxicol.*  
2584 1996;20(6):369-78.
- 2585 36. Cone EJ, Dickerson S, Darwin WD, Fudala PJ, Johnson RE. Elevated drug saliva  
2586 levels suggests a depot-like effect in subjects treated with sublingual buprenorphine. In: Harris  
2587 L, editor.: *The College on the Problems of Drug Dependence*; 1991.
- 2588 37. Ahmadi J, Babae-Beigi M, Alishahi M, Maany I, Hidari T. Twelve-month  
2589 maintenance treatment of opium-dependent patients. *Journal of Substance Abuse Treatment.*  
2590 2004;26(1):363-6.
- 2591 38. Johnson RE, Eissenberg T, Stitzer ML, Strain EC, Liebson IA, Bigelow GE. A placebo  
2592 controlled clinical trial of buprenorphine as a treatment for opioid dependence. *Drug and*  
2593 *Alcohol Dependence.* 1995;40(1):17-25.
- 2594 39. Kakko J, Svanborg KD, Kreek MJ, Heilig M. 1-year retention and social function after  
2595 buprenorphine-assisted relapse prevention treatment for heroin dependence in Sweden: a  
2596 randomised, placebo-controlled trial. *Lancet.* 2003;361(9358):662-8.

- 2597 40. Krook AL, Brors O, Dahlberg J, Grouff K, Magnus P, Roysamb E, et al. A placebo-  
2598 controlled study of high dose buprenorphine in opiate dependents waiting for medication-  
2599 assisted rehabilitation in Oslo, Norway. *Addiction*. 2002;97(5):533-42.
- 2600 41. Ling W, Charuvastra C, Collins JF, Batki S, Brown LS, Jr., Kintaudi P, et al.  
2601 Buprenorphine maintenance treatment of opiate dependence: a multicenter, randomized  
2602 clinical trial. *Addiction*. 1998;93(4):475-86.
- 2603 42. Pani PP, Marenmani I, Pirastu R, Tagliamonte A, Gessa GL. Buprenorphine: a  
2604 controlled clinical trial in the treatment of opioid dependence. *Drug and Alcohol Dependence*.  
2605 2000;60(1):39-50.
- 2606 43. Schottenfeld RS, Chawarski MC, Pakes JR, Pantaloni MV, Carroll KM, Kosten TR.  
2607 Methadone versus buprenorphine with contingency management or performance feedback for  
2608 cocaine and opioid dependence. *American Journal of Psychiatry*. 2005;162(2):340-9.
- 2609 44. Uehlinger C, Deglon J, Livoti S, Petitjean S, Waldvogel D, Ladewig D. Comparison of  
2610 buprenorphine and methadone in the treatment of opioid dependence. Swiss multicentre study.  
2611 *European Addiction Research*. 1998;4 Suppl 1:13-8.
- 2612 45. Ahmadi J. Methadone versus buprenorphine maintenance for the treatment of heroin-  
2613 dependent outpatients. *Journal of Substance Abuse Treatment*. 2003;24(3):217-20.
- 2614 46. Fischer G, Gombas W, Eder H, Jagsch R, Peternell A, Stuhlinger G, et al.  
2615 Buprenorphine versus methadone maintenance for the treatment of opioid dependence.  
2616 *Addiction*. 1999;94(9):1337-47.
- 2617 47. Johnson RE, Jaffe JH, Fudala PJ. A controlled trial of buprenorphine treatment for  
2618 opioid dependence. *JAMA: The Journal of the American Medical Association*.  
2619 1992;267(20):2750-5.
- 2620 48. Kosten TR, Schottenfeld R, Ziedonis D, Falcioni J. Buprenorphine versus methadone  
2621 maintenance for opioid dependence. *Journal of Nervous and Mental Disease*.  
2622 1993;181(6):358-64.
- 2623 49. Ling W, Wesson DR, Charuvastra C, Klett CJ. A controlled trial comparing  
2624 buprenorphine and methadone maintenance in opioid dependence. *Archives of General  
2625 Psychiatry*. 1996;53(5):401-7.
- 2626 50. Mattick RP, Ali R, White JM, O'Brien S, Wolk S, Danz C. Buprenorphine versus  
2627 methadone maintenance therapy: a randomized double-blind trial with 405 opioid-dependent  
2628 patients. *Addiction*. 2003;98(4):441-52.
- 2629 51. Neri S, Bruno CM, Pulvirenti D, Malaguarnera M, Italiano C, Mauceri B, et al.  
2630 Randomized clinical trial to compare the effects of methadone and buprenorphine on the  
2631 immune system in drug abusers. *Psychopharmacology (Berl)*. 2005;179(3):700-4.

- 2632 52. Petitjean S, Stohler R, Deglon JJ, Livoti S, Waldvogel D, Uehlinger C, et al. Double-  
2633 blind randomized trial of buprenorphine and methadone in opiate dependence. *Drug and*  
2634 *Alcohol Dependence*. 2001;62(1):97-104.
- 2635 53. Strain EC, Stitzer ML, Liebson IA, Bigelow GE. Comparison of buprenorphine and  
2636 methadone in the treatment of opioid dependence. *American Journal of Psychiatry*.  
2637 1994;151(7):1025-30.
- 2638 54. Mattick RP, Kimber J, Breen C, Davoli M. Buprenorphine maintenance versus placebo  
2639 or methadone maintenance for opioid dependence (Review). *Cochrane Database of Systematic*  
2640 *Reviews*. 2008(2).
- 2641 55. Fatseas M, Auriacombe M. Why buprenorphine is so successful in treating opiate  
2642 addiction in France. *CurrPsychiatry Rep*. 2007;9(5):358-64.
- 2643 56. Thirion X, Lapierre V, Micallef J, Ronfle E, Masut A, Pradel V, et al. Buprenorphine  
2644 prescription by general practitioners in a French region. *Drug and Alcohol Dependence*.  
2645 2002;65(2):197-204.
- 2646 57. Auriacombe M, Fatseas M, Dubernet J, Daulouede JP, Tignol J. French field  
2647 experience with buprenorphine. *American Journal on Addictions*. 2004;13 Suppl 1:S17-S28.
- 2648 58. Bouchez J, Beauverie P, Touzeau D. Substitution with buprenorphine in methadone-  
2649 and morphine sulfate-dependent patients. Preliminary results. *European Addiction Research*.  
2650 1998;4 Suppl 1:8-12.
- 2651 59. Kayemba-Kay's S, Lacluye JP. Buprenorphine withdrawal syndrome in newborns: a  
2652 report of 13 cases. *Addiction*. 2003;98(11):1599-604.
- 2653 60. Bell J, Byron G, Gibson A, Morris A. A pilot study of buprenorphine-naloxone  
2654 combination tablet (Suboxone) in treatment of opioid dependence. *Drug and Alcohol Review*.  
2655 2004;23(3):311-7.
- 2656 61. Alho H, Sinclair D, Vuori E, Holopainen A. Abuse liability of buprenorphine-  
2657 naloxone tablets in untreated IV drug users. *Drug and Alcohol Dependence*. 2007;88(1):75-8.
- 2658 62. O'Brien CP, Greenstein RA, Mintz J, Woody GE. Clinical experience with naltrexone.  
2659 *American Journal of Drug and Alcohol Abuse*. 1975;2(3-4):365-77.
- 2660 63. Gonzalez JP, Brogden RN. Naltrexone. A review of its pharmacodynamic and  
2661 pharmacokinetic properties and therapeutic efficacy in the management of opioid dependence.  
2662 *Drugs*. 1988;35(3):192-213.
- 2663 64. Kunoe N, Lobmaier P, Vederhus JK, Hjerkin B, Hegstad S, Gossop M, et al.  
2664 Retention in naltrexone implant treatment for opioid dependence. *Drug Alcohol Depend*. 2010  
2665 Sep 1;111(1-2):166-9.

- 2666 65. Narcotic Antagonists: Naltrexone progress report. In: Julius D, Renault P,  
2667 editors.1976.
- 2668 66. Washton AM, Pottash AC, Gold MS. Naltrexone in addicted business executives and  
2669 physicians. *Journal of Clinical Psychiatry*. 1984;45(9 Pt 2):39-41.
- 2670 67. Cornish JW, Metzger D, Woody GE, Wilson D, McLellan AT, Vandergrift B, et al.  
2671 Naltrexone pharmacotherapy for opioid dependent federal probationers. *Journal of Substance*  
2672 *Abuse Treatment*. 1997;14(6):529-34.
- 2673 68. Minozzi S, Amato L, Vecchi S, Davoli M, Kirchmayer U, Verster A. Oral naltrexone  
2674 maintenance treatment for opioid dependence. *Cochrane Database of Systematic Reviews*.  
2675 2006;Issue 1(1).
- 2676 69. Krupitsky EM, Zvartau EE, Masalov DV, Tsoi MV, Burakov AM, Egorova VY, et al.  
2677 Naltrexone for heroin dependence treatment in St. Petersburg, Russia. *Journal of Substance*  
2678 *Abuse Treatment*. 2004;26(4):285-94.
- 2679 70. San L, Pomarol G, Peri JM, Olle JM, Cami J. Follow-up after a six-month  
2680 maintenance period on naltrexone versus placebo in heroin addicts. *BrJ Addict*.  
2681 1991;86(8):983-90.
- 2682 71. Shufman EN, Porat S, Witztum E, Gandacu D, Bar-Hamburger R, Ginath Y. The  
2683 efficacy of naltrexone in preventing reabuse of heroin after detoxification. *Biological*  
2684 *Psychiatry*. 1994;35(12):935-45.
- 2685 72. Ladewig D. [Naltrexone--an effective aid in the psychosocial rehabilitation process of  
2686 former opiate dependent patients]. *TherUmsch*. 1990;47(3):247-50.
- 2687 73. Minozzi S, Amato L, Vecchi S, Davoli M, Kirchmayer U, Verster A. Oral naltrexone  
2688 maintenance treatment for opioid dependence. *Cochrane Database Syst Rev*.  
2689 2011;4:CD001333.
- 2690 74. Willette RE. The development of sustained action preparations of narcotic antagonists.  
2691 *NIDA Research Monograph*. 1978;19:333-9.
- 2692 75. Lobmaier P, Kornor H, Kunoe N, Bjorndal A. Sustained-release naltrexone for opioid  
2693 dependence. *Cochrane Database of Systematic Reviews*. 2008;Issue 2(2).
- 2694 76. Comer SD, Sullivan MA, Yu E, Rothenberg JL, Kleber HD, Kampman K, et al.  
2695 Injectable, sustained-release naltrexone for the treatment of opioid dependence: a randomized,  
2696 placebo-controlled trial. *Archives of General Psychiatry*. 2006;63(2):210-8.
- 2697 77. Krupitsky E, Nunes EV, Ling W, Illeperuma A, Gastfriend DR, Silverman BL.  
2698 Injectable extended-release naltrexone for opioid dependence: a double-blind, placebo-  
2699 controlled, multicentre randomised trial. *Lancet*. 2011 Apr 30;377(9776):1506-13.

Clinical Study Protocol  
Drug XR-NTX  
Study Code: NTX-204725-1  
Edition Number 3C  
Date: June 12, 2012

- 2700 78. Kunoe N, Lobmaier P, Vederhus JK, Hjerkin B, Hegstad S, Gossop M, et al.  
2701 Naltrexone implants after in-patient treatment for opioid dependence: randomised controlled  
2702 trial. *Br J Psychiatry*. 2009;194(6):541-6.
- 2703 79. Hulse GK, Morris N, Arnold-Reed D, Tait RJ. Improving clinical outcomes in treating  
2704 heroin dependence: randomized, controlled trial of oral or implant naltrexone. *Archives of*  
2705 *General Psychiatry*. 2009;66(10):1108-15.
- 2706 80. O'Brien B, Cody C. Analgesia and sedation in the presence of a naltrexone implant: a  
2707 novel pharmacological challenge. *EurJ EmergMed*. 2006;13(5):315-6.
- 2708 81. Sinha R, Easton C. Substance abuse and criminality. *Journal of the American*  
2709 *Academy of Psychiatry and the Law Online*. 1999;27(4):513-26.
- 2710 82. Fazel S, Bains P, Doll H. Substance abuse and dependence in prisoners: a systematic  
2711 review. *Addiction*. 2006;101(2):181-91.
- 2712 83. Emedda. *Drugs and crime: a complex relationship*. Lisbon: European Monitoring  
2713 Centre for Drugs and Drug Addiction2007.
- 2714 84. Mumola CJ, Karberg JC. *Drug Use and Dependence, State and Federal Prisoners,*  
2715 *2004: U.S. Department of Justice Office of Justice Programs Bureau of Justice Statistics*2006.
- 2716 85. Friestad C, Hansen IL. Mental health problems among prison inmates: the effect of  
2717 welfare deficiencies, drug use and self-efficacy. *Journal of Scandinavian Studies in*  
2718 *Criminology and Crime Prevention*. 2005;6:183-96.
- 2719 86. Ødegård E. Drug and alcohol problems among Norwegian inmates. *Nordisk alkohol-*  
2720 *& narkotikatidskrift (NAT)*. 2008;25(3):21-37.
- 2721 87. Plourde C, Brochu S. Drugs in prison: a break in the pathway. *SubstUse Misuse*.  
2722 2002;37(1):47-63.
- 2723 88. Shewan D, Gemmell M, Davies JB. Prison as a Modifier of Drug Using Behaviour.  
2724 *Addiction Research & Theory*. 1994;2(2):203-15.
- 2725 89. Simpler AH, Langhinrichsen-Rohling J. Substance use in prison: How much occurs  
2726 and is it associated with psychopathology? *Addiction Research & Theory*. 2005;13(5):503-11.
- 2727 90. Dolan KA, Shearer J, White B, Zhou J, Kaldor J, Wodak AD. Four-year follow-up of  
2728 imprisoned male heroin users and methadone treatment: mortality, re-incarceration and  
2729 hepatitis C infection. *Addiction*. 2005;100(6):820-8.
- 2730 91. Milloy MJ, Wood E, Small W, Tyndall M, Lai C, Montaner J, et al. Incarceration  
2731 experiences in a cohort of active injection drug users. *Drug Alcohol Rev*. 2008:1-7.

- 2732 92. Lines R, Jurgens R, Betteridge G, Stover H, Laticevschi D, Nelles J. Prison needle  
2733 exchange: lessons from a comprehensive review of international evidence and experience.  
2734 Montreal: Canadian HIV/AIDS Legal Network 2006.
- 2735 93. Kinlock TW, Battjes RJ, Schwartz RP. A novel opioid maintenance program for  
2736 prisoners: preliminary findings. *Journal of Substance Abuse Treatment*. 2002;22(3):141-7.
- 2737 94. Nurco DN, Hanlon TE, Kinlock TW. Recent research on the relationship between  
2738 illicit drug use and crime. *Behavioral Sciences & the Law*. 1991;9(3):221-42.
- 2739 95. Seaman SR, Brettle RP, Gore SM. Mortality from overdose among injecting drug  
2740 users recently released from prison: database linkage study. *British Medical Journal*.  
2741 1998;316(7129):426-8.
- 2742 96. Ødegård E, Amundsen EJ, Kielland KB, Kristoffersen R. The contribution of  
2743 imprisonment and release to fatal overdose among a cohort of Norwegian drug abusers.  
2744 *Addiction Research & Theory*. 2010;18(1):51-8.
- 2745 97. Cropsey KL, Villalobos GC, St Clair CL. Pharmacotherapy treatment in substance-  
2746 dependent correctional populations: a review. *Substance use & misuse*. 2005;40(13-14):1983-  
2747 8.
- 2748 98. Pearson FS, Lipton DS. A Meta-Analytic Review of the Effectiveness of Corrections-  
2749 Based Treatments for Drug Abuse. *The Prison Journal*. 1999;79(4):384-410.
- 2750 99. Perry A, Coulton S, Glanville J, Godfrey C, Lunn J, McDougall C, et al. Interventions  
2751 for drug-using offenders in the courts, secure establishments and the community. *Cochrane*  
2752 *Database of Systematic Reviews*. 2006;Issue 3(3).
- 2753 100. Prendergast ML, Hall EA, Wexler HK, Melnick G, Cao Y. Amity Prison-Based  
2754 Therapeutic Community: 5-Year Outcomes. *The Prison Journal*. 2004;84(1):36-60.
- 2755 101. Johansen TH. Stifinner'n - en rus- og rehabiliteringsavdeling innenfor Oslo fengsel sett  
2756 i lys av Lysgaards kollektivteori og Goffmans begrepsapparat: University of Oslo, Department  
2757 of Sociology and Human Geography; 2005.
- 2758 102. Lobmaier PP, Kunoe N, Gossop M, Katevoll T, Waal H. Naltrexone Implants  
2759 Compared to Methadone: Outcomes Six Months after Prison Release. *European Addiction*  
2760 *Research*. 2010;16(3):139-45.
- 2761 103. Lobmaier PP, Kunoe N, Waal H. Treatment research in prison: Problems and  
2762 solutions in a randomized trial. *Addiction Research & Theory*. 2010;18(1):1-13.
- 2763 104. Shearer J, Wodak AD, Dolan KA. Evaluation of a prison-based naltrexone program.  
2764 *International Journal of Prisoner Health*. 2007;3(3):214-24.

Clinical Study Protocol  
Drug XR-NTX  
Study Code: NTX-204725-1  
Edition Number 3C  
Date: June 12, 2012

- 2765 105. Brahen LS, Henderson RK, Capone T, Kordal N. Naltrexone treatment in a jail work-  
2766 release program. *Journal of Clinical Psychiatry*. 1984;45(9 Pt 2):49-52.
- 2767 106. Chan KY. The Singapore naltrexone community-based project for heroin addicts  
2768 compared with drugfree community-based program: the first cohort. *Journal of Clinical*  
2769 *Forensic Medicine*. 1996;3(2):87-92.
- 2770 107. Binswanger IA, Stern MF, Deyo RA, Heagerty PJ, Cheadle A, Elmore JG, et al.  
2771 Release from prison - a high risk of death for former inmates. *New England Journal of*  
2772 *Medicine*. 2007;356(2):157-65.
- 2773 108. Marzo JN, Rotily M, Meroueh F, Varastet M, Hunault C, Obradovic I, et al.  
2774 Maintenance therapy and 3-year outcome of opioid-dependent prisoners: a prospective study  
2775 in France (2003-06). *Addiction*. 2009;104(7):1233-40.
- 2776 109. Dolan KA, Shearer J, Macdonald M, Mattick RP, Hall W, Wodak AD. A randomised  
2777 controlled trial of methadone maintenance treatment versus wait list control in an Australian  
2778 prison system. *Drug and Alcohol Dependence*. 2003;72(1):59-65.
- 2779 110. Stover H, Hennebel LC, Casselman J. Substitution Treatment in European Prisons - A  
2780 study of policies and practices of substitution treatment in prisons in 18 European countries:  
2781 The European Network of Drug Services in Prison, Cranstoun Drug Services; 2004.
- 2782 111. Larney S, Dolan K. A literature review of international implementation of opioid  
2783 substitution treatment in prisons: equivalence of care? *European Addiction Research*.  
2784 2009;15(2):107-12.
- 2785 112. Stallwitz A, Stover H. The impact of substitution treatment in prisons - a literature  
2786 review. *International Journal of Drug Policy*. 2007;18(6):464-74.
- 2787 113. Undp. Fighting climate change: Human solidarity in a divided world2009.
- 2788 114. Dole VP, Robinson JW, Orraca J, Towns E, Searcy P, Caine E. Methadone treatment  
2789 of randomly selected criminal addicts. *NEnglJ Med*. 1969;280(25):1372-5.
- 2790 115. Tomasino V, Swanson AJ, Nolan J, Shuman HI. The Key Extended Entry Program  
2791 (KEEP): a methadone treatment program for opiate-dependent inmates. *Mount Sinai Journal*  
2792 *of Medicine*. 2001;68(1):14-20.
- 2793 116. Kinlock TW, Gordon MS, Schwartz RP, Fitzgerald TT, O'Grady KE. A randomized  
2794 clinical trial of methadone maintenance for prisoners: results at 12 months postrelease. *J*  
2795 *SubstAbuse Treat*. 2009;37(3):277-85.
- 2796 117. Pavot W, Diener E, Suh E. The Temporal Satisfaction With Life Scale. 1998.
- 2797 118. Bastien CH, Vallieres A, Morin CM. Validation of the Insomnia Severity Index as an  
2798 outcome measure for insomnia research. *Sleep Med*. 2001 Jul;2(4):297-307.

Clinical Study Protocol  
Drug XR-NTX  
Study Code: NTX-204725-1  
Edition Number 3C  
Date: June 12, 2012

- 2799 119. Miller WR, Tonigan JS. Assessing drinkers' motivations for change: The Stages of  
2800 Change Readiness and Treatment Eagerness Scale (SOCRATES). *Psychology of Addictive*  
2801 *Behaviors*. 1996;10(2):81-9.
- 2802 120. Sullivan MA, Vosburg SK, Comer SD. Depot naltrexone: antagonism of the  
2803 reinforcing, subjective, and physiological effects of heroin. *Psychopharmacology (Berl)*.  
2804 2006;189(1):37-46.
- 2805 121. Derogatis LR, Lipman RS, Rickels K, Uhlenhuth EH, Covi L. The Hopkins Symptom  
2806 Checklist (HSCL): a self-report symptom inventory. *BehavSci*. 1974;19(1):1-15.
- 2807 122. McLellan AT, Kushner H, Metzger D, Peters R, Smith I, Grissom G, et al. The Fifth  
2808 Edition of the Addiction Severity Index. *Journal of Substance Abuse Treatment*.  
2809 1992;9(3):199-213.
- 2810 123. Sheehan DV. The Mini-International Neuropsychiatric Interview (M.I.N.I.): the  
2811 development and validation of a structured diagnostic psychiatric interview for DSM-IV and  
2812 ICD-10. *The Journal of clinical psychiatry*. 1998;59 Suppl 20:22-33.
- 2813 124. Sobell LC, Sobell MB. Timeline follow-back: a technique for assessing self-reported  
2814 alcohol consumption. In: Allen JP, Litten RZ, editors. *Measuring Alcohol Consumption:*  
2815 *Psychosocial and Biochemical Methods* Totowa, NJ: Human Press; 1992. p. 41-72.
- 2816
- 2817
- 2818



2819

2820 **AMENDMENT 2 to Clinical Study Protocol for the study 'Optimal Prevention of**  
2821 **Overdose Deaths and Opioid Relapse Following Discharge: A Multi-Center RCT**  
2822 **(EudraCT Code 2011-002858-31) Edition 3C (June 12th 2012).**

2823

2824 Date: Mar 21st 2013.

2825

2826 This amendment introduces two changes to the above mentioned CSP:

- 2827 1) Replaces biological sampling of drug use using saliva / oral fluid samples with  
2828 standard urine drug screen sampling.  
2829 2) Cancels plans to verify patients' naltrexone levels by comparing levels of  
2830 naltrexone and 6-beta naltrexone in oral fluid and in voluntary blood samples.

2831

2832 This deletes or substitutes or changes the following sections of the aforementioned CSP:

2833

2834 **TEXT EDITS – "ORAL FLUID" or "SALIVA" is substituted with "URINE" in:**

2835 **Synopsis**

2836 p. 5: "*Abstinence from illicit opioids assessed by the absence of non-study opioid agonists or*  
2837 *their metabolites in oral fluid and/or patient-reported use of such opioids during the first 12*  
2838 *weeks of the study*" is edited to read

2839 "*Abstinence from illicit opioids assessed by the absence of non-study opioid agonists or their*  
2840 *metabolites in urine drug screens and/or patient-reported use of such opioids during the first*  
2841 *12 weeks of the study.*"

2842 **TABLE OF CONTENTS**

2843 p. 11: "Oral fluid/saliva samples as outcome measures ..... 56"

2844 **TABLE 1a)**

2845 p. 37: "Saliva sample (drugs, NTX)" is edited to "Urine sample (drugs)"

2846 **TABLE 1b)**

2847 p. 38: "Saliva sample (drugs, NTX)" is edited to "Urine sample (drugs)"

2848 **TABLE 1c)**

2849 p. 39: "Saliva sample (drugs, NTX)" is edited to "Urine sample (drugs)"

2850 **2.1. Primary objective**

2851 p. 30: "...assessed by the number of opioid free oral fluid samples during the RCT period.

2852 Variables supporting the primary objective are:

2853 *Between-group differences on opioid abstinence from randomisation to Week*  
2854 *12 as measured by proportion of weekly oral fluid samples positive for non- study opioid*  
2855 *agonists or their metabolites*" is edited to read

2856 "...assessed by the number of opioid free urine drug screen samples during the RCT period.

2857 Variables supporting the primary objective are:

2858 *Between-group differences on opioid abstinence from randomisation to Week*  
2859 *12 as measured by proportion of weekly urine drug screen samples positive for non- study*  
2860 *opioid agonists or their metabolites*"

2861 **2.2 Secondary objective E2**

2862 p. 31: "- the number of oral fluid samples positive for illicit, non-opioid substances or their  
2863 metabolites from Week 1-12 in the study." is edited to read "- the number of urine drug screen

2864 *samples positive for illicit, non-opioid substances or their metabolites from Week 1-12 in the*  
2865 *study.”*

2866 **3.1. Overall study design and flow chart**

2867 p. 34: *“An evaluable patient is defined as a patient who received at least one dose of study*  
2868 *treatment and who has one valid assessment at randomisation and at least one valid oral fluid*  
2869 *or drug use self-report assessment after randomisation.”* is edited to read *“An evaluable*  
2870 *patient is defined as a patient who received at least one dose of study treatment and who has*  
2871 *one valid assessment at randomisation and at least one valid urine drug test or drug use self-*  
2872 *report assessment after randomisation.”*

2873 p. 34: *“(a) Number of weekly oral fluid samples (range 1-12) negative for opioids or their*  
2874 *metabolites..”* is edited to read *“(a) Number of weekly urine drug screen samples (range 1-12)*  
2875 *negative for opioids or their metabolites..”*

2876 **4.1. Primary variable**

2877 p. 50: *“(a) the differences between medication groups in proportion of opioid-free oral fluid*  
2878 *samples from randomization to Week 12”* is edited to read *“(a) the differences between*  
2879 *medication groups in proportion of opioid-free urine drug screen samples from randomization*  
2880 *to Week 12”*

2881 **4.5 Pharmacokinetic measurements and variables**

2882 p. 54: *“saliva samples are used to collect information on recent drug use and naltrexone levels,*  
2883 *ideally with a blood sample (5 mg) taken simultaneously to validate the saliva naltrexone*  
2884 *analysis.”* is edited to read *“urine samples are used to collect information on recent drug*  
2885 *use.”*

2886 **4.6.1 Oral fluid/saliva measures as variables**

2887 p.56-57: *“The outcome from the oral fluid samples will be measured as dichotomous*  
2888 *outcomes, e.g. above or below a clinically significant threshold or the level of detection*  
2889 *(LOD) for each substance. The primary outcome is the number of opioid-free oral fluid*  
2890 *samples during Weeks 1-4, 5-8, 9-12, or 1-12: The number of oral fluid samples negative for*  
2891 *non-study opioids or their metabolites will be subtracted from the total number of samples*  
2892 *(n=12) to yield a proportion of negative samples. Other substances may be analysed as*  
2893 *secondary outcomes in a similar manner. For XR-NTX patients, analyses will include*  
2894 *measurements of levels of naltrexone or metabolites that will be compared to the expected*  
2895 *dosage trajectory and/or blood samples taken concurrently with one or more saliva samples.”*  
2896 is edited to read

2897 *“The outcome from the urine drug screen samples will be measured as dichotomous*  
2898 *outcomes, e.g. above or below a clinically significant threshold or the level of detection*  
2899 *(LOD) for each substance. The primary outcome is the number of opioid-free urine drug*  
2900 *screen samples during Weeks 1-4, 5-8, 9-12, or 1-12: The number of urine drug screen*  
2901 *samples negative for non-study opioids or their metabolites will be subtracted from the total*  
2902 *number of samples (n=12) to yield a proportion of negative samples. Other substances may be*  
2903 *analysed as secondary outcomes in a similar manner.”*

2904 **6.2.1 Primary objective, hypotheses, and outcome variables**

2905 p. 64: *“The primary objective of this study is to evaluate the effectiveness of XR-NTX 380*  
2906 *mg/month versus buprenorphine-naloxone 8-24 mg/day as part of “treatment as usual”,*  
2907 *assessed by the number of opioid free oral fluid samples during the treatment period from*  
2908 *randomization to Week 12.*

2909 *The primary hypotheses are as follows:*

2910 - XR-NTX (380 mg/month) is superior to buprenorphine-naloxone (8-24 mg/day) in the mean  
2911 number of oral fluid samples negative for opioid agonists (other than study drug) or their  
2912 metabolites from randomization until Week 12.” is edited to read

2913 “The primary objective of this study is to evaluate the effectiveness of XR-NTX 380 mg/month  
2914 versus buprenorphine-naloxone 8-24 mg/day as part of “treatment as usual”, assessed by the  
2915 number of opioid free urine drug samples during the treatment period from randomization to  
2916 Week 12.

2917 The primary hypotheses are as follows:

2918 - XR-NTX (380 mg/month) is superior to buprenorphine-naloxone (8-24 mg/day) in the mean  
2919 number of urine drug screen samples negative for opioid agonists (other than study drug) or  
2920 their metabolites from randomization until Week 12.”

#### 2921 **6.2.2. Other secondary objectives: Effectiveness**

2922 p. 65: “XR-NTX (380 mg/month) is superior to buprenorphine-naloxone (8-24 mg/day) in  
2923 reducing non-opioid substance use as measured by the number of oral fluid samples positive  
2924 for illicit, non-opioid substances or their metabolites from Week 1-12 in the study or in self-  
2925 reported use of (or abstinence from) non-opioid substances including cocaine, amphetamines,  
2926 benzodiazepines, alcohol, cannabis, and hallucinogenic drugs (e.g. LSD, MDMA, GHB).” is  
2927 edited to read

2928 “XR-NTX (380 mg/month) is superior to buprenorphine-naloxone (8-24 mg/day) in reducing  
2929 non-opioid substance use as measured by the number of urine drug samples positive for illicit,  
2930 non-opioid substances or their metabolites from Week 1-12 in the study or in self-reported use  
2931 of (or abstinence from) non-opioid substances including cocaine, amphetamines,  
2932 benzodiazepines, alcohol, cannabis, and hallucinogenic drugs (e.g. LSD, MDMA, GHB).”

#### 2933 **6.4.2 Multiplicity**

2934 p. 69: “First the primary outcome variable the number of opioid free saliva samples from  
2935 randomisation to Week 12 will be tested for the naltrexone versus the suboxone group.” is  
2936 edited to read

2937 “First the primary outcome variable the number of opioid free urine samples from  
2938 randomisation to Week 12 will be tested for the naltrexone versus the suboxone group.”

#### 2939 **6.4.3 Primary variable**

2940 p. 69: “An analysis of variance (ANOVA) model for between-groups differences at Week 12 in  
2941 the number of opioid-positive oral fluid samples will be used.” is edited to read “An analysis  
2942 of variance (ANOVA) model for between-groups differences at Week 12 in the number of  
2943 opioid-positive urine drug screen samples will be used.”

#### 2944 **6.4.5.1 Non-opioid substance use**

2945 p. 70: “Response and remission at Week 12, defined from whichever is reported earliest in the  
2946 oral fluid samples and/or TLFB, will be analysed utilising logistic regression or ANOVA  
2947 models.” is edited to read “Response and remission at Week 12, defined from whichever is  
2948 reported earliest in the urine drug samples and/or TLFB, will be analysed utilising logistic  
2949 regression or ANOVA models.”

#### 2950 **6.5 Determination of sample size**

2951 p. 73: “The sample size calculation in this exploratory study was done to model the event that  
2952 XR- NTX demonstrates superior effectiveness over buprenorphine-naloxone with respect to  
2953 the primary outcome variable, differences in opioid-negative oral fluid samples from  
2954 randomisation to Week 12 – a total of 12 oral fluid samples.”

2955 is edited to read “The sample size calculation in this exploratory study was done to model the

2956 *event that XR- NTX demonstrates superior effectiveness over buprenorphine-naloxone with*  
2957 *respect to the primary outcome variable, differences in opioid-negative urine drug samples*  
2958 *from randomisation to Week 12 – a total of 12 urine drug samples.”*

2959

2960

2961

2962 **DELETED – Sentences or sections with "ORAL FLUID" or "SALIVA" or detailing**  
2963 **plans for pharmacokinetics testing or oral fluid sampling:**  
2964 **Synopsis**

2965

2966 p. 6: "- Pharmacokinetic

2967 "Patients with detectable quantities of study drug in oral fluid"

2968

2969 **NOTE: ANY AND ALL TEXT IN THE FOLLOWING SECTIONS IS DELETED AND CONSIDERED**  
2970 **NOT APPLICABLE TO THIS STUDY:**

2971 **4.5. Pharmacokinetic measurements and variables including subsections 4.5 (4.5, 4.5.1, 4.5.1.1, 4.5.1.2,**  
2972 **4.5.1.3, 4.5.2) pp. 54 to pp 55**

2973 **4.8 Volume of blood sampling and handling of biological samples**

2974 p. 62

2975 p. 67: **6.2.2.5 Other secondary objectives: Pharmacokinetics**

2976 p. 72: **6.4.7 Pharmacokinetics**

2977

2978

2979 *Oslo, Aug 26th 2013*

2980

2981 **Protocol amendment NO 4 to 'Optimal Prevention of Overdose Deaths and Opioid**  
2982 **Relapse Following Discharge: A Multi-Center RCT' (EudraCT 2011-002858-31)**

2983

2984 **Changes introduced in this amendment and their rationale:**

2985 A. Patients who wish to switch to XR-NTX onwards will enter a washout-period of  
2986 up to 2 weeks (14 days) following the Week 12 interview. The Washout period is  
2987 introduced in order to prevent data from the buprenorphine-naloxone group  
2988 (arm B) during the 12-Week RCT being biased by influence from detoxification-  
2989 related events and symptoms, e.g. withdrawal symptoms. Patients wishing to  
2990 commence XR-NTX after the 12-Week RCT will be advised to not commence  
2991 detoxification until after the Week 12 visit & interview. Regular Week / Visit  
2992 counts are paused during the Washout period and recommence once XR-NTX is  
2993 administered at the end of detoxification.

2994

2995 B. Patients who experience 'force majeure' type events between randomization and  
2996 administration of study medication are allowed five (n=5) extra working days aka  
2997 'grace days' during which they re-align themselves with this CSP and the  
2998 instructions of site personnel. The grace days are introduced in order to not allow  
2999 force majeure-type events to result in study drop-out during randomization and  
3000 administration of study drug. Force majeure will be defined as any serious  
3001 circumstance study personnel determine to be beyond the patient's control. E.g.  
3002 death of a close relative, natural disasters, intermittent serious illness. Under  
3003 special circumstances determined by the investigator, the number of grace days  
3004 may be extended if deemed necessary to prevent patient drop-out. Week 1 will  
3005 commence once the patient has received the first dose of study drug and has been  
3006 discharged in a regular manner from a controlled environment.

3007  
3008 **Sections of the original CSP (version 3C) changed, modified, or annulled by**  
3009 **amendment 4A:**

3010  
3011  
3012 **Sections of the original CSP (version 3C) changed, modified, or annulled by**  
3013 **amendment 4B:**

3014  
3015

3016

3017 *Oslo, Aug 26th 2013*

3018

3019 **Protocol amendment NO 4 to 'Optimal Prevention of Overdose Deaths and Opioid**  
3020 **Relapse Following Discharge: A Multi-Center RCT' (EudraCT 2011-002858-31)**

3021

3022 **Changes introduced in this amendment and their rationale:**

3023 A. Patients who wish to switch to XR-NTX onwards will enter a washout-period of  
3024 up to 2 weeks (14 days) following the Week 12 interview. The Washout period is  
3025 introduced in order to prevent data from the buprenorphine-naloxone group  
3026 (arm B) during the 12-Week RCT being biased by influence from detoxification-  
3027 related events and symptoms, e.g. withdrawal symptoms. Patients wishing to  
3028 commence XR-NTX after the 12-Week RCT will be advised to not commence  
3029 detoxification until after the Week 12 visit & interview. Regular Week / Visit  
3030 counts are paused during the Washout period and recommence once XR-NTX is  
3031 administered at the end of detoxification.

3032

3033 B. Patients who experience 'force majeure' type events between randomization and  
3034 administration of study medication are allowed five (n=5) extra working days aka  
3035 'grace days' during which they re-align themselves with this CSP and the  
3036 instructions of site personnel. The grace days are introduced in order to not allow  
3037 force majeure-type events to result in study drop-out during randomization and  
3038 administration of study drug. Force majeure will be defined as any serious  
3039 circumstance study personnel determine to be beyond the patient's control. E.g.  
3040 death of a close relative, natural disasters, intermittent serious illness. Under  
3041 special circumstances determined by the investigator, the number of grace days  
3042 may be extended if deemed necessary to prevent patient drop-out. Week 1 will  
3043 commence once the patient has received the first dose of study drug and has been  
3044 discharged in a regular manner from a controlled environment.

3045

3046 **Sections of the original CSP (version 3C) changed, modified, or annulled by**  
3047 **amendment 4A:**

3048

3049

3050 **Sections of the original CSP (version 3C) changed, modified, or annulled by**  
3051 **amendment 4B:**

3052

3053

3054

3055

3056

3057

3058

3059  
3060  
3061  
3062

3063 *Oslo, Feb 10th 2015,*

3064

3065 **Amendment 7 to protocol 'Optimal Prevention of Overdose Deaths and Relapse**  
3066 **following Discharge: A Multi-Center RCT': statistical modifications.**

3067

3068 This amendment introduces modifications to the statistical analysis sections of the  
3069 protocol in order for analyses to remain up-to-date with developments in statistical  
3070 analysis since the original text was written in 2010.

3071

3072 This includes:

- 3073 - Edits and adjustments to analyses to increase concordance with ICH-GCP Topic 9,  
3074 Statistical analyses (EMA, 2006), including non-inferiority hypotheses for  
3075 primary outcomes (as the NTX-SBX study is a comparison with the current  
3076 preferred / standard treatment)
- 3077 - Ensuring compatibility between Section 5: Data Management and the current  
3078 Data Management Plan
- 3079 - Minor edits to urine test outcomes to ensure compliance with Cochrane Drugs &  
3080 Alcohol Group criteria for urine drug test outcomes
- 3081 - Analyses are edited to permit utilization of the statistical advances that have  
3082 taken place in the years since drafting of the original protocol
- 3083 - In statistical software, the open 'R' platform is increasingly popular in statistical  
3084 analysis due to its versatility and community-driven, transparent development  
3085 platform
- 3086 - Corrections to the SOCRATES-8D analyses
- 3087 - The CSP now provides more guidance on when to consult the Statistical Analysis  
3088 Plan (SAP) for further guidance

3089

3090 The analyses of outcomes not mentioned in the original CSP but introduced in  
3091 amendments will be subject to similar changes as those described here and in the  
3092 Statistical Analysis Plan (SAP).

3093

3094 **pp. 7 Summary - 'Statistical Methods'**

3095

3096 The original version reads:

3097

3098 "Descriptive statistics including frequency tables, graphs or scatterplots will be provided for all primary  
3099 outcomes, as well as for the changes from baseline within each treatment and the differences between  
3100 the treatment groups at each visit (Observed Cases (OC) and LOCF as appropriate)."

3101 The revised version shall read:

3102

3103

3104           “Descriptive statistics including frequency tables, graphs or scatterplots will be calculated for all  
3105 primary outcomes, as well as for the changes from baseline within each treatment and the differences  
3106 between the treatment groups at each visit (Observed Cases (OC) and LOCF as appropriate).”  
3107

3108 The original version reads:

3109           “Missing data will be imputed using a Last Observation Carried Forward (LOCF) approach.”  
3110

3111 The revised version shall read:

3112           “Missing data will be imputed using a Last Observation Carried Forward (LOCF) approach or other  
3113 method of imputation or modeling as appropriate.”  
3114

3115 The original version reads:

3116           “  
3117 The primary outcome variable will be analysed using an analysis of variance (ANOVA) or regression  
3118 model as appropriate including treatment, study site and baseline frequency of opioid use as explanatory  
3119 variables. Study site will be treated as a random effect while all other explanatory variables will be  
3120 treated as fixed effects.”

3121 The revised version shall read:

3122           “  
3123 The primary outcome variable will be analysed using a Generalized Linear Mixed Model (GLMM) or  
3124 Generalize Alinear Mixed Model (GAMM) as appropriate. Relevant background variables will be  
3125 controlled for, including treatment, study site and baseline frequency of opioid use. Non-inferiority and  
3126 superiority analyses will be performed.

3127 The original version reads:

3128           “  
3129 Changes from randomisation to every assessment will be analysed similar to the primary objective.”

3130 The revised version shall read:

3131           “  
3132 Changes from randomisation to every assessment will be analysed similar to the primary objective as  
3133 appropriate.”

3134 **pp. 53, Section 4.3.3.2: Derivation or Calculation of outcome variable (Socrates-8D)**

3135 The original version reads:

3136           “  
3137 Socrates 8-D sub-scales include recognition, ambivalence, and taking steps. A Socrates 19- item total  
3138 score will be calculated. Higher scores indicate a higher level of abstinence motivation. The change  
3139 from randomisation will be calculated as the visit score minus the randomisation score. Between-group  
differences or differential developments in Socrates 8D scores will be calculated at any assessment.”

3140 The revised version shall read:

3141           “  
3142 Socrates 8-D sub-scales will be excluded from analyses due to lack of approved scientific validation of  
the Norwegian version.”



3143  
3144

3145 **pp. 63, Section 5: Data Management**

3146 The original version reads:

3147 “When data have been entered and reviewed / edited by a CRO, the site investigator will be notified and  
3148 sign the CRF copy, and data will be locked to prevent further editing.”

3149 The revised version shall read:

3150  
3151 “When data have been entered and reviewed / edited, the investigator will be notified and sign the CRF  
3152 copy, and data will be locked to prevent further editing.”

3153 The original version reads:

3154 “Data will be cleaned on a regular basis by a designated partner. Clean file for the final database will be  
3155 declared by the principal investigator after all data have been set to clean. Prior to declaring clean file,  
3156 all decisions on the evaluability of the data from each patient must have been made and documented.”

3157 The revised version shall read:

3158 “Data will be cleaned on a regular basis. Clean file for the final database will be declared by the  
3159 principal investigator following entry of data from each major study phase, after all data have been set  
3160 to clean. Prior to declaring clean file, all decisions on the evaluability of the data from each patient must  
3161 have been made and documented.”

3162 The original version reads:

3163 “CROs will be used for handling clinical assessments and laboratory data and the results will be sent to  
3164 a designated partner as SPSS or – compatible datasets.”

3165 The revised version shall read:

3166  
3167 “Clinical assessments and laboratory data will be handled in accordance with ICH-GCP, and the data  
3168 file for the initial analysis of RCT phase data (randomization to Week 12) will be sent to a designated  
3169 statistician; this initial data file will mask the names of medication groups with ‘A’ and ‘B’,  
3170 respectively. Data files will be in a format compatible with modern statistical software, e.g R or SPSS.”

3171

3172

3173 **pp. 64-67 Section 6.2. Description of Outcome Variables in relation to Objectives and**  
3174 **Hypotheses**

3175 **pp. 64, Section 6.2.1 Primary objectives, hypotheses and outcome variables**

3176 The original version reads:

3177 "The primary objective of this study is to evaluate the effectiveness of XR-NTX 380 mg/month versus  
3178 buprenorphine-naloxone 8-24 mg/day as part of "treatment as usual", assessed by the number of opioid  
3179 free oral fluid samples during the treatment period from randomization to Week 12.

3180 The primary hypotheses are as follows:

3181 XR-NTX (380 mg/month) is superior to buprenorphine-naloxone (8-24 mg/day) in the mean  
3182 number of oral fluid samples negative for opioid agonists (other than study drug) or their  
3183 metabolites from randomization until Week 12.

3184 . XR-NTX (380 mg/month) is superior to buprenorphine-naloxone (8-24 mg/day) in increasing  
3185 self-reported abstinence from illicit (e.g. non-study) opioids measured as number of days  
3186 abstinent on time-line follow-back

3187 . XR-NTX (380 mg/month) is superior to buprenorphine-naloxone (8-24 mg/day) in retention in  
3188 treatment at Week 12 as measured by comparing the number of patients left and/or calculating  
3189 the proportion of patients retained in each group.

3190 . XR-NTX (380 mg/month) is superior to buprenorphine-naloxone (8-24 mg/day) in reducing  
3191 the number of patients qualifying for an Opioid Dependence Diagnosis on the DSM-IV TR  
3192 (304.00 except the 12-month criteria) as measured using the MINI.

3193 . Any study drug (XR-NTX 380 mg/month or buprenorphine-naloxone 8-24 mg/day) is superior  
3194 to no study drug on preventing mortality as measured by the number of patients deceased from  
3195 randomization until Week 48 according to Norway's National Mortality Registry."

3196 The revised version shall read:

3197 "The primary objective of this study is to evaluate the effectiveness of XR-NTX 380 mg/month versus  
3198 daily buprenorphine-naloxone as part of "treatment as usual", assessed by the number of opioid-free  
3199 urine drug tests (UDTs) during the treatment period from randomization to Week 12.  
3200

3201 The primary hypotheses are as follows:

3202 XR-NTX (380 mg/month) is noninferior or equally effective to daily buprenorphine-naloxone in the  
3203 mean number of urine samples negative for opioid agonists (other than study drug) or their metabolites  
3204 from randomization until Week 12.

3205 . - XR-NTX (380 mg/month) noninferior or equally effective to daily buprenorphine-naloxone  
3206 in increasing self-reported abstinence from illicit (e.g. non-study) opioids measured as number  
3207 of days of use on time-line follow-back

3208 . - XR-NTX (380 mg/month) is equally effective to daily buprenorphine-naloxone in retention  
3209 in treatment at Week 12 as measured by comparing the number of patients left and/or  
3210 calculating the proportion of patients retained in each group or other method of analysis as  
3211 appropriate

3212 . - XR-NTX (380 mg/month) is superior or equally effective to daily buprenorphine-naloxone in  
3213 reducing the number of patients qualifying for an Opioid Dependence Diagnosis on the DSM-  
3214 IV TR (304.00 except the 12-month criteria) as measured using the MINI.

3215  
3216  
3217  
3218  
3219  
3220  
3221

- If mortality proves viable for analysis, any study drug (XR-NTX 380 mg/month or daily buprenorphine-naloxone is superior to no study drug on preventing mortality as measured by the number of patients deceased from randomization until Week 48 according to Norway's National Mortality Registry."

**pp. 65, Section 6.2.2 Secondary objectives, hypotheses and outcome variables**

**pp.64, Section 6.2.2.1 Secondary objective of particular interest**

3222 The original version reads:

3223 "A secondary objective of particular interest is to evaluate if XR-NTX (380 mg/month) reduces heroin  
3224 craving compared to or buprenorphine-naloxone (8-24 mg/day). The secondary hypotheses are as  
3225 follows:

3226 XR-NTX (380 mg/month) is superior to buprenorphine-naloxone (8-24 mg/day) in reducing craving  
3227 for heroin from 107andomization to each monthly assessment until Week 12 as measured on a visual  
3228 analogue scale (VAS)."

3229 The revised version shall read:

3230 "A secondary objective of particular interest is to evaluate if XR-NTX (380 mg/month) reduces heroin  
3231 craving as much as or more than daily medication with buprenorphine-naloxone. The secondary  
3232 hypotheses are as follows:

3233 XR-NTX (380 mg/month) is superior or equivalent to daily buprenorphine-naloxone in reducing  
3234 craving for heroin from randomization to each monthly assessment until Week 12 as measured on a  
3235 visual analogue scale (VAS)."

**3236 pp. 65, Section 6.2.2.2 Other secondary objectives: Effectiveness**

3237 The original version reads:

3238 "Another secondary objective of this study is to evaluate the effectiveness of XR-NTX versus  
3239 buprenorphine-naloxone, or both of these drugs versus no study drugs, within or between clinical and  
3240 criminal justice settings. The secondary hypotheses are as follows:

3241 Any study drug (XR-NTX 380 mg/month or daily buprenorphine-naloxone) will be superior to no study  
3242 drug on:

- 3243 - Morbidity at 48 Weeks post randomization/inclusion as measured by data from the Norwegian  
3244 Patient's Registry.  
3245  
3246 - Criminal re-offending as measured by the number of offences registered at Week 48 in  
3247 Norway's National Criminal Offense Registry and/or self-report.  
3248  
3249 - XR-NTX (380 mg/month) is superior or equal to buprenorphine-naloxone in increasing Quality  
3250 of Life from randomization until Week 12 as measured using the Temporal Satisfaction With  
3251 Life Scale.  
3252  
3253 - XR-NTX (380 mg/month) is superior to buprenorphine-naloxone (8-24 mg/day) in reducing  
3254 non-opioid substance use as measured by the number of oral fluid samples positive for illicit,  
3255 non-opioid substances or their metabolites from Week 1-12 in the study or in self-reported use  
3256 of (or abstinence from) non-opioid substances including cocaine, amphetamines,

3257

- 3258 - benzodiazepines, alcohol, cannabis, and hallucinogenic drugs (e.g. LSD, MDMA, GHB).  
3259  
3260 - XR-NTX (380 mg/month) is superior to buprenorphine-naloxone (8-24 mg/day) in reducing  
3261 drug-related needle use as measured by the number of days needle use reported from  
3262 randomization to Week 12 on time-line follow-back.  
3263  
3264 - XR-NTX (380 mg/month) is superior to buprenorphine-naloxone (8-24 mg/day) in reducing  
3265 income from illicit sales of drugs as assessed by the change from randomization to Week 12 in  
3266 self-reported days with such income and/or the total amount of income from these sources in  
3267 Norwegian Kroner (NKR; 10 NKR = approximately 1,7 US \$). The Europ-ASI will be used for  
3268 this outcome.  
3269 - XR-NTX (380 mg/month) is superior to buprenorphine-naloxone (8-24 mg/day) in reducing  
3270 frequency of injecting drug use as assessed by the change from randomization to Week 12 in  
3271 self-reported days with such use and/or the total use of needles in days during each month on  
3272 the Europ-ASI.  
3273 - XR-NTX (380 mg/month) is superior to buprenorphine-naloxone (8-24 mg/day) in reducing  
3274 frequency blood-borne disease risk behaviours as assessed by the change from  
3275 randomization to Week 12 in self-reported needle use habits for each month on the Europ-  
3276 ASI.

3277 A secondary objective of this study is to evaluate if XR-NTX in the clinical and/or criminal justice  
3278 settings affects motivation for abstinence compared to buprenorphine-naloxone and/or non-randomized  
3279 controls by assessing the change from randomization to Week 12 in self-reported abstinence  
3280 motivation on the total or subscale levels of the Stages of Change Readiness and Treatment Eagerness  
3281 Scale Drugs (SOCRATES 8D).

3282 The secondary hypotheses are:

- 3283 - XR-NTX (380 mg/month) is superior to buprenorphine-naloxone (8-24 mg/day) in increasing  
3284 motivation for abstinence at Week 12 as measured by Total score on the SOCRATES 8D.  
3285 - XR-NTX (380 mg/month) is superior to buprenorphine-naloxone (8-24 mg/day) in increasing  
3286 recognition of addiction problems at Week 12 as measured by increased scores on the  
3287 recognition subscale on the SOCRATES 8D.”  
3288  
3289 - XR-NTX (380 mg/month) is superior to buprenorphine-naloxone (8-24 mg/day) in increasing  
3290 the reported effort towards abstinence at Week 12 as measured by the Taking Steps subscale on  
3291 the SOCRATES 8D.  
3292  
3293 - XR-NTX (380 mg/month) is superior to buprenorphine-naloxone (8-24 mg/day) in increasing  
3294 motivation for abstinence at Week 12 as measured by a reduction on the ambivalence subscale  
3295 of the SOCRATES 8D.”

3296 The revised version shall read:

3297 “The secondary objective of this study to evaluate the effectiveness of XR-NTX versus buprenorphine-  
3298 naloxone, or both of these drugs versus no study drugs, within or between clinical and criminal justice  
3299 settings, has been deleted from the protocol due to too low recruitment from criminal justice settings  
3300 and a too low number of participants in the no-study drug group. Only comparisons between XR-NTX  
3301 and buprenorphine-naloxone will be performed.

3302 XR-NTX (380 mg/month) is superior or equivalent to daily buprenorphine-naloxone in increasing  
3303 or stabilizing Quality of Life from randomization until Week 12 as measured using the Temporal  
3304 Satisfaction With Life Scale.

3305

- 3306 - XR-NTX (380 mg/month) is superior or equivalent to daily buprenorphine-naloxone in  
3307 reducing or stabilizing non-opioid substance use as measured by the number of urine drug tests  
3308 (UDTs) positive for illicit, non-opioid substances or their metabolites from Week 1-12 in the  
3309 study or in self-reported use of (or abstinence from) non-opioid substances including cocaine,  
3310 amphetamines, benzodiazepines, alcohol, cannabis, and hallucinogenic drugs (e.g. LSD,  
3311 MDMA, GHB).  
3312  
3313 - XR-NTX (380 mg/month) is superior or equivalent to daily buprenorphine-naloxone in  
3314 reducing or stabilizing drug-related needle use as measured by the number of days needle use  
3315 reported from randomization to Week 12 on time-line follow-back.  
3316  
3317 - XR-NTX (380 mg/month) is superior or equivalent to daily buprenorphine-naloxone in  
3318 reducing income from illicit sales of drugs as assessed by the change from randomization to  
3319 Week 12 in self-reported days with such income and/or the total amount of income from these  
3320 sources in Norwegian Kroner (NKR; 10 NKR = approximately 1,7 US \$). The Europ-ASI will  
3321 be used for this outcome.  
3322 . XR-NTX (380 mg/month) is superior or equivalent to daily buprenorphine-naloxone in  
3323 reducing or stabilizing frequency of injecting drug use as assessed by the change from  
3324 randomization to Week 12 in self-reported days with such use and/or the total use of needles in  
3325 days during each month on the Europ-ASI.  
3326 . XR-NTX (380 mg/month) is superior or equivalent to daily buprenorphine-naloxone in  
3327 reducing or stabilizing blood-borne disease risk behaviours as assessed by the change from  
3328 randomization to Week 12 in self-reported needle use habits for each month on the Europ-ASI.  
3329 .  
3330 A secondary objective of this study is to evaluate if XR-NTX in the clinical and/or criminal justice  
3331 settings affects motivation for abstinence compared to buprenorphine-naloxone and/or non-randomized  
3332 controls by assessing the change from randomization to Week 12 in self-reported abstinence motivation  
3333 on the total or subscale levels of the Stages of Change Readiness and Treatment Eagerness Scale Drugs  
3334 (SOCRATES 8D). Data on SOCRATES 8D is excluded from analyses due to lack of approved  
3335 scientific validation of the Norwegian version.”

3336

3337 **pp. 66, Section 6.2.2.3 Other secondary objectives: Quality of Life**

3338 The original version reads:

3339 “A secondary objective of this study is to evaluate if XR-NTX (380 mg/month) improves quality of life  
3340 of patients with Opioid Dependence, compared to buprenorphine-naloxone or no study medication. The  
3341 hypothesis regarding TSWLS total score, a secondary variable of particular interest, is specified in  
3342 6.2.2.2. The other secondary quality of life hypothesis is:

3343 XR-NTX (380 mg/month) is superior to buprenorphine-naloxone (8-24 mg/day) in increasing the  
3344 TSWLS overall quality of life score from randomisation to Week 12.”

3345 The revised version shall read:

3346 “A secondary objective of this study is to evaluate if XR-NTX (380 mg/month) improves or stabilizes  
3347 quality of life of patients with Opioid Dependence, compared to buprenorphine-naloxone. The  
3348 hypothesis regarding TSWLS total score, a secondary variable of particular interest, is specified in

3349

3350

3351 6.2.2.2. The other secondary quality of life hypothesis is:

3352 XR-NTX (380 mg/month) is superior or equivalent to daily buprenorphine-naloxone in increasing or  
3353 stabilizing the TSWLS overall quality of life score from randomization to Week 12.”

3354

3355 **pp. 67, Section 6.2.2.3 (cont.) Other secondary objectives: Quality of Life**

3356 The original version reads:

3357 “A secondary objective of this study is to evaluate if XR-NTX (380 mg/month) improves satisfaction  
3358 with medication compared to buprenorphine-naloxone or no study medication. The secondary  
3359 hypothesis is as follows:

3360 XR-NTX (380 mg/month) is superior to buprenorphine-naloxone (8-24 mg/day) in increasing the  
3361 VAS satisfaction with medication score at Week 12.”

3362 The revised version reads:

3363 “A secondary objective of this study is to evaluate how satisfaction with XR-NTX (380 mg/month)  
3364 compares to satisfaction with daily buprenorphine-naloxone. The secondary hypothesis is as follows:

3365 XR-NTX (380 mg/month) is superior or equivalent to daily buprenorphine-naloxone in increasing or  
3366 stabilizing the VAS satisfaction with medication score at Week 12.”

3367

3368

3369

3370

3371

3372

3373

3374

3375

3376

## **Amendment 10 to CSP version 3C in the study 'Optimal Prevention of Overdose Deaths and Opioid Relapse**

3377

### **Following**

3378

### **Discharge: A Multi-Center RCT' (EudraCT: 2011-002858-31)**

3379

3380

*Oslo, Mar 8th 2016,*

3381

3382

#### **Definition of Adverse (AE) – and Serious Adverse Events (SAE)**

3383

3384

The traditional definition of SAE states that any in-patient hospitalisation or prolongation of existing hospitalisation over night is registered as a Severe Adverse Event. This definition is satisfactory for non-addicted patient samples where hospitalisation signals a clear increase in severity. However, this may not be satisfactory in a high-risk population such as poly-drug using opioid users, who often mask somatic and psychiatric problems with substance use and are exposed to a higher incidence of health problems due to substance abuse, criminal involvement, lack of permanent residency and other problems. Research on the current standard treatment (and active comparator in this study) in Norway suggests that a stable reduction in illicit opioid use is followed by a transition in the utilization of health services from acute care for injectionrelated disease events to planned admissions for treatment of general somatic and mental health events (see [1]). The literature does not give reason to expect opioid users in treatment with extended-release naltrexone (XR-NTX; study drug in this study) to behave differently from this norm.

3398

3399

Thus in the lives of the majority of opioid users, admissions to hospital will often signify increased access to healthcare due to overall improvement or recovery from illicit drug use. Many of these admissions would not be consistent with the premise that a SAE signifies a worsening of the condition under investigation. This also applies to residential treatment or hospital-based care for mental health problems, addiction problems, and personality disorders.

3405

3406

In order for the registration of SAE to better reflect the occurrence of negative health events in opioid users in the study, this amendment revises the in-study definition of AEs and SAEs to comprise only acute admissions for unexpected health problems. Planned admissions will still be registered in Europ-ASI Chapter B – days in a controlled environment, Chapter C (somatic health problems and hospitalizations) or Chapter I (mental health hospitalizations).

3412

3413

The original protocol pp 79, section 9.1. reads:

3414

#### **9.1.1 Adverse Event (AE)**

3415

*An AE is the development of an undesirable medical condition or the deterioration of a pre-existing medical condition following or during exposure to a pharmaceutical product,*

3417

3418 *whether or not considered causally related to the product. An undesirable medical*  
3419 *condition can be symptoms (e.g., nausea, chest pain), signs (e.g., tachycardia, enlarged*  
3420 *liver) or the abnormal results of an investigation (e.g., laboratory findings). In clinical*  
3421 *studies, an AE can include an undesirable medical condition occurring at any time,*  
3422 *including run-in or washout periods, even if no study treatment has been administered.*  
3423

#### 3424 **9.1.2 Serious Adverse Event (SAE)**

3425 *An SAE is an AE occurring during any study phase (i.e., run-in, treatment, wash-out, follow-*  
3426 *up), and at any dose of the products used in this study that fulfils one or more of the*  
3427 *following criteria:*

- 3428 • *Results in death*
- 3429 • *Is immediately life-threatening*
- 3430 • *Requires in-patient hospitalisation or prolongation of existing hospitalization*
- 3431 • *Results in persistent or significant disability or incapacity*
- 3432 • *Is a congenital abnormality or birth defect*
- 3433 • *Is an important medical event that may jeopardise the patient or may require*  
3434 *medical intervention to prevent one of the above listed outcomes*

3435 *The causality of SAE (i.e. their relationship to study treatment) will be assessed by the*  
3436 *investigator(s), who in completing the relevant CRF must answer “yes” or “no” to the*  
3437 *question “Do you consider that there is a reasonable possibility that the event may have*  
3438 *been caused by XR-NTX?”*

3439 *For further guidance on the definition of a SAE and a guide to the interpretation of the*  
3440 *causality question, see Appendix B. Note that SAEs that could be associated with any study*  
3441 *procedure should also be reported. For such events the causal relationship is implied as*  
3442 *“yes”.*

3443  
3444 The revised text shall read:

#### 3446 **9.1.1 Adverse Event (AE)**

3447 *An AE is the development of unexpected or previously unknown undesirable medical*  
3448 *condition or the deterioration of a pre-existing medical condition following or during*  
3449 *exposure to a pharmaceutical product, whether or not considered causally related to the*  
3450 *product. An undesirable medical condition can be symptoms (e.g., nausea, chest pain),*  
3451 *signs (e.g., tachycardia, enlarged liver) or the abnormal results of an investigation (e.g.,*  
3452 *laboratory findings). In clinical studies, an AE can include an undesirable medical*  
3453 *condition occurring at any time, including during run-in or washout periods, even if no*  
3454 *study treatment has been administered.*  
3455

#### 3456 **9.1.2 Serious Adverse Event (SAE)**

3457 *An SAE is an AE occurring during any study phase (i.e., run-in, treatment, washout,*  
3458 *follow-up), and at any dose of the products used in this study that fulfils one or more of*  
3459 *the following criteria:*

- 3460 • *Results in death*
- 3461 • *Is immediately life-threatening*



- 3462       • Requires unplanned or acute in-patient hospitalisation or unplanned prolongation of  
3463       existing hospitalisation in a somatic, psychiatric or addiction ward  
3464       • Results in persistent or significant disability or incapacity  
3465       • Is a congenital abnormality or birth defect  
3466       • Is an important medical event that may jeopardise the patient or may require medical  
3467       intervention to prevent one of the above listed outcomes  
3468

3469       The causality of SAE (i.e. their relationship to study treatment) will be assessed by the  
3470       investigator(s), who in completing the relevant CRF must answer “yes” or “no” to the  
3471       question “Do you consider that there is a reasonable possibility that the event may have  
3472       been caused by XR-NTX?” For further guidance on the definition of a SAE and a guide to  
3473       the interpretation of the causality question, see Appendix B. Note that SAEs that could be  
3474       associated with any study procedure should also be reported. For such events the causal  
3475       relationship is implied as “yes”. The exception to this is the admission to washout  
3476       voluntary tapering of opioid drugs or medications following completion of the 12-Week  
3477       RCT period.  
3478

3479       **Reference:**

3480       1. Skeie I, Brekke M, Gossop M, Lindbaek M, Reinertsen E, Thoresen M, Waal H: Changes  
3481       in somatic disease incidents during opioid maintenance treatment: results from a  
3482       Norwegian cohort study. *BMJ Open* 2011,  
3483       1:e000130.

3484

3485 **pp. 68, Section 6.3. Description of Analysis Sets**

3486

3487 The original version reads:

3488

3489 “The per-protocol (PP) population, a subset of the MITT population, will include patients who  
3490 completed the study treatment with no major protocol violations or deviations affecting effectiveness.  
3491 Data from this population will be used as a consistency check for analysis of the primary objective.”

3492

3493 The revised version shall read:

3494

3495 “The per-protocol (PP) population (aka Observed Cases (OC)), a subset of the MITT population, will  
3496 include patients who completed the study treatment with no major protocol violations or deviations  
3497 affecting effectiveness. Data from this population will be used as a consistency check for analysis of the  
3498 primary objective.”

3499

3500 **pp. 69, 6.4. Method of Statistical Analysis**

3501 **pp.69, 6.4.1 General aspects**

3502

3503 The original version reads:

3504

3505 “Missing data will be imputed using a Last Observation Carried Forward (LOCF) approach. Patients  
3506 with post randomisation data will have their last study assessment carried forward as the final  
3507 assessment for analyses. These will serve as accurate estimates since the patients could be expected to  
3508 get better over time. Analyses on Observed Cases (OC) will be performed to study the robustness of the  
3509 results.

3510 Baseline values, collected at randomisation or enrolment, will be defined as the last non- missing value  
3511 prior to receiving first dose of study treatment.”

3512 The revised version shall read:

3513

3514 “Missing data will be imputed using an appropriate imputation method, e.g. Last Observation Carried  
3515 Forward (LOCF) and patients who lack such data have their pre-participation data carried forward (ITT  
3516 analysis set). Patients with post randomisation data (MITT analysis set) will have their last study  
3517 assessment carried forward as the final assessment for analyses,. Analyses on Observed Cases (OC) (Per  
3518 Protocol analysis set) will also be performed to study the robustness of the results.

3519 Baseline values, collected at enrolment, will be defined as the last non- missing value prior to receiving  
3520 first dose of study treatment.”

3521 The revised version shall add:

3522

3523 “The Statistical Analysis Plan (SAP) may add additional guidance on statistical analyses and / or the  
3524 adaptation of the contents of this Section to statistical analyses.”

3525

3526

3527 **pp.69 Section 6.5 Multiplicity**

3528

3529 The original version reads:

3530

3531 “For the confirmative strategy, a step-wise sequential testing procedure will be used for handling  
3532 multiple comparisons such that the overall significance level of 0.05 is preserved. First the primary  
3533 outcome variable the number of opioid free saliva samples from randomisation to Week 12 will be tested  
3534 for the naltrexone versus the suboxone group.

3535

3536 All statistical tests will be two-sided with a significance level of 5%, i.e.  $\alpha=0.05$  unless otherwise  
3537 specified. Secondary analyses will report nominal 5% levels of significance, but p- values will be  
3538 displayed primarily to aid the interpretation of results. No adjustments for multiplicity will be made for  
3539 these secondary analyses. Where appropriate, model-based point estimates will be presented together  
3540 with their 95% confidence intervals. Unless otherwise stated the interest will separately focus on the  
treatment differences between the groups.”

3541 The revised version shall read:

3542

3543 “For the confirmative strategy, a step-wise sequential testing procedure will be used for handling  
3544 multiple comparisons such that the overall significance level of 0.05 is preserved. First the primary  
3545 outcome variable the number of opioid free urine drug tests from Week 1 to Week 12 will be tested for  
3546 the naltrexone versus the suboxone group.

3547

3548 All statistical tests will be two-sided with a significance level of 5%, i.e.  $\alpha=0.05$  unless otherwise  
3549 specified. Secondary analyses will report nominal 5% levels of significance, but p- values will be  
3550 displayed primarily to aid the interpretation of results with adjustments for multiplicity made as  
3551 appropriate. Where appropriate, model-based point estimates will be presented together with their 95%  
3552 confidence intervals. Unless otherwise stated the interest will separately focus on the treatment  
differences or – similarities between the groups.”

3553 **pp. 69, Section 6.4.3 Primary variable**

3554

3555 “An analysis of variance (ANOVA) model for between-groups differences at Week 12 in the number of  
3556 opioid-positive oral fluid samples will be used. Study drug groups (XR-NTX 380 mg/month or  
3557 buprenorphine-naloxone 8-24 mg/day) will be compared, and also compared separately or collectively  
3558 (as a ‘medication’ group) to participants not receiving any study drug. The model will include treatment,  
3559 centre and setting as explanatory variables. Centre will be treated as a random effect while all other  
3560 explanatory variables will be treated as fixed effects. Model-based point estimates, 95% confidence  
intervals and p-values will be reported.”

3561 The revised version shall read:

3562

3563 “An analysis of variance (ANOVA) model for between-groups differences at Week 12 in the number of  
3564 opioid-positive urin fluid samples will be used. Study drug groups. The model will include treatment,  
3565 centre and setting as explanatory variables. Centre will be treated as a random effect while all other  
3566 explanatory variables will be treated as fixed effects. Model-based point estimates, 95% confidence  
3567 intervals and p-values will be reported.”

3568 (Note: Mixed-models approaches are already mentioned in this Section at top paragraph,

3569 pp70, and comprise both General Linear – and Alinear Mixed Models).

3570

3571 **pp. 73, Section 6.5: Determination of Sample Size**

3572

3573 The original version reads:

3574

3575

3576

3577

3578

“The sample size calculation in this exploratory study was done to model the event that XR- NTX demonstrates superior effectiveness over buprenorphine-naloxone with respect to the primary outcome variable, differences in opioid-negative oral fluid samples from randomisation to Week 12 – a total of 12 oral fluid samples.”

3579

The revised version shall read:

3580

3581

3582

3583

3584

“The sample size calculations in this exploratory study was done to model the event that XR- NTX demonstrates superior or noninferior effectiveness to buprenorphine-naloxone with respect to the primary outcome variables, including proportion opioid-negative urine samples from randomisation to Week 12 – a total of 12 urine drug tests.”

3585

The original version reads:

3586

3587

3588

3589

3590

3591

3592

3593

3594

3595

3596

“The minimum sample size was estimated by assuming that participants receiving XR-NTX will achieve opioid-negative samples on a mean of 7 out of the total 12 samples, while participants receiving buprenorphine-naloxone will deliver a mean of 4 opioid-negative samples. The estimates assume a 95% significance level ( $p < .05$ ) and a standard deviation of 3 in both medication groups. A power (beta) set to 90%, a sample size of 17 patients/medication arm will be sufficient, or  $n=34$  total. Missing samples will be counted as positive in an ITT- manner. Sample size calculations were based on information from previous studies of buprenorphine- naloxone showing attrition of about 50% in the first months following discharge from criminal justice settings. Attrition in the naltrexone group is based on previous studies with sustained release naltrexone in Norwegian settings showing only about 5% attrition.”

3597

The revised version shall add:

3598

3599

3600

3601

3602

3603

3604

**pp. 74, Section 6.6: Interim analyses**

3605

3606

The original version reads:

3607

3608

3609

3610

3611

“No interim analyses are planned. Regular analyses will be performed 1) after completion of the randomized trial, and 2) separate analyses performed for the non-randomized part of the study. In addition, more regular analyses may be performed following the conclusion of the trial, in particular (but not restricted to) after collection of data from national registries / databases.”

3612

The revised version shall read:

3613

3614

3615

“No interim analyses are planned. Regular analyses will be performed 1) after completion of the randomized trial, and 2) separate analyses performed for the non-randomized part of the study. Regular

Clinical Study Protocol  
Drug XR-NTX  
Study Code: NTX-204725-1  
Edition Number 3C  
Date: June 12, 2012

3616 analyses may commence after 'Last Patient in', e.g. the last patient is included in the study as deemed  
3617 appropriate by the Principal Investigator. In addition more regular analyses may be performed following  
3618 the conclusion of the trial, in particular (but not restricted to) after collection of data from national  
3619 registries / databases.”

3620

## **STATISTICAL ANALYSIS PLAN**

for the clinical trial

### **'Optimal Prevention of Overdose Deaths and Opioid Relapse Following Discharge: A Multi-Center RCT'**

Study code: NTX-204725-1

Protocol version: 3C with amendments

Version 1.0b February 2015

## Table of Contents

|                                                                                                                                  |           |
|----------------------------------------------------------------------------------------------------------------------------------|-----------|
| <b>INTRODUCTION TO THE NTX-SBX STATISTICAL ANALYSIS PLAN</b>                                                                     | <b>3</b>  |
| Table 1. Overview of statistics-relevant information in the NTX-SBX study                                                        | 3         |
| NTX-SBX study design and investigatory status of outcomes in the study                                                           | 4         |
| Role of publications versus NTX-SBX guidance on analyses                                                                         | 4         |
| <b>PREPARATIONS OF DATA FOR ANALYSES</b>                                                                                         | <b>5</b>  |
| <b>STATISTICAL PROCEDURES FOR THE DIFFERENT PHASES OF INVESTIGATION</b>                                                          | <b>5</b>  |
| Table 2. Planned statistical – and data management procedures the four phases of investigation                                   | 7         |
| <b>NON-INFERIORITY SCENARIOS</b>                                                                                                 | <b>8</b>  |
| Non-inferiority analyses and - margins                                                                                           | 8         |
| Defining non-inferiority margins for opioid addiction outcomes                                                                   | 8         |
| Table 3a. Non-inferiority margins and corresponding group size estimates for primary outcomes                                    | 9         |
| Table 3b. Non-inferiority margins and corresponding group size estimates for secondary outcomes                                  | 9         |
| <b>ADVERSE EVENTS AND PATIENTS FLOW</b>                                                                                          | <b>10</b> |
| <b>APPENDIX TO THE STATISTICAL ANALYSIS PLAN (SAP): SUM SCORE CALCULATION FOR PATIENT-REPORTED OUTCOMES IN THE NTX-SBX STUDY</b> | <b>11</b> |
| Symptom Checklist 25 (aka Hopkins' Symptom Checklist 25 or SCL-25)                                                               | 11        |
| The Stages of Change Eagerness and Readiness Scale (SOCRATES) 8D                                                                 | 11        |
| Insomnia Severity Index                                                                                                          | 11        |
| Temporal Satisfaction with Life Scale, 'Current' Items (TSWLS)                                                                   | 11        |
| Visual Analogue Scales on Heroin use, craving, treatment satisfaction a.o.                                                       | 11        |

## Introduction to the NTX-SBX Statistical Analysis Plan

This section repeats and summarizes the statistical analysis information described in the study protocol and its ensuing amendments in order to improve ease-of-use of this Statistical Analysis Plan (SAP) as a template for the statistical analyses of data originating from the clinical trial 'Optimal Prevention of Overdose Deaths and Opioid Relapse Following Discharge: A Multi-Center RCT' (from here on referred to as 'the study' or 'the NTX-SBX study').

The role of the SAP is to complement and expand on statistics and data sections in the Clinical Study Protocol (CSP) with amendments. To improve guidance, some aspects of data management mentioned in the CSP and Data Management Plan (DMP) are repeated here.

**Table 1** provides an overview of where to locate statistically relevant information in the NTX-SBX study documents.

**Table 1. Overview of statistics-relevant information in the NTX-SBX study**

| <i>Statistical Topic</i>                                 | <b>Clinical Study Protocol with Amendment 7</b> | <b>Statistical Analysis Plan (SAP)</b> | <b>Data Management Plan</b> |
|----------------------------------------------------------|-------------------------------------------------|----------------------------------------|-----------------------------|
| <i>Hypotheses</i>                                        | Yes, Section 6.2 pp 64-69, Amd7 pp 4-9          | No                                     | No                          |
| <i>Outcomes – descriptions and definitions</i>           | Yes, Section 4, pp 50-54, 56-69, Amd7 pp 2      | No                                     | No                          |
| <i>Statistical Power analyses</i>                        | Yes, Section 6.5. pp 73, Amd 7 p11              | Yes – non-inferiority                  | No                          |
| <i>Non-inferiority margins for outcomes</i>              | No                                              | Yes                                    | No                          |
| <i>Analysis sets – descriptions</i>                      | Yes, Section 6.3, pp. 68, Amd 7 p9              | No                                     | No                          |
| <i>Study design &amp; phases</i>                         | Yes                                             | Briefly                                | No                          |
| <i>Procedures for preparation &amp; handling of data</i> | Yes, Section 5 pp 63, Amd7 p3                   | No                                     | Yes                         |
| <i>Statistical procedures and – analyses</i>             | Yes, Section 6.4.3, 6.5,                        | Yes, detailed guidance                 | No                          |



## **NTX-SBX study design and investigatory status of outcomes in the study**

Traditionally, scientific investigations of medical treatments are divided into two categories: Confirmatory studies are typically done with large samples in naturalistic settings with the emphasis of defining a finite set of hypotheses and analyses that must not be changed once data have been collected and the database has been locked from further editing; such changes or deviations from the SAP are considered post-hoc – editing hypotheses to fit the data - and are regarded with considerably less confidence than the pre-defined hypotheses and – analyses.

The other type of investigation is exploratory studies, where efficacy is usually given priority by emphasizing internal validity. In exploratory studies, the SAP serves as a guidance for statistical analyses, but deviation from pre-planned analyses are permitted and thus need not be considered ‘post-hoc’ in a statistical/philosophical sense (EMA 2006: ICH Topic 9, Statistical analyses). For this reason, however, results from exploratory studies are not given the same significance as confirmatory studies.

The NTX-SBX study is an open-label exploratory comparison of extended release naltrexone with daily buprenorphine-naloxone for the treatment of opioid dependence. While a first-of-its-kind study, it has characteristics normally seen in confirmatory trials, e.g.: A ‘naturalistic’ setting with few restrictions on who are admitted into the study; an open-label design with free disclosure of study medication due to ethical concerns with placebo in testing opioid-blocking medication; use of medications whose characteristics have been investigated in other trials with users of illicit opioids. These characteristics emphasize external validity (aka generalizability).

Thus the SAP of the NTX-SBX study will consider analyses of adverse events to be of a confirmatory nature, while studies of effectiveness for primary and secondary outcomes will be regarded as exploratory.

### **Role of publications versus NTX-SBX guidance on analyses**

In situations where Journal author guidelines or editor / referee opinion require or request statistical analyses or procedures other than those described in the CSP or SAP, the NTX-SBX National management or delegate will respond to the request and decide on the feasibility and applicability of the request.

## Preparations of data for analyses

This section provides a brief summary of data management information found in the NTX-SBX protocol (CSP) and data management plan (DMP).

Once the last patient has been included in the study, data will be retrieved from the GCP-approved MedInsight database in a compatible format (SPSS, R, or similar) and inspected for errors.

Following data entry and – inspection of the last included patient, the database will be locked for further editing and considered final. If feasible, database lock will occur in stages corresponding to the end of data entry from each phase of investigation (see below).

RCT data (from inclusion Week 0 to Week 12 / Day 85) will have names of medication groups masked by the letters 'A' and 'B' before being made available to a designated statistician for analysis. The masking should be preserved until statistical analyses are considered final by the NTX-SBX National Management (PI and National Study Coordinator).

For composite scores (e.g. patient-reported outcomes (PROs) like forms and scales), total score and any subscale scores will have to be calculated based on the data file originating from MedInsight and added to the study data file for analysis. An appendix to this SAP will contain the necessary information for calculating the scores for each patient on the different study PROs.

## Statistical procedures for the different phases of investigation

The NTX-SBX data will originate from four phases of investigation, of which only the first is randomized:

- 1) Inclusion until RCT Phase completion at 12 Week follow-up.
- 2) The Continuation Phase lasting from Weeks 13 until Week 48 Post Inclusion
- 3) The Prolongation phase (See Amendment 6, 'Prolong') lasting from Week 49 Post Inclusion and until Week 89 or beyond. Study Management have for ethical reasons elected to offer Study Medication to study participants who demonstrate willingness and ability to benefit from the medication for as long as feasible or until it is available through other legitimate sources.
- 4) Registry data Phase; patients have provided informed consent to retrieve their data from various national database registries. This opportunity may be conducted as part of long-term studies and / or other designs and comparisons, depending on scientific merit and available resources.

Note: Information on or from patients queried / screened about their interest in study participation may be compared to clinical data to address questions

regarding the link between interest in medication / participation and actual participation. As pre-consent data are not a part of this study, they will not be subject to further discussion in this SAP.

**Table 2** (below) shows the planned statistical – and data management procedures applied to the data originating from the four phases of investigation in the NTX-SBX study.

**Table 2. Planned statistical – and data management procedures the four phases of investigation**

|                                                                      | <b>RCT Phase</b>                                                       | <b>Continuation</b>                        | <b>Prolongation</b>                        | <b>Registry data</b>                       |
|----------------------------------------------------------------------|------------------------------------------------------------------------|--------------------------------------------|--------------------------------------------|--------------------------------------------|
| <i>Week no.</i>                                                      | 0/1 – 12                                                               | 13 – 48                                    | 49 – 89 +                                  | - 52 – 52                                  |
| <i>'MedInsight' database data entry &amp; retrieval</i>              | Yes                                                                    | Yes                                        | No                                         | No                                         |
| <i>Masking of medication groups for analyses of primary outcomes</i> | Yes                                                                    | No                                         | No / N.A.                                  | N.A.                                       |
| <i>Designated Statistician to conduct analyses</i>                   | Yes (primary outcomes / main article)                                  | As needed / collaboration with lead author | As needed / collaboration with lead author | As needed / collaboration with lead author |
| <i>Analysis sets</i>                                                 | Yes: ITT & MITT/PP, others as appropriate                              | If applicable                              | If applicable                              | If applicable                              |
| <i>Imputation or estimation of missing data</i>                      | Yes LOCF for outcomes in ITT (where possible)                          | Optional                                   | Optional                                   | N.A.                                       |
| <i>Equivalence / non-inferiority testing</i>                         | Yes, on primary outcomes where H1 is false, optional on other outcomes | N.A.                                       | N.A.                                       | Optional                                   |
| <i>Controlling for centre / site</i>                                 | Yes, for primary outcomes                                              | If applicable                              | If applicable                              | If applicable                              |
| <i>Controlling for multiplicity</i>                                  | Yes                                                                    | If applicable                              | If applicable                              | If applicable                              |
| <i>Adverse Events analyses</i>                                       | Yes                                                                    | If applicable                              | If applicable                              | If applicable                              |

## Non-inferiority scenarios

### Non-inferiority analyses and - margins

The ICH-GCP guidance on statistical analysis (aka 'Chapter 9') state that RCTs comparing a novel treatment with preferred treatment should have hypotheses, analysis plans and power estimates to analyze both statistically significant differences (aka 'superiority' / 'non-equality') and non-inferiority (aka 'equality', 'non-inferiority', etc; EMEA, 2006).

An estimate of non-inferiority requires a defined limit for the minimum clinically meaningful between-group difference for each outcome - e.g. what would be the minimum increment on each outcome required to be relevant or noticeable to treatment personnel and patients?

### Defining non-inferiority margins for opioid addiction outcomes

The size or quality of the minimum significant difference (non-inferiority margin) varies with the characteristics of the outcome measure, of the study setting, and of the illness under investigation. E.g. consensus on what is the minimum clinically significant margin is likely reduced with continuous versus binary (or stepwise) measures, and is likely easier with brief, well-defined illnesses as opposed to chronic comprehensive disorders like opioid addiction.

Thus in the case of opioid addiction, the increment of a single measure would need to be sizeable to signify a clear, reliable step towards (or away from) recovery. We have therefore defined non-inferiority margins that are no smaller than 10%, and in some cases 20-25%. Outcomes may depend on measures designed to reflect an incremental burden of symptoms rather than separate well-defined states of recovery or illness. E.g. a 10% variation in drug use that occurs every day on a 30-day measure (range: 0-30) could be due to external factors like travel or an influenza infection limiting access to drugs. A 20-30% improvement, however, seems less controversial as a clear indicator of change. In similar manner, urine drug tests are based on immunoassay technologies with well-known limitations in reliability and validity; again, a larger number of tests (three or more) seem less controversial as an indicator of change.

**Table 3 (Tab 3)** shows the non-inferiority margins in the NTX-SBX study and estimates the necessary number of participants in each group needed to show non-inferiority given an alpha of 95% and beta of 80%. Note that the estimates are based on simple, means-based tests that assuming normal distribution for continuous variables and binary / non-linear tests for proportions; with different statistical procedures or breach of these assumptions, the power/margin size ratio may change. Estimates are also based on identical group values, something that is unlikely to occur in the NTX-SBX dataset; a larger number of participants may be needed for groups with differing values, and this number should increase the closer the difference is to the outcome-specific non-superiority margin.

**Table 3a. Non-inferiority margins and corresponding group size estimates for primary outcomes**

|                                                    | <u>Non-inferiority margin</u> | <u>Minimum group sample sizes (n)</u> |        | <u>Group values (examples)</u> |                       |
|----------------------------------------------------|-------------------------------|---------------------------------------|--------|--------------------------------|-----------------------|
| <b>Primary outcome (range)</b>                     |                               | XR-NTX                                | BP-NLX | XR-NTX                         | BP-NLX                |
| <i>Proportion opioid-negative UDT's (0-1.0)</i>    | 3 of 12 tests / 0.25 / 25%    | N=45                                  | N=45   | 8 of 12 / 0.66                 | 8 of 12 / 0.66        |
| <i>Days abstinence from illicit opioids (0-85)</i> | 10 days / 11.7%               | N=50                                  | N=50   | Mean 65 days (sd: 20)          | Mean 65 days (sd: 20) |
| <i>Completed RCT study (% of n)</i>                | 20%                           | N=58                                  | N=58   | 0.70                           | 0.70                  |
| <i>Opioid dependent (DSM-IV) (% of n / 0-1.0)</i>  | 20% / 0.2                     | N=28                                  | N=28   | 0.10 / 10%                     | 0.10 / 10%            |

**Table 3b. Non-inferiority margins and corresponding group size estimates for secondary outcomes**

| <b>Secondary outcome (range)</b>           | <u>Non-inferiority margin</u> | <u>Minimum group sample size (n)</u> | <u>Minimum group sample size (n)</u> | <u>Group value (example)</u> | <u>Group value (example)</u> |
|--------------------------------------------|-------------------------------|--------------------------------------|--------------------------------------|------------------------------|------------------------------|
| <i>Heroin Craving (0-10)</i>               | 2.0                           | N=50                                 | N=50                                 | Mean 2.5, (s.d. 4.0)         | Mean 2.5, (s.d. 4.0)         |
| <i>Days injecting drug use (0-85 days)</i> | 12 days                       | N=68                                 | N=68                                 | Mean 25 days (sd: 28)        | Mean 25 days (sd: 28)        |
| <i>Quality of Life (5-35)</i>              | 5 points                      | N=72                                 | N=72                                 | Mean 20 (sd: 12)             | Mean 20 (sd: 12)             |
| <i>Days of amphetamine use (0-85)</i>      | 14 days                       | N=57                                 | N=57                                 | Mean 20 days (sd: 30)        | Mean 20 days (sd: 30)        |

Other secondary outcomes may have non-inferiority margins defined as needed by the NTX-SBX National Management once statistical analyses have commenced.

## Adverse Events and Patient Flow

In accordance with the study protocol (CSP), Adverse Events and patient flow/retention will be analyzed using the most feasible non-continuous analysis – e.g. log-rank, Chi Square, Fischer’s Exact Test or potentially Generalized Additive Mixed Model as appropriate.

### Categorization of events

Adverse events may be categorized according to their seriousness, the symptoms presented, and the assumed relation to study medication.

Definitions of seriousness are provided in the CSP and ICH-GCP; in brief, only events requiring extra hospitalization, resulting in a life-threatening state or in death are categorized as Serious Adverse Events (SAEs). Less dramatic events requiring minor treatment interventions (e.g. symptomatic medication) are categorized and reported as Adverse Events. Unexpected life-threatening SAEs attributed to study medication are called Sudden Unexpected SAEs (SUSARS).

A separate category of adverse events in the NTX-SBX study will be established to reflect withdrawal syndrome states (e.g. diarrhea, vomiting, sweating). These events reflect the lack of experience of study personnel in inducing patients onto XR-NTX from strong opioid agonists like buprenorphine and methadone; this requires a longer detoxification and, ideally, opioid-free urine drug tests before XR-NTX is administered, but was not specified in the protocol. Thus these types of events should be identified (as they describe withdrawal symptoms following the first dose of XR-NTX) and may be presented separately from other adverse events in order to not confuse them with adverse events originating from the pharmacological properties of the study medication (XR-NTX).

## **Appendix to the Statistical Analysis Plan (SAP): Sum Score Calculation for Patient-Reported Outcomes in the NTX-SBX Study**

### **Symptom Checklist 25 (aka Hopkins' Symptom Checklist 25 or SCL-25)**

Total Score: Summarize all items (scale range 1-4)

Anxiety Subscale: Summarize items 1 – 10

Depression Subscale: Summarize items 11 – 25

Higher score on all items indicate greater number of symptoms of mental illness.

### **The Stages of Change Eagerness and Readiness Scale (SOCRATES) 8D**

Excluded from analyses due to no adequate validation of the Norwegian version of the scale.

### **Insomnia Severity Index**

Scale range 0-4 (5 steps)

Total score: Summarize scores for all seven items

Clinical categories exist for interpretation, and may be used for presentation purposes at the discretion of the Principal Investigator:

0-7: No clinically significant insomnia

8-14: Subthreshold insomnia

15-21: Clinical insomnia (moderate severity)

22-28: Clinical insomnia (severe)

### **Temporal Satisfaction with Life Scale, 'Current' Items (TSWLS)**

Scale range 1-7.

Total score: Summarize all five items (range: 5-35)

### **Visual Analogue Scales on Heroin use, craving, treatment satisfaction a.o.**

No composite scores – direct interpretation / description of the score on each item
